# Supplementary material
Source: PubMed Central journal article supplement (PMC3932025)
Supplement: NIHMS543701-supplement-supplementlist1.pdf [file NIHMS543701-supplement-supplementlist1.pdf]

# UCSC hg19 coordinate

| Chromosome | Start    | End      | Gene  |
|------------|----------|----------|-------|
| chr1       | 94458393 | 94458798 | ABCA4 |
| chr1       | 94461664 | 94461751 | ABCA4 |
| chr1       | 94463416 | 94463666 | ABCA4 |
| chr1       | 94466391 | 94466484 | ABCA4 |
| chr1       | 94466557 | 94466661 | ABCA4 |
| chr1       | 94467413 | 94467548 | ABCA4 |
| chr1       | 94470996 | 94471138 | ABCA4 |
| chr1       | 94473189 | 94473296 | ABCA4 |
| chr1       | 94473790 | 94473853 | ABCA4 |
| chr1       | 94474306 | 94474427 | ABCA4 |
| chr1       | 94476355 | 94476485 | ABCA4 |
| chr1       | 94476817 | 94476941 | ABCA4 |
| chr1       | 94480098 | 94480246 | ABCA4 |
| chr1       | 94481294 | 94481410 | ABCA4 |
| chr1       | 94485137 | 94485315 | ABCA4 |
| chr1       | 94486795 | 94486965 | ABCA4 |
| chr1       | 94487195 | 94487270 | ABCA4 |
| chr1       | 94487401 | 94487507 | ABCA4 |
| chr1       | 94488941 | 94488974 | ABCA4 |
| chr1       | 94490509 | 94490604 | ABCA4 |
| chr1       | 94495000 | 94495187 | ABCA4 |
| chr1       | 94495983 | 94496082 | ABCA4 |
| chr1       | 94496551 | 94496676 | ABCA4 |
| chr1       | 94497333 | 94497599 | ABCA4 |
| chr1       | 94502295 | 94502344 | ABCA4 |
| chr1       | 94502700 | 94502906 | ABCA4 |
| chr1       | 94505598 | 94505683 | ABCA4 |
| chr1       | 94506764 | 94506958 | ABCA4 |
| chr1       | 94508316 | 94508454 | ABCA4 |
| chr1       | 94508891 | 94509031 | ABCA4 |
| chr1       | 94510168 | 94510300 | ABCA4 |
| chr1       | 94512474 | 94512649 | ABCA4 |
| chr1       | 94514423 | 94514513 | ABCA4 |
| chr1       | 94517188 | 94517254 | ABCA4 |
| chr1       | 94520666 | 94520871 | ABCA4 |
| chr1       | 94522156 | 94522378 | ABCA4 |
| chr1       | 94526092 | 94526315 | ABCA4 |
| chr1       | 94528132 | 94528309 | ABCA4 |
| chr1       | 94528667 | 94528873 | ABCA4 |
| chr1       | 94543245 | 94543443 | ABCA4 |
| chr1       | 94544145 | 94544262 | ABCA4 |
| chr1       | 94544877 | 94545017 | ABCA4 |
| chr1       | 94546033 | 94546274 | ABCA4 |
| chr1       | 94548907 | 94548997 | ABCA4 |
| chr1       | 94564349 | 94564547 | ABCA4 |

|       |          |          |       |
|-------|----------|----------|-------|
| chr1  | 94568570 | 94568698 | ABCA4 |
| chr1  | 94574132 | 94574272 | ABCA4 |
| chr1  | 94576993 | 94577135 | ABCA4 |
| chr1  | 94578528 | 94578622 | ABCA4 |
| chr1  | 94586535 | 94586705 | ABCA4 |
| chr16 | 16243421 | 16244098 | ABCC6 |
| chr16 | 16244434 | 16244629 | ABCC6 |
| chr16 | 16248484 | 16248651 | ABCC6 |
| chr16 | 16248729 | 16248888 | ABCC6 |
| chr16 | 16251519 | 16251666 | ABCC6 |
| chr16 | 16253338 | 16253440 | ABCC6 |
| chr16 | 16255294 | 16255421 | ABCC6 |
| chr16 | 16256849 | 16257049 | ABCC6 |
| chr16 | 16259479 | 16259790 | ABCC6 |
| chr16 | 16263502 | 16263710 | ABCC6 |
| chr16 | 16267140 | 16267261 | ABCC6 |
| chr16 | 16269767 | 16269843 | ABCC6 |
| chr16 | 16271308 | 16271483 | ABCC6 |
| chr16 | 16272654 | 16272822 | ABCC6 |
| chr16 | 16276268 | 16276445 | ABCC6 |
| chr16 | 16276660 | 16276787 | ABCC6 |
| chr16 | 16278815 | 16278891 | ABCC6 |
| chr16 | 16280980 | 16281068 | ABCC6 |
| chr16 | 16282687 | 16282831 | ABCC6 |
| chr16 | 16284020 | 16284224 | ABCC6 |
| chr16 | 16286686 | 16286779 | ABCC6 |
| chr16 | 16291877 | 16292039 | ABCC6 |
| chr16 | 16295857 | 16296035 | ABCC6 |
| chr16 | 16297266 | 16297470 | ABCC6 |
| chr16 | 16302584 | 16302716 | ABCC6 |
| chr16 | 16306041 | 16306103 | ABCC6 |
| chr16 | 16308180 | 16308306 | ABCC6 |
| chr16 | 16313410 | 16313539 | ABCC6 |
| chr16 | 16313678 | 16313804 | ABCC6 |
| chr16 | 16315505 | 16315688 | ABCC6 |
| chr16 | 16317255 | 16317328 | ABCC6 |
| chr8  | 38854504 | 38854679 | ADAM9 |
| chr8  | 38865404 | 38865502 | ADAM9 |
| chr8  | 38869176 | 38869235 | ADAM9 |
| chr8  | 38871483 | 38871562 | ADAM9 |
| chr8  | 38873636 | 38873713 | ADAM9 |
| chr8  | 38874737 | 38874933 | ADAM9 |
| chr8  | 38876371 | 38876437 | ADAM9 |
| chr8  | 38879161 | 38879233 | ADAM9 |
| chr8  | 38880674 | 38880844 | ADAM9 |
| chr8  | 38883321 | 38883403 | ADAM9 |
| chr8  | 38884195 | 38884329 | ADAM9 |

|       |           |           |       |
|-------|-----------|-----------|-------|
| chr8  | 38899464  | 38899636  | ADAM9 |
| chr8  | 38911999  | 38912092  | ADAM9 |
| chr8  | 38913095  | 38913291  | ADAM9 |
| chr8  | 38928816  | 38928922  | ADAM9 |
| chr8  | 38934746  | 38934930  | ADAM9 |
| chr8  | 38947565  | 38947707  | ADAM9 |
| chr8  | 38948777  | 38948865  | ADAM9 |
| chr8  | 38959381  | 38959449  | ADAM9 |
| chr8  | 38961125  | 38962777  | ADAM9 |
| chr6  | 135605111 | 135606785 | AHI1  |
| chr6  | 135611560 | 135611663 | AHI1  |
| chr6  | 135621637 | 135621696 | AHI1  |
| chr6  | 135639656 | 135639754 | AHI1  |
| chr6  | 135644299 | 135644462 | AHI1  |
| chr6  | 135679269 | 135679325 | AHI1  |
| chr6  | 135715913 | 135716034 | AHI1  |
| chr6  | 135726088 | 135726115 | AHI1  |
| chr6  | 135732485 | 135732682 | AHI1  |
| chr6  | 135748304 | 135748445 | AHI1  |
| chr6  | 135749766 | 135749897 | AHI1  |
| chr6  | 135751019 | 135751138 | AHI1  |
| chr6  | 135752345 | 135752452 | AHI1  |
| chr6  | 135754164 | 135754394 | AHI1  |
| chr6  | 135759512 | 135759636 | AHI1  |
| chr6  | 135763719 | 135763852 | AHI1  |
| chr6  | 135768145 | 135768298 | AHI1  |
| chr6  | 135769427 | 135769613 | AHI1  |
| chr6  | 135774478 | 135774574 | AHI1  |
| chr6  | 135776871 | 135777064 | AHI1  |
| chr6  | 135778631 | 135778851 | AHI1  |
| chr6  | 135784262 | 135784444 | AHI1  |
| chr6  | 135786951 | 135787511 | AHI1  |
| chr6  | 135788718 | 135788772 | AHI1  |
| chr6  | 135811760 | 135811885 | AHI1  |
| chr6  | 135813365 | 135813429 | AHI1  |
| chr6  | 135818325 | 135818387 | AHI1  |
| chr6  | 135818720 | 135818903 | AHI1  |
| chr17 | 6327058   | 6329150   | AIPL1 |
| chr17 | 6329934   | 6330076   | AIPL1 |
| chr17 | 6330200   | 6330377   | AIPL1 |
| chr17 | 6331637   | 6331826   | AIPL1 |
| chr17 | 6337238   | 6337418   | AIPL1 |
| chr17 | 6338328   | 6338519   | AIPL1 |
| chr2  | 73612885  | 73613320  | ALMS1 |
| chr2  | 73635749  | 73635875  | ALMS1 |
| chr2  | 73646250  | 73646446  | ALMS1 |
| chr2  | 73649984  | 73650102  | ALMS1 |

|       |           |           |       |
|-------|-----------|-----------|-------|
| chr2  | 73651557  | 73652030  | ALMS1 |
| chr2  | 73653580  | 73653681  | ALMS1 |
| chr2  | 73659325  | 73659419  | ALMS1 |
| chr2  | 73675089  | 73681194  | ALMS1 |
| chr2  | 73682288  | 73682422  | ALMS1 |
| chr2  | 73716760  | 73718625  | ALMS1 |
| chr2  | 73746901  | 73747143  | ALMS1 |
| chr2  | 73761950  | 73762076  | ALMS1 |
| chr2  | 73777393  | 73777564  | ALMS1 |
| chr2  | 73784346  | 73784481  | ALMS1 |
| chr2  | 73786098  | 73786269  | ALMS1 |
| chr2  | 73799388  | 73800551  | ALMS1 |
| chr2  | 73826527  | 73826648  | ALMS1 |
| chr2  | 73827804  | 73828008  | ALMS1 |
| chr2  | 73828321  | 73828563  | ALMS1 |
| chr2  | 73829311  | 73829495  | ALMS1 |
| chr2  | 73830367  | 73830431  | ALMS1 |
| chr2  | 73835601  | 73835701  | ALMS1 |
| chr2  | 73836694  | 73837046  | ALMS1 |
| chr3  | 97483594  | 97483821  | ARL6  |
| chr3  | 97484834  | 97484933  | ARL6  |
| chr3  | 97486924  | 97487074  | ARL6  |
| chr3  | 97499002  | 97499064  | ARL6  |
| chr3  | 97499458  | 97499527  | ARL6  |
| chr3  | 97503798  | 97503893  | ARL6  |
| chr3  | 97506833  | 97506963  | ARL6  |
| chr3  | 97510614  | 97510670  | ARL6  |
| chr3  | 97516867  | 97517373  | ARL6  |
| chr10 | 124214178 | 124214540 | ARMS2 |
| chr10 | 124216422 | 124216868 | ARMS2 |
| chr3  | 63953419  | 63953651  | ATXN7 |
| chr3  | 63965590  | 63965843  | ATXN7 |
| chr3  | 63967861  | 63968121  | ATXN7 |
| chr3  | 63968614  | 63968697  | ATXN7 |
| chr3  | 63973734  | 63974000  | ATXN7 |
| chr3  | 63975851  | 63976050  | ATXN7 |
| chr3  | 63976413  | 63976535  | ATXN7 |
| chr3  | 63981180  | 63982159  | ATXN7 |
| chr3  | 63985125  | 63989134  | ATXN7 |
| chr11 | 66278118  | 66278177  | BBS1  |
| chr11 | 66278483  | 66278560  | BBS1  |
| chr11 | 66278675  | 66278710  | BBS1  |
| chr11 | 66281876  | 66282149  | BBS1  |
| chr11 | 66283010  | 66283057  | BBS1  |
| chr11 | 66283163  | 66283202  | BBS1  |
| chr11 | 66283331  | 66283404  | BBS1  |
| chr11 | 66287087  | 66287219  | BBS1  |

|       |           |           |       |
|-------|-----------|-----------|-------|
| chr11 | 66288740  | 66288847  | BBS1  |
| chr11 | 66290926  | 66291047  | BBS1  |
| chr11 | 66291194  | 66291353  | BBS1  |
| chr11 | 66293593  | 66293663  | BBS1  |
| chr11 | 66294119  | 66294278  | BBS1  |
| chr11 | 66297289  | 66297423  | BBS1  |
| chr11 | 66298364  | 66298499  | BBS1  |
| chr11 | 66299126  | 66299213  | BBS1  |
| chr11 | 66299421  | 66301084  | BBS1  |
| chr12 | 76738265  | 76741567  | BBS10 |
| chr12 | 76741941  | 76742222  | BBS10 |
| chr4  | 123653856 | 123654039 | BBS12 |
| chr4  | 123663037 | 123666098 | BBS12 |
| chr16 | 56518258  | 56518779  | BBS2  |
| chr16 | 56519501  | 56519650  | BBS2  |
| chr16 | 56530878  | 56530991  | BBS2  |
| chr16 | 56531654  | 56531792  | BBS2  |
| chr16 | 56532348  | 56532480  | BBS2  |
| chr16 | 56533689  | 56533819  | BBS2  |
| chr16 | 56534765  | 56534937  | BBS2  |
| chr16 | 56535264  | 56535409  | BBS2  |
| chr16 | 56536228  | 56536368  | BBS2  |
| chr16 | 56536584  | 56536720  | BBS2  |
| chr16 | 56539861  | 56539948  | BBS2  |
| chr16 | 56540031  | 56540136  | BBS2  |
| chr16 | 56543868  | 56543946  | BBS2  |
| chr16 | 56544770  | 56544833  | BBS2  |
| chr16 | 56545070  | 56545196  | BBS2  |
| chr16 | 56548364  | 56548592  | BBS2  |
| chr16 | 56553657  | 56554008  | BBS2  |
| chr15 | 72978525  | 72978592  | BBS4  |
| chr15 | 72987517  | 72987569  | BBS4  |
| chr15 | 73002040  | 73002120  | BBS4  |
| chr15 | 73004584  | 73004648  | BBS4  |
| chr15 | 73007631  | 73007743  | BBS4  |
| chr15 | 73009118  | 73009191  | BBS4  |
| chr15 | 73015134  | 73015188  | BBS4  |
| chr15 | 73016868  | 73016996  | BBS4  |
| chr15 | 73020280  | 73020335  | BBS4  |
| chr15 | 73021956  | 73022025  | BBS4  |
| chr15 | 73023645  | 73023798  | BBS4  |
| chr15 | 73023895  | 73024067  | BBS4  |
| chr15 | 73027453  | 73027523  | BBS4  |
| chr15 | 73028165  | 73028307  | BBS4  |
| chr15 | 73029102  | 73029304  | BBS4  |
| chr15 | 73029818  | 73030816  | BBS4  |
| chr2  | 170336005 | 170336122 | BBS5  |

|      |           |           |      |
|------|-----------|-----------|------|
| chr2 | 170338760 | 170338843 | BBS5 |
| chr2 | 170343578 | 170343644 | BBS5 |
| chr2 | 170344315 | 170344365 | BBS5 |
| chr2 | 170344496 | 170344624 | BBS5 |
| chr2 | 170349383 | 170349519 | BBS5 |
| chr2 | 170350250 | 170350346 | BBS5 |
| chr2 | 170354136 | 170354199 | BBS5 |
| chr2 | 170355995 | 170356130 | BBS5 |
| chr2 | 170359604 | 170359688 | BBS5 |
| chr2 | 170360812 | 170360836 | BBS5 |
| chr2 | 170360990 | 170363165 | BBS5 |
| chr4 | 122745634 | 122747148 | BBS7 |
| chr4 | 122749300 | 122749424 | BBS7 |
| chr4 | 122749556 | 122749660 | BBS7 |
| chr4 | 122749773 | 122749883 | BBS7 |
| chr4 | 122754385 | 122754550 | BBS7 |
| chr4 | 122756298 | 122756438 | BBS7 |
| chr4 | 122760785 | 122760851 | BBS7 |
| chr4 | 122765081 | 122765156 | BBS7 |
| chr4 | 122766658 | 122766851 | BBS7 |
| chr4 | 122768558 | 122768661 | BBS7 |
| chr4 | 122769998 | 122770083 | BBS7 |
| chr4 | 122774110 | 122774241 | BBS7 |
| chr4 | 122775858 | 122775975 | BBS7 |
| chr4 | 122776643 | 122776716 | BBS7 |
| chr4 | 122780146 | 122780333 | BBS7 |
| chr4 | 122782658 | 122782834 | BBS7 |
| chr4 | 122784371 | 122784434 | BBS7 |
| chr4 | 122789135 | 122789201 | BBS7 |
| chr4 | 122791432 | 122791642 | BBS7 |
| chr7 | 33169151  | 33169653  | BBS9 |
| chr7 | 33185853  | 33185976  | BBS9 |
| chr7 | 33192312  | 33192463  | BBS9 |
| chr7 | 33195249  | 33195314  | BBS9 |
| chr7 | 33217089  | 33217203  | BBS9 |
| chr7 | 33296847  | 33297022  | BBS9 |
| chr7 | 33303901  | 33303986  | BBS9 |
| chr7 | 33312623  | 33312807  | BBS9 |
| chr7 | 33313438  | 33313568  | BBS9 |
| chr7 | 33376052  | 33376234  | BBS9 |
| chr7 | 33380508  | 33380585  | BBS9 |
| chr7 | 33384192  | 33384246  | BBS9 |
| chr7 | 33388679  | 33388782  | BBS9 |
| chr7 | 33390830  | 33390935  | BBS9 |
| chr7 | 33392470  | 33392485  | BBS9 |
| chr7 | 33397466  | 33397607  | BBS9 |
| chr7 | 33407378  | 33407474  | BBS9 |

|       |          |          |         |
|-------|----------|----------|---------|
| chr7  | 33423277 | 33423450 | BBS9    |
| chr7  | 33427603 | 33427756 | BBS9    |
| chr7  | 33545074 | 33545257 | BBS9    |
| chr7  | 33573565 | 33573788 | BBS9    |
| chr7  | 33644476 | 33644587 | BBS9    |
| chr7  | 33644806 | 33645680 | BBS9    |
| chr11 | 61717355 | 61717899 | BEST1   |
| chr11 | 61719242 | 61719430 | BEST1   |
| chr11 | 61722578 | 61722673 | BEST1   |
| chr11 | 61723189 | 61723423 | BEST1   |
| chr11 | 61724315 | 61724470 | BEST1   |
| chr11 | 61724858 | 61724936 | BEST1   |
| chr11 | 61725617 | 61725770 | BEST1   |
| chr11 | 61726969 | 61727050 | BEST1   |
| chr11 | 61727363 | 61727515 | BEST1   |
| chr11 | 61729726 | 61730365 | BEST1   |
| chr11 | 61731575 | 61731939 | BEST1   |
| chr6  | 31895265 | 31895575 | C2      |
| chr6  | 31895731 | 31895941 | C2      |
| chr6  | 31896508 | 31896694 | C2      |
| chr6  | 31901386 | 31901560 | C2      |
| chr6  | 31901643 | 31901742 | C2      |
| chr6  | 31901942 | 31902076 | C2      |
| chr6  | 31903699 | 31903838 | C2      |
| chr6  | 31905095 | 31905236 | C2      |
| chr6  | 31907007 | 31907097 | C2      |
| chr6  | 31910735 | 31910876 | C2      |
| chr6  | 31911001 | 31911096 | C2      |
| chr6  | 31911192 | 31911304 | C2      |
| chr6  | 31911420 | 31911586 | C2      |
| chr6  | 31911693 | 31911770 | C2      |
| chr6  | 31911911 | 31912003 | C2      |
| chr6  | 31912503 | 31912630 | C2      |
| chr6  | 31912756 | 31912806 | C2      |
| chr6  | 31912954 | 31913448 | C2      |
| chr2  | 29284557 | 29287933 | C2ORF71 |
| chr2  | 29293459 | 29297127 | C2ORF71 |
| chr19 | 6677845  | 6678034  | C3      |
| chr19 | 6678162  | 6678298  | C3      |
| chr19 | 6678382  | 6678466  | C3      |
| chr19 | 6679135  | 6679219  | C3      |
| chr19 | 6679417  | 6679507  | C3      |
| chr19 | 6680168  | 6680274  | C3      |
| chr19 | 6681951  | 6682041  | C3      |
| chr19 | 6682152  | 6682240  | C3      |
| chr19 | 6684398  | 6684450  | C3      |
| chr19 | 6684570  | 6684661  | C3      |

|       |          |          |         |
|-------|----------|----------|---------|
| chr19 | 6684785  | 6684845  | C3      |
| chr19 | 6684998  | 6685157  | C3      |
| chr19 | 6686134  | 6686298  | C3      |
| chr19 | 6686756  | 6686913  | C3      |
| chr19 | 6690639  | 6690738  | C3      |
| chr19 | 6692934  | 6693094  | C3      |
| chr19 | 6693422  | 6693498  | C3      |
| chr19 | 6694441  | 6694645  | C3      |
| chr19 | 6696389  | 6696476  | C3      |
| chr19 | 6696603  | 6696670  | C3      |
| chr19 | 6697354  | 6697567  | C3      |
| chr19 | 6697662  | 6697805  | C3      |
| chr19 | 6702137  | 6702223  | C3      |
| chr19 | 6702481  | 6702590  | C3      |
| chr19 | 6707086  | 6707284  | C3      |
| chr19 | 6707476  | 6707548  | C3      |
| chr19 | 6707810  | 6707940  | C3      |
| chr19 | 6709694  | 6709853  | C3      |
| chr19 | 6710649  | 6710856  | C3      |
| chr19 | 6710997  | 6711207  | C3      |
| chr19 | 6712267  | 6712417  | C3      |
| chr19 | 6712518  | 6712634  | C3      |
| chr19 | 6713199  | 6713326  | C3      |
| chr19 | 6713417  | 6713520  | C3      |
| chr19 | 6714002  | 6714093  | C3      |
| chr19 | 6714176  | 6714259  | C3      |
| chr19 | 6714362  | 6714457  | C3      |
| chr19 | 6718104  | 6718175  | C3      |
| chr19 | 6718257  | 6718423  | C3      |
| chr19 | 6719221  | 6719414  | C3      |
| chr19 | 6720526  | 6720662  | C3      |
| chr17 | 58227301 | 58227453 | CA4     |
| chr17 | 58232674 | 58232728 | CA4     |
| chr17 | 58233920 | 58234076 | CA4     |
| chr17 | 58234787 | 58234933 | CA4     |
| chr17 | 58235050 | 58235149 | CA4     |
| chr17 | 58235421 | 58235488 | CA4     |
| chr17 | 58235643 | 58235807 | CA4     |
| chr17 | 58236590 | 58236906 | CA4     |
| chr11 | 67222817 | 67223260 | CABP4   |
| chr11 | 67223658 | 67223689 | CABP4   |
| chr11 | 67223769 | 67223913 | CABP4   |
| chr11 | 67225043 | 67225153 | CABP4   |
| chr11 | 67225841 | 67225989 | CABP4   |
| chr11 | 67226101 | 67229243 | CABP4   |
| chrX  | 49061522 | 49061827 | CACNA1F |
| chrX  | 49062075 | 49062273 | CACNA1F |



|       |          |          |          |
|-------|----------|----------|----------|
| chrX  | 49062971 | 49063084 | CACNA1F  |
| chrX  | 49063188 | 49063316 | CACNA1F  |
| chrX  | 49063465 | 49063573 | CACNA1F  |
| chrX  | 49064974 | 49065144 | CACNA1F  |
| chrX  | 49065721 | 49065853 | CACNA1F  |
| chrX  | 49066088 | 49066219 | CACNA1F  |
| chrX  | 49066400 | 49066502 | CACNA1F  |
| chrX  | 49066760 | 49066863 | CACNA1F  |
| chrX  | 49067049 | 49067146 | CACNA1F  |
| chrX  | 49067424 | 49067552 | CACNA1F  |
| chrX  | 49067781 | 49067941 | CACNA1F  |
| chrX  | 49068357 | 49068449 | CACNA1F  |
| chrX  | 49068702 | 49068768 | CACNA1F  |
| chrX  | 49069126 | 49069255 | CACNA1F  |
| chrX  | 49069433 | 49069454 | CACNA1F  |
| chrX  | 49070278 | 49070362 | CACNA1F  |
| chrX  | 49070618 | 49070729 | CACNA1F  |
| chrX  | 49071545 | 49071704 | CACNA1F  |
| chrX  | 49071801 | 49072003 | CACNA1F  |
| chrX  | 49072841 | 49072988 | CACNA1F  |
| chrX  | 49074213 | 49074266 | CACNA1F  |
| chrX  | 49074356 | 49074464 | CACNA1F  |
| chrX  | 49074913 | 49075001 | CACNA1F  |
| chrX  | 49075087 | 49075194 | CACNA1F  |
| chrX  | 49075340 | 49075400 | CACNA1F  |
| chrX  | 49075779 | 49075909 | CACNA1F  |
| chrX  | 49076092 | 49076249 | CACNA1F  |
| chrX  | 49076931 | 49076983 | CACNA1F  |
| chrX  | 49077493 | 49077539 | CACNA1F  |
| chrX  | 49078980 | 49079062 | CACNA1F  |
| chrX  | 49079176 | 49079297 | CACNA1F  |
| chrX  | 49079387 | 49079595 | CACNA1F  |
| chrX  | 49081222 | 49081448 | CACNA1F  |
| chrX  | 49082370 | 49082531 | CACNA1F  |
| chrX  | 49082678 | 49082705 | CACNA1F  |
| chrX  | 49082870 | 49082964 | CACNA1F  |
| chrX  | 49083071 | 49083164 | CACNA1F  |
| chrX  | 49083398 | 49083589 | CACNA1F  |
| chrX  | 49084497 | 49084601 | CACNA1F  |
| chrX  | 49084712 | 49084909 | CACNA1F  |
| chrX  | 49086681 | 49086834 | CACNA1F  |
| chrX  | 49086928 | 49087071 | CACNA1F  |
| chrX  | 49087311 | 49087451 | CACNA1F  |
| chrX  | 49087663 | 49087769 | CACNA1F  |
| chrX  | 49088139 | 49088389 | CACNA1F  |
| chrX  | 49089746 | 49089833 | CACNA1F  |
| chr12 | 1901122  | 1902925  | CACNA2D4 |

|       |          |          |          |
|-------|----------|----------|----------|
| chr12 | 1904464  | 1904545  | CACNA2D4 |
| chr12 | 1904831  | 1904946  | CACNA2D4 |
| chr12 | 1906583  | 1906701  | CACNA2D4 |
| chr12 | 1908840  | 1908861  | CACNA2D4 |
| chr12 | 1909165  | 1909218  | CACNA2D4 |
| chr12 | 1909551  | 1909604  | CACNA2D4 |
| chr12 | 1910208  | 1910284  | CACNA2D4 |
| chr12 | 1910739  | 1910810  | CACNA2D4 |
| chr12 | 1919443  | 1919506  | CACNA2D4 |
| chr12 | 1919708  | 1919753  | CACNA2D4 |
| chr12 | 1920827  | 1920889  | CACNA2D4 |
| chr12 | 1949904  | 1949985  | CACNA2D4 |
| chr12 | 1953567  | 1953695  | CACNA2D4 |
| chr12 | 1955759  | 1955855  | CACNA2D4 |
| chr12 | 1963116  | 1963210  | CACNA2D4 |
| chr12 | 1965177  | 1965275  | CACNA2D4 |
| chr12 | 1965349  | 1965395  | CACNA2D4 |
| chr12 | 1967742  | 1967810  | CACNA2D4 |
| chr12 | 1969310  | 1969372  | CACNA2D4 |
| chr12 | 1983769  | 1983841  | CACNA2D4 |
| chr12 | 1984416  | 1984503  | CACNA2D4 |
| chr12 | 1987480  | 1987555  | CACNA2D4 |
| chr12 | 1988121  | 1988202  | CACNA2D4 |
| chr12 | 1988969  | 1989047  | CACNA2D4 |
| chr12 | 1992032  | 1992166  | CACNA2D4 |
| chr12 | 1993408  | 1993487  | CACNA2D4 |
| chr12 | 1993933  | 1994047  | CACNA2D4 |
| chr12 | 1994152  | 1994242  | CACNA2D4 |
| chr12 | 1995130  | 1995205  | CACNA2D4 |
| chr12 | 1995388  | 1995539  | CACNA2D4 |
| chr12 | 1996174  | 1996235  | CACNA2D4 |
| chr12 | 2016605  | 2016737  | CACNA2D4 |
| chr12 | 2017040  | 2017203  | CACNA2D4 |
| chr12 | 2019071  | 2019131  | CACNA2D4 |
| chr12 | 2022188  | 2022305  | CACNA2D4 |
| chr12 | 2024019  | 2024101  | CACNA2D4 |
| chr12 | 2027412  | 2027870  | CACNA2D4 |
| chr4  | 15471488 | 15471681 | CC2D2A   |
| chr4  | 15474845 | 15474879 | CC2D2A   |
| chr4  | 15477538 | 15477595 | CC2D2A   |
| chr4  | 15480346 | 15480430 | CC2D2A   |
| chr4  | 15482327 | 15482451 | CC2D2A   |
| chr4  | 15504051 | 15504140 | CC2D2A   |
| chr4  | 15504444 | 15504546 | CC2D2A   |
| chr4  | 15511761 | 15511863 | CC2D2A   |
| chr4  | 15512869 | 15513046 | CC2D2A   |
| chr4  | 15516329 | 15516492 | CC2D2A   |

|       |          |          |        |
|-------|----------|----------|--------|
| chr4  | 15517490 | 15517627 | CC2D2A |
| chr4  | 15518247 | 15518379 | CC2D2A |
| chr4  | 15529069 | 15529279 | CC2D2A |
| chr4  | 15530242 | 15530349 | CC2D2A |
| chr4  | 15534815 | 15534956 | CC2D2A |
| chr4  | 15538542 | 15538699 | CC2D2A |
| chr4  | 15539521 | 15539760 | CC2D2A |
| chr4  | 15542459 | 15542637 | CC2D2A |
| chr4  | 15552446 | 15552603 | CC2D2A |
| chr4  | 15554780 | 15554928 | CC2D2A |
| chr4  | 15556694 | 15556833 | CC2D2A |
| chr4  | 15558926 | 15559130 | CC2D2A |
| chr4  | 15560787 | 15560880 | CC2D2A |
| chr4  | 15562153 | 15562245 | CC2D2A |
| chr4  | 15564977 | 15565145 | CC2D2A |
| chr4  | 15568999 | 15569105 | CC2D2A |
| chr4  | 15569299 | 15569409 | CC2D2A |
| chr4  | 15570915 | 15571012 | CC2D2A |
| chr4  | 15572020 | 15572119 | CC2D2A |
| chr4  | 15575772 | 15575949 | CC2D2A |
| chr4  | 15581590 | 15581794 | CC2D2A |
| chr4  | 15587779 | 15587869 | CC2D2A |
| chr4  | 15589438 | 15589552 | CC2D2A |
| chr4  | 15591167 | 15591302 | CC2D2A |
| chr4  | 15597707 | 15597830 | CC2D2A |
| chr4  | 15599029 | 15599088 | CC2D2A |
| chr4  | 15601151 | 15601329 | CC2D2A |
| chr4  | 15602859 | 15603180 | CC2D2A |
| chr10 | 73555527 | 73555836 | CDH23  |
| chr10 | 73556860 | 73556977 | CDH23  |
| chr10 | 73558110 | 73558335 | CDH23  |
| chr10 | 73558867 | 73559037 | CDH23  |
| chr10 | 73559248 | 73559386 | CDH23  |
| chr10 | 73560392 | 73560512 | CDH23  |
| chr10 | 73562654 | 73562832 | CDH23  |
| chr10 | 73562965 | 73563177 | CDH23  |
| chr10 | 73565562 | 73565754 | CDH23  |
| chr10 | 73565924 | 73566038 | CDH23  |
| chr10 | 73567033 | 73567163 | CDH23  |
| chr10 | 73567272 | 73567524 | CDH23  |
| chr10 | 73567602 | 73567764 | CDH23  |
| chr10 | 73569576 | 73569833 | CDH23  |
| chr10 | 73570228 | 73570326 | CDH23  |
| chr10 | 73571071 | 73571192 | CDH23  |
| chr10 | 73571267 | 73571347 | CDH23  |
| chr10 | 73571469 | 73571510 | CDH23  |
| chr10 | 73571711 | 73571772 | CDH23  |

|       |          |          |        |
|-------|----------|----------|--------|
| chr10 | 73572236 | 73572366 | CDH23  |
| chr10 | 73572524 | 73572647 | CDH23  |
| chr10 | 73573000 | 73573105 | CDH23  |
| chr10 | 73574708 | 73575702 | CDH23  |
| chr16 | 68678150 | 68679327 | CDH3   |
| chr16 | 68679538 | 68679653 | CDH3   |
| chr16 | 68710287 | 68710373 | CDH3   |
| chr16 | 68712036 | 68712180 | CDH3   |
| chr16 | 68712403 | 68712559 | CDH3   |
| chr16 | 68712664 | 68712809 | CDH3   |
| chr16 | 68713701 | 68713877 | CDH3   |
| chr16 | 68714870 | 68714999 | CDH3   |
| chr16 | 68716204 | 68716390 | CDH3   |
| chr16 | 68718485 | 68718727 | CDH3   |
| chr16 | 68719107 | 68719253 | CDH3   |
| chr16 | 68721414 | 68721639 | CDH3   |
| chr16 | 68725622 | 68725829 | CDH3   |
| chr16 | 68729157 | 68729288 | CDH3   |
| chr16 | 68729679 | 68729826 | CDH3   |
| chr16 | 68732093 | 68732957 | CDH3   |
| chr10 | 85954411 | 85954571 | CDHR1  |
| chr10 | 85955249 | 85955345 | CDHR1  |
| chr10 | 85956260 | 85956406 | CDHR1  |
| chr10 | 85957541 | 85957592 | CDHR1  |
| chr10 | 85958787 | 85958877 | CDHR1  |
| chr10 | 85960356 | 85960443 | CDHR1  |
| chr10 | 85961562 | 85961676 | CDHR1  |
| chr10 | 85962735 | 85962879 | CDHR1  |
| chr10 | 85964282 | 85964361 | CDHR1  |
| chr10 | 85965582 | 85965683 | CDHR1  |
| chr10 | 85967929 | 85968133 | CDHR1  |
| chr10 | 85968484 | 85968637 | CDHR1  |
| chr10 | 85970756 | 85970921 | CDHR1  |
| chr10 | 85971403 | 85971471 | CDHR1  |
| chr10 | 85971934 | 85972163 | CDHR1  |
| chr10 | 85972846 | 85973104 | CDHR1  |
| chr10 | 85978834 | 85979374 | CDHR1  |
| chr12 | 88442789 | 88443191 | CEP290 |
| chr12 | 88444130 | 88444210 | CEP290 |
| chr12 | 88447428 | 88447523 | CEP290 |
| chr12 | 88448116 | 88448190 | CEP290 |
| chr12 | 88449352 | 88449494 | CEP290 |
| chr12 | 88452624 | 88452797 | CEP290 |
| chr12 | 88453674 | 88453797 | CEP290 |
| chr12 | 88454606 | 88454771 | CEP290 |
| chr12 | 88456468 | 88456555 | CEP290 |
| chr12 | 88457757 | 88457892 | CEP290 |

|       |           |           |        |
|-------|-----------|-----------|--------|
| chr12 | 88462298  | 88462422  | CEP290 |
| chr12 | 88465070  | 88465226  | CEP290 |
| chr12 | 88465557  | 88465703  | CEP290 |
| chr12 | 88470998  | 88471121  | CEP290 |
| chr12 | 88471473  | 88471695  | CEP290 |
| chr12 | 88472868  | 88473006  | CEP290 |
| chr12 | 88473958  | 88474172  | CEP290 |
| chr12 | 88476807  | 88477007  | CEP290 |
| chr12 | 88477623  | 88477731  | CEP290 |
| chr12 | 88478362  | 88478629  | CEP290 |
| chr12 | 88479815  | 88479950  | CEP290 |
| chr12 | 88480167  | 88480275  | CEP290 |
| chr12 | 88481556  | 88481721  | CEP290 |
| chr12 | 88482808  | 88483264  | CEP290 |
| chr12 | 88484504  | 88484616  | CEP290 |
| chr12 | 88486457  | 88486609  | CEP290 |
| chr12 | 88487546  | 88487752  | CEP290 |
| chr12 | 88490664  | 88490776  | CEP290 |
| chr12 | 88496614  | 88496788  | CEP290 |
| chr12 | 88500451  | 88500682  | CEP290 |
| chr12 | 88500772  | 88500875  | CEP290 |
| chr12 | 88502842  | 88502958  | CEP290 |
| chr12 | 88504978  | 88505128  | CEP290 |
| chr12 | 88505470  | 88505635  | CEP290 |
| chr12 | 88508196  | 88508339  | CEP290 |
| chr12 | 88508874  | 88508959  | CEP290 |
| chr12 | 88510809  | 88510922  | CEP290 |
| chr12 | 88512259  | 88512347  | CEP290 |
| chr12 | 88512419  | 88512520  | CEP290 |
| chr12 | 88513890  | 88514053  | CEP290 |
| chr12 | 88514773  | 88514943  | CEP290 |
| chr12 | 88519022  | 88519146  | CEP290 |
| chr12 | 88520092  | 88520215  | CEP290 |
| chr12 | 88522722  | 88522812  | CEP290 |
| chr12 | 88523470  | 88523653  | CEP290 |
| chr12 | 88524044  | 88524197  | CEP290 |
| chr12 | 88524321  | 88524342  | CEP290 |
| chr12 | 88524941  | 88524995  | CEP290 |
| chr12 | 88530419  | 88530563  | CEP290 |
| chr12 | 88532921  | 88532968  | CEP290 |
| chr12 | 88533271  | 88533341  | CEP290 |
| chr12 | 88534732  | 88534810  | CEP290 |
| chr12 | 88534982  | 88535111  | CEP290 |
| chr12 | 88535676  | 88535993  | CEP290 |
| chr2  | 182401402 | 182402971 | CERKL  |
| chr2  | 182403818 | 182403991 | CERKL  |
| chr2  | 182409426 | 182409523 | CERKL  |

|      |           |           |       |
|------|-----------|-----------|-------|
| chr2 | 182412344 | 182412453 | CERKL |
| chr2 | 182412548 | 182412574 | CERKL |
| chr2 | 182413271 | 182413331 | CERKL |
| chr2 | 182413406 | 182413584 | CERKL |
| chr2 | 182414360 | 182414435 | CERKL |
| chr2 | 182423292 | 182423435 | CERKL |
| chr2 | 182468563 | 182468806 | CERKL |
| chr2 | 182521495 | 182521834 | CERKL |
| chr6 | 31913720  | 31914062  | CFB   |
| chr6 | 31914149  | 31914383  | CFB   |
| chr6 | 31914783  | 31914969  | CFB   |
| chr6 | 31915124  | 31915298  | CFB   |
| chr6 | 31915518  | 31915620  | CFB   |
| chr6 | 31915721  | 31915858  | CFB   |
| chr6 | 31916150  | 31916289  | CFB   |
| chr6 | 31916606  | 31916738  | CFB   |
| chr6 | 31917019  | 31917121  | CFB   |
| chr6 | 31917196  | 31917334  | CFB   |
| chr6 | 31917826  | 31917924  | CFB   |
| chr6 | 31918062  | 31918180  | CFB   |
| chr6 | 31918395  | 31918549  | CFB   |
| chr6 | 31918644  | 31918721  | CFB   |
| chr6 | 31918920  | 31919021  | CFB   |
| chr6 | 31919117  | 31919250  | CFB   |
| chr6 | 31919331  | 31919381  | CFB   |
| chr6 | 31919651  | 31919861  | CFB   |
| chr1 | 196621007 | 196621305 | CFH   |
| chr1 | 196642107 | 196642293 | CFH   |
| chr1 | 196642986 | 196643092 | CFH   |
| chr1 | 196645118 | 196645195 | CFH   |
| chr1 | 196646605 | 196646797 | CFH   |
| chr1 | 196648752 | 196648923 | CFH   |
| chr1 | 196654193 | 196654367 | CFH   |
| chr1 | 196658549 | 196658744 | CFH   |
| chr1 | 196659192 | 196659369 | CFH   |
| chr1 | 196682864 | 196683047 | CFH   |
| chr1 | 196684722 | 196684899 | CFH   |
| chr1 | 196694250 | 196694427 | CFH   |
| chr1 | 196695599 | 196695782 | CFH   |
| chr1 | 196695890 | 196696070 | CFH   |
| chr1 | 196697475 | 196697652 | CFH   |
| chr1 | 196705953 | 196706136 | CFH   |
| chr1 | 196706604 | 196706790 | CFH   |
| chr1 | 196709748 | 196709922 | CFH   |
| chr1 | 196711004 | 196711181 | CFH   |
| chr1 | 196712581 | 196712758 | CFH   |
| chr1 | 196714946 | 196715129 | CFH   |

|       |           |           |       |
|-------|-----------|-----------|-------|
| chr1  | 196716240 | 196716634 | CFH   |
| chrX  | 85116184  | 85119826  | CHM   |
| chrX  | 85128056  | 85128217  | CHM   |
| chrX  | 85133969  | 85134068  | CHM   |
| chrX  | 85149192  | 85149289  | CHM   |
| chrX  | 85155650  | 85155714  | CHM   |
| chrX  | 85156088  | 85156193  | CHM   |
| chrX  | 85166265  | 85166343  | CHM   |
| chrX  | 85211157  | 85211383  | CHM   |
| chrX  | 85212859  | 85212980  | CHM   |
| chrX  | 85213865  | 85213982  | CHM   |
| chrX  | 85218669  | 85219057  | CHM   |
| chrX  | 85233770  | 85233895  | CHM   |
| chrX  | 85236740  | 85236813  | CHM   |
| chrX  | 85282494  | 85282561  | CHM   |
| chrX  | 85302487  | 85302566  | CHM   |
| chr16 | 28488599  | 28488956  | CLN3  |
| chr16 | 28489057  | 28489198  | CLN3  |
| chr16 | 28493425  | 28493519  | CLN3  |
| chr16 | 28493647  | 28493703  | CLN3  |
| chr16 | 28493797  | 28493866  | CLN3  |
| chr16 | 28493946  | 28493993  | CLN3  |
| chr16 | 28495326  | 28495439  | CLN3  |
| chr16 | 28497667  | 28497811  | CLN3  |
| chr16 | 28497898  | 28497971  | CLN3  |
| chr16 | 28498776  | 28498862  | CLN3  |
| chr16 | 28498982  | 28499062  | CLN3  |
| chr16 | 28499911  | 28499983  | CLN3  |
| chr16 | 28500610  | 28500707  | CLN3  |
| chr16 | 28502802  | 28502881  | CLN3  |
| chr16 | 28503034  | 28503156  | CLN3  |
| chr16 | 28503340  | 28503623  | CLN3  |
| chr3  | 150643949 | 150644659 | CLRN1 |
| chr3  | 150645851 | 150645988 | CLRN1 |
| chr3  | 150659368 | 150659548 | CLRN1 |
| chr3  | 150661606 | 150662023 | CLRN1 |
| chr4  | 47937993  | 47939846  | CNGA1 |
| chr4  | 47942779  | 47942886  | CNGA1 |
| chr4  | 47944057  | 47944165  | CNGA1 |
| chr4  | 47945197  | 47945305  | CNGA1 |
| chr4  | 47945387  | 47945429  | CNGA1 |
| chr4  | 47951849  | 47951912  | CNGA1 |
| chr4  | 47953369  | 47953486  | CNGA1 |
| chr4  | 47954599  | 47954720  | CNGA1 |
| chr4  | 47972912  | 47973117  | CNGA1 |
| chr4  | 47983409  | 47983550  | CNGA1 |
| chr2  | 98962617  | 98962997  | CNGA3 |

|       |          |          |       |
|-------|----------|----------|-------|
| chr2  | 98986401 | 98986539 | CNGA3 |
| chr2  | 98994149 | 98994263 | CNGA3 |
| chr2  | 98996637 | 98996817 | CNGA3 |
| chr2  | 98999850 | 98999904 | CNGA3 |
| chr2  | 99006120 | 99006237 | CNGA3 |
| chr2  | 99008326 | 99008433 | CNGA3 |
| chr2  | 99012306 | 99015064 | CNGA3 |
| chr16 | 57916243 | 57918361 | CNGB1 |
| chr16 | 57921758 | 57921978 | CNGB1 |
| chr16 | 57931300 | 57931447 | CNGB1 |
| chr16 | 57931699 | 57931818 | CNGB1 |
| chr16 | 57935255 | 57935339 | CNGB1 |
| chr16 | 57935431 | 57935529 | CNGB1 |
| chr16 | 57937725 | 57937885 | CNGB1 |
| chr16 | 57938637 | 57938779 | CNGB1 |
| chr16 | 57945656 | 57945779 | CNGB1 |
| chr16 | 57946833 | 57946898 | CNGB1 |
| chr16 | 57949152 | 57949239 | CNGB1 |
| chr16 | 57950032 | 57950083 | CNGB1 |
| chr16 | 57951171 | 57951380 | CNGB1 |
| chr16 | 57953002 | 57953158 | CNGB1 |
| chr16 | 57954290 | 57954448 | CNGB1 |
| chr16 | 57957176 | 57957284 | CNGB1 |
| chr16 | 57965619 | 57965782 | CNGB1 |
| chr16 | 57973333 | 57973496 | CNGB1 |
| chr16 | 57974137 | 57974225 | CNGB1 |
| chr16 | 57983256 | 57983343 | CNGB1 |
| chr16 | 57984284 | 57984444 | CNGB1 |
| chr16 | 57991244 | 57991281 | CNGB1 |
| chr16 | 57992313 | 57992389 | CNGB1 |
| chr16 | 57993791 | 57993969 | CNGB1 |
| chr16 | 57994385 | 57994434 | CNGB1 |
| chr16 | 57994743 | 57994819 | CNGB1 |
| chr16 | 57996468 | 57996514 | CNGB1 |
| chr16 | 57996745 | 57996776 | CNGB1 |
| chr16 | 57996877 | 57996968 | CNGB1 |
| chr16 | 57998033 | 57998106 | CNGB1 |
| chr16 | 57998390 | 57998448 | CNGB1 |
| chr16 | 58001031 | 58001198 | CNGB1 |
| chr16 | 58004963 | 58005020 | CNGB1 |
| chr8  | 87586163 | 87588358 | CNGB3 |
| chr8  | 87590916 | 87591091 | CNGB3 |
| chr8  | 87591333 | 87591480 | CNGB3 |
| chr8  | 87616320 | 87616439 | CNGB3 |
| chr8  | 87623815 | 87623899 | CNGB3 |
| chr8  | 87638210 | 87638308 | CNGB3 |
| chr8  | 87641146 | 87641306 | CNGB3 |



|      |           |           |         |
|------|-----------|-----------|---------|
| chr8 | 87644979  | 87645121  | CNGB3   |
| chr8 | 87655978  | 87656101  | CNGB3   |
| chr8 | 87656849  | 87656914  | CNGB3   |
| chr8 | 87660028  | 87660115  | CNGB3   |
| chr8 | 87666239  | 87666290  | CNGB3   |
| chr8 | 87679152  | 87679361  | CNGB3   |
| chr8 | 87680246  | 87680396  | CNGB3   |
| chr8 | 87683171  | 87683326  | CNGB3   |
| chr8 | 87738758  | 87738885  | CNGB3   |
| chr8 | 87751882  | 87751964  | CNGB3   |
| chr8 | 87755726  | 87755903  | CNGB3   |
| chr2 | 97426638  | 97428138  | CNNM4   |
| chr2 | 97462748  | 97462892  | CNNM4   |
| chr2 | 97463249  | 97463384  | CNNM4   |
| chr2 | 97464793  | 97464963  | CNNM4   |
| chr2 | 97465288  | 97465385  | CNNM4   |
| chr2 | 97474297  | 97474479  | CNNM4   |
| chr2 | 97475056  | 97477628  | CNNM4   |
| chr1 | 103342022 | 103343721 | COL11A1 |
| chr1 | 103345238 | 103345472 | COL11A1 |
| chr1 | 103347252 | 103347321 | COL11A1 |
| chr1 | 103348754 | 103348867 | COL11A1 |
| chr1 | 103352362 | 103352612 | COL11A1 |
| chr1 | 103354132 | 103354186 | COL11A1 |
| chr1 | 103354278 | 103354314 | COL11A1 |
| chr1 | 103354421 | 103354475 | COL11A1 |
| chr1 | 103355010 | 103355118 | COL11A1 |
| chr1 | 103356006 | 103356060 | COL11A1 |
| chr1 | 103363680 | 103363734 | COL11A1 |
| chr1 | 103364221 | 103364329 | COL11A1 |
| chr1 | 103364496 | 103364550 | COL11A1 |
| chr1 | 103377714 | 103377768 | COL11A1 |
| chr1 | 103379192 | 103379246 | COL11A1 |
| chr1 | 103379907 | 103379961 | COL11A1 |
| chr1 | 103380259 | 103380367 | COL11A1 |
| chr1 | 103381186 | 103381240 | COL11A1 |
| chr1 | 103385866 | 103385920 | COL11A1 |
| chr1 | 103387073 | 103387127 | COL11A1 |
| chr1 | 103388891 | 103388945 | COL11A1 |
| chr1 | 103400004 | 103400112 | COL11A1 |
| chr1 | 103400615 | 103400669 | COL11A1 |
| chr1 | 103404590 | 103404644 | COL11A1 |
| chr1 | 103405882 | 103405990 | COL11A1 |
| chr1 | 103412404 | 103412512 | COL11A1 |
| chr1 | 103427421 | 103427475 | COL11A1 |
| chr1 | 103427731 | 103427821 | COL11A1 |
| chr1 | 103428208 | 103428316 | COL11A1 |

|       |           |           |         |
|-------|-----------|-----------|---------|
| chr1  | 103431042 | 103431096 | COL11A1 |
| chr1  | 103435774 | 103435828 | COL11A1 |
| chr1  | 103440385 | 103440439 | COL11A1 |
| chr1  | 103444263 | 103444308 | COL11A1 |
| chr1  | 103444415 | 103444469 | COL11A1 |
| chr1  | 103444615 | 103444660 | COL11A1 |
| chr1  | 103444937 | 103444991 | COL11A1 |
| chr1  | 103449693 | 103449747 | COL11A1 |
| chr1  | 103453188 | 103453296 | COL11A1 |
| chr1  | 103455073 | 103455127 | COL11A1 |
| chr1  | 103461419 | 103461464 | COL11A1 |
| chr1  | 103461544 | 103461598 | COL11A1 |
| chr1  | 103462635 | 103462680 | COL11A1 |
| chr1  | 103463865 | 103463919 | COL11A1 |
| chr1  | 103467480 | 103467525 | COL11A1 |
| chr1  | 103467983 | 103468037 | COL11A1 |
| chr1  | 103468302 | 103468347 | COL11A1 |
| chr1  | 103468770 | 103468824 | COL11A1 |
| chr1  | 103469999 | 103470044 | COL11A1 |
| chr1  | 103470163 | 103470217 | COL11A1 |
| chr1  | 103471393 | 103471447 | COL11A1 |
| chr1  | 103471623 | 103471677 | COL11A1 |
| chr1  | 103471817 | 103471871 | COL11A1 |
| chr1  | 103474018 | 103474072 | COL11A1 |
| chr1  | 103477968 | 103478025 | COL11A1 |
| chr1  | 103480066 | 103480150 | COL11A1 |
| chr1  | 103481223 | 103481298 | COL11A1 |
| chr1  | 103483375 | 103483438 | COL11A1 |
| chr1  | 103484373 | 103484415 | COL11A1 |
| chr1  | 103487262 | 103487325 | COL11A1 |
| chr1  | 103488297 | 103488552 | COL11A1 |
| chr1  | 103491076 | 103491169 | COL11A1 |
| chr1  | 103491355 | 103491508 | COL11A1 |
| chr1  | 103496671 | 103496800 | COL11A1 |
| chr1  | 103540173 | 103540336 | COL11A1 |
| chr1  | 103544213 | 103544427 | COL11A1 |
| chr1  | 103548360 | 103548528 | COL11A1 |
| chr1  | 103573628 | 103574052 | COL11A1 |
| chr12 | 48366747  | 48367336  | COL2A1  |
| chr12 | 48367871  | 48368114  | COL2A1  |
| chr12 | 48368457  | 48368645  | COL2A1  |
| chr12 | 48369099  | 48369388  | COL2A1  |
| chr12 | 48369745  | 48369853  | COL2A1  |
| chr12 | 48370296  | 48370350  | COL2A1  |
| chr12 | 48370594  | 48370702  | COL2A1  |
| chr12 | 48370884  | 48370938  | COL2A1  |
| chr12 | 48371102  | 48371210  | COL2A1  |

|       |          |          |        |
|-------|----------|----------|--------|
| chr12 | 48371382 | 48371436 | COL2A1 |
| chr12 | 48371792 | 48371900 | COL2A1 |
| chr12 | 48372073 | 48372181 | COL2A1 |
| chr12 | 48372379 | 48372541 | COL2A1 |
| chr12 | 48373293 | 48373347 | COL2A1 |
| chr12 | 48373791 | 48373845 | COL2A1 |
| chr12 | 48374336 | 48374444 | COL2A1 |
| chr12 | 48374697 | 48374751 | COL2A1 |
| chr12 | 48375125 | 48375179 | COL2A1 |
| chr12 | 48375558 | 48375612 | COL2A1 |
| chr12 | 48375889 | 48375943 | COL2A1 |
| chr12 | 48376284 | 48376392 | COL2A1 |
| chr12 | 48376630 | 48376729 | COL2A1 |
| chr12 | 48376875 | 48376920 | COL2A1 |
| chr12 | 48377167 | 48377221 | COL2A1 |
| chr12 | 48377465 | 48377519 | COL2A1 |
| chr12 | 48377869 | 48377923 | COL2A1 |
| chr12 | 48378328 | 48378382 | COL2A1 |
| chr12 | 48378777 | 48378876 | COL2A1 |
| chr12 | 48379316 | 48379370 | COL2A1 |
| chr12 | 48379510 | 48379609 | COL2A1 |
| chr12 | 48379694 | 48379748 | COL2A1 |
| chr12 | 48380118 | 48380226 | COL2A1 |
| chr12 | 48380617 | 48380671 | COL2A1 |
| chr12 | 48380860 | 48380959 | COL2A1 |
| chr12 | 48381051 | 48381096 | COL2A1 |
| chr12 | 48381393 | 48381492 | COL2A1 |
| chr12 | 48383010 | 48383064 | COL2A1 |
| chr12 | 48383543 | 48383588 | COL2A1 |
| chr12 | 48386660 | 48386714 | COL2A1 |
| chr12 | 48387240 | 48387285 | COL2A1 |
| chr12 | 48387591 | 48387645 | COL2A1 |
| chr12 | 48387776 | 48387830 | COL2A1 |
| chr12 | 48388206 | 48388260 | COL2A1 |
| chr12 | 48389037 | 48389091 | COL2A1 |
| chr12 | 48389492 | 48389546 | COL2A1 |
| chr12 | 48389657 | 48389702 | COL2A1 |
| chr12 | 48390330 | 48390408 | COL2A1 |
| chr12 | 48391388 | 48391490 | COL2A1 |
| chr12 | 48391653 | 48391707 | COL2A1 |
| chr12 | 48391814 | 48391847 | COL2A1 |
| chr12 | 48391951 | 48391984 | COL2A1 |
| chr12 | 48392197 | 48392214 | COL2A1 |
| chr12 | 48398019 | 48398285 | COL2A1 |
| chr6  | 70925742 | 70926784 | COL9A1 |
| chr6  | 70935634 | 70935712 | COL9A1 |
| chr6  | 70942285 | 70942474 | COL9A1 |

|       |           |           |        |
|-------|-----------|-----------|--------|
| chr6  | 70944241  | 70944296  | COL9A1 |
| chr6  | 70944496  | 70944643  | COL9A1 |
| chr6  | 70948956  | 70948989  | COL9A1 |
| chr6  | 70950391  | 70950436  | COL9A1 |
| chr6  | 70951121  | 70951157  | COL9A1 |
| chr6  | 70951666  | 70951738  | COL9A1 |
| chr6  | 70952364  | 70952418  | COL9A1 |
| chr6  | 70961822  | 70961876  | COL9A1 |
| chr6  | 70961964  | 70962018  | COL9A1 |
| chr6  | 70963087  | 70963132  | COL9A1 |
| chr6  | 70964178  | 70964232  | COL9A1 |
| chr6  | 70964665  | 70964719  | COL9A1 |
| chr6  | 70964852  | 70964906  | COL9A1 |
| chr6  | 70965039  | 70965093  | COL9A1 |
| chr6  | 70966470  | 70966524  | COL9A1 |
| chr6  | 70970359  | 70970413  | COL9A1 |
| chr6  | 70972946  | 70973000  | COL9A1 |
| chr6  | 70976419  | 70976473  | COL9A1 |
| chr6  | 70978506  | 70978563  | COL9A1 |
| chr6  | 70979335  | 70979368  | COL9A1 |
| chr6  | 70980016  | 70980070  | COL9A1 |
| chr6  | 70981357  | 70981411  | COL9A1 |
| chr6  | 70981767  | 70981791  | COL9A1 |
| chr6  | 70983749  | 70983785  | COL9A1 |
| chr6  | 70984421  | 70984475  | COL9A1 |
| chr6  | 70990514  | 70990577  | COL9A1 |
| chr6  | 70990706  | 70990742  | COL9A1 |
| chr6  | 70991092  | 70991167  | COL9A1 |
| chr6  | 70992683  | 70992911  | COL9A1 |
| chr1  | 197237333 | 197237612 | CRB1   |
| chr1  | 197297551 | 197298133 | CRB1   |
| chr1  | 197313410 | 197313606 | CRB1   |
| chr1  | 197316469 | 197316609 | CRB1   |
| chr1  | 197325960 | 197326143 | CRB1   |
| chr1  | 197390129 | 197391086 | CRB1   |
| chr1  | 197396583 | 197397131 | CRB1   |
| chr1  | 197398578 | 197398744 | CRB1   |
| chr1  | 197403835 | 197404742 | CRB1   |
| chr1  | 197407676 | 197407805 | CRB1   |
| chr1  | 197411295 | 197411422 | CRB1   |
| chr1  | 197446793 | 197447584 | CRB1   |
| chr19 | 48325098  | 48325267  | CRX    |
| chr19 | 48337665  | 48337800  | CRX    |
| chr19 | 48339499  | 48339651  | CRX    |
| chr19 | 48342576  | 48346586  | CRX    |
| chr4  | 187112673 | 187113191 | CYP4V2 |
| chr4  | 187115653 | 187115766 | CYP4V2 |

|      |           |           |        |
|------|-----------|-----------|--------|
| chr4 | 187117156 | 187117242 | CYP4V2 |
| chr4 | 187118093 | 187118284 | CYP4V2 |
| chr4 | 187118686 | 187118756 | CYP4V2 |
| chr4 | 187120110 | 187120237 | CYP4V2 |
| chr4 | 187122310 | 187122496 | CYP4V2 |
| chr4 | 187126353 | 187126456 | CYP4V2 |
| chr4 | 187130018 | 187130153 | CYP4V2 |
| chr4 | 187130246 | 187130426 | CYP4V2 |
| chr4 | 187131622 | 187134617 | CYP4V2 |
| chr9 | 117164360 | 117165216 | DFNB31 |
| chr9 | 117165496 | 117165619 | DFNB31 |
| chr9 | 117166175 | 117166357 | DFNB31 |
| chr9 | 117168634 | 117169172 | DFNB31 |
| chr9 | 117170226 | 117170298 | DFNB31 |
| chr9 | 117185593 | 117185803 | DFNB31 |
| chr9 | 117186613 | 117186826 | DFNB31 |
| chr9 | 117187267 | 117187304 | DFNB31 |
| chr9 | 117188490 | 117188693 | DFNB31 |
| chr9 | 117228546 | 117228672 | DFNB31 |
| chr9 | 117240832 | 117241051 | DFNB31 |
| chr9 | 117265386 | 117265495 | DFNB31 |
| chrX | 31137344  | 31140047  | DMD    |
| chrX | 31144758  | 31144790  | DMD    |
| chrX | 31152218  | 31152311  | DMD    |
| chrX | 31164407  | 31164531  | DMD    |
| chrX | 31165391  | 31165635  | DMD    |
| chrX | 31187559  | 31187718  | DMD    |
| chrX | 31190464  | 31190530  | DMD    |
| chrX | 31191655  | 31191721  | DMD    |
| chrX | 31196785  | 31196922  | DMD    |
| chrX | 31198486  | 31198598  | DMD    |
| chrX | 31200854  | 31201021  | DMD    |
| chrX | 31222077  | 31222235  | DMD    |
| chrX | 31224698  | 31224784  | DMD    |
| chrX | 31227614  | 31227816  | DMD    |
| chrX | 31241163  | 31241238  | DMD    |
| chrX | 31279071  | 31279133  | DMD    |
| chrX | 31284926  | 31285024  | DMD    |
| chr2 | 56093101  | 56094369  | EFEMP1 |
| chr2 | 56097854  | 56098050  | EFEMP1 |
| chr2 | 56098134  | 56098258  | EFEMP1 |
| chr2 | 56102080  | 56102200  | EFEMP1 |
| chr2 | 56103757  | 56103877  | EFEMP1 |
| chr2 | 56104880  | 56105000  | EFEMP1 |
| chr2 | 56108746  | 56108869  | EFEMP1 |
| chr2 | 56144799  | 56145186  | EFEMP1 |
| chr2 | 56145353  | 56145402  | EFEMP1 |

|       |          |          |        |
|-------|----------|----------|--------|
| chr2  | 56149494 | 56149582 | EFEMP1 |
| chr2  | 56150845 | 56150932 | EFEMP1 |
| chr6  | 80624528 | 80626600 | ELOVL4 |
| chr6  | 80629136 | 80629264 | ELOVL4 |
| chr6  | 80631341 | 80631513 | ELOVL4 |
| chr6  | 80634668 | 80634749 | ELOVL4 |
| chr6  | 80635910 | 80636098 | ELOVL4 |
| chr6  | 80656896 | 80657315 | ELOVL4 |
| chr10 | 50664490 | 50667280 | ERCC6  |
| chr10 | 50668418 | 50668497 | ERCC6  |
| chr10 | 50669397 | 50669602 | ERCC6  |
| chr10 | 50678227 | 50678935 | ERCC6  |
| chr10 | 50679020 | 50679166 | ERCC6  |
| chr10 | 50680421 | 50680516 | ERCC6  |
| chr10 | 50680954 | 50681074 | ERCC6  |
| chr10 | 50681522 | 50681633 | ERCC6  |
| chr10 | 50682072 | 50682288 | ERCC6  |
| chr10 | 50684260 | 50684356 | ERCC6  |
| chr10 | 50686399 | 50686516 | ERCC6  |
| chr10 | 50690732 | 50690909 | ERCC6  |
| chr10 | 50691391 | 50691562 | ERCC6  |
| chr10 | 50701162 | 50701298 | ERCC6  |
| chr10 | 50708583 | 50708742 | ERCC6  |
| chr10 | 50713929 | 50714058 | ERCC6  |
| chr10 | 50732078 | 50732823 | ERCC6  |
| chr10 | 50736462 | 50736571 | ERCC6  |
| chr10 | 50738765 | 50738886 | ERCC6  |
| chr10 | 50740588 | 50741024 | ERCC6  |
| chr10 | 50747007 | 50747147 | ERCC6  |
| chr6  | 66039170 | 66042310 | EYS    |
| chr6  | 66044872 | 66045039 | EYS    |
| chr6  | 66053930 | 66054070 | EYS    |
| chr6  | 66063350 | 66063510 | EYS    |
| chr6  | 66094278 | 66094393 | EYS    |
| chr6  | 66112370 | 66112498 | EYS    |
| chr6  | 66115066 | 66115260 | EYS    |
| chr6  | 66200486 | 66200600 | EYS    |
| chr6  | 66204555 | 66205500 | EYS    |
| chr6  | 66205751 | 66205886 | EYS    |
| chr6  | 66349670 | 66349785 | EYS    |
| chr6  | 66417027 | 66417118 | EYS    |
| chr14 | 92335754 | 92336729 | FBLN5  |
| chr14 | 92343830 | 92344026 | FBLN5  |
| chr14 | 92347635 | 92347762 | FBLN5  |
| chr14 | 92349297 | 92349420 | FBLN5  |
| chr14 | 92353536 | 92353656 | FBLN5  |
| chr14 | 92357564 | 92357681 | FBLN5  |

|       |           |           |       |
|-------|-----------|-----------|-------|
| chr14 | 92361293  | 92361416  | FBLN5 |
| chr14 | 92403290  | 92403545  | FBLN5 |
| chr14 | 92406908  | 92406960  | FBLN5 |
| chr14 | 92409250  | 92409305  | FBLN5 |
| chr14 | 92413556  | 92414046  | FBLN5 |
| chr17 | 79495416  | 79496384  | FSCN2 |
| chr17 | 79503171  | 79503293  | FSCN2 |
| chr17 | 79503575  | 79503815  | FSCN2 |
| chr17 | 79503900  | 79504155  | FSCN2 |
| chr11 | 86656720  | 86663512  | FZD4  |
| chr11 | 86665842  | 86666433  | FZD4  |
| chr3  | 50229042  | 50229264  | GNAT1 |
| chr3  | 50230565  | 50230608  | GNAT1 |
| chr3  | 50230697  | 50230839  | GNAT1 |
| chr3  | 50230938  | 50231096  | GNAT1 |
| chr3  | 50231185  | 50231314  | GNAT1 |
| chr3  | 50231524  | 50231654  | GNAT1 |
| chr3  | 50231933  | 50232087  | GNAT1 |
| chr3  | 50232197  | 50232389  | GNAT1 |
| chr3  | 50232700  | 50235129  | GNAT1 |
| chr1  | 110145888 | 110146166 | GNAT2 |
| chr1  | 110146572 | 110146726 | GNAT2 |
| chr1  | 110148591 | 110148721 | GNAT2 |
| chr1  | 110148929 | 110149058 | GNAT2 |
| chr1  | 110151252 | 110151410 | GNAT2 |
| chr1  | 110152661 | 110152803 | GNAT2 |
| chr1  | 110153086 | 110153129 | GNAT2 |
| chr1  | 110155374 | 110155705 | GNAT2 |
| chr5  | 89854616  | 89854734  | GPR98 |
| chr5  | 89910651  | 89910836  | GPR98 |
| chr5  | 89913620  | 89913770  | GPR98 |
| chr5  | 89914902  | 89914998  | GPR98 |
| chr5  | 89918413  | 89918518  | GPR98 |
| chr5  | 89920946  | 89921060  | GPR98 |
| chr5  | 89923027  | 89923593  | GPR98 |
| chr5  | 89924378  | 89924649  | GPR98 |
| chr5  | 89925026  | 89925356  | GPR98 |
| chr5  | 89930930  | 89931107  | GPR98 |
| chr5  | 89933541  | 89933765  | GPR98 |
| chr5  | 89938452  | 89938579  | GPR98 |
| chr5  | 89938672  | 89938858  | GPR98 |
| chr5  | 89939619  | 89939800  | GPR98 |
| chr5  | 89940522  | 89940686  | GPR98 |
| chr5  | 89941784  | 89941908  | GPR98 |
| chr5  | 89943314  | 89943581  | GPR98 |
| chr5  | 89947420  | 89947547  | GPR98 |
| chr5  | 89948162  | 89948380  | GPR98 |

|      |          |          |       |
|------|----------|----------|-------|
| chr5 | 89949025 | 89949769 | GPR98 |
| chr5 | 89953721 | 89954095 | GPR98 |
| chr5 | 89968362 | 89968539 | GPR98 |
| chr5 | 89969870 | 89970051 | GPR98 |
| chr5 | 89971059 | 89971262 | GPR98 |
| chr5 | 89971896 | 89972026 | GPR98 |
| chr5 | 89975365 | 89975446 | GPR98 |
| chr5 | 89977131 | 89977271 | GPR98 |
| chr5 | 89979402 | 89980012 | GPR98 |
| chr5 | 89981596 | 89981812 | GPR98 |
| chr5 | 89985677 | 89985893 | GPR98 |
| chr5 | 89986613 | 89986858 | GPR98 |
| chr5 | 89988421 | 89988603 | GPR98 |
| chr5 | 89989706 | 89990518 | GPR98 |
| chr5 | 89992753 | 89992963 | GPR98 |
| chr5 | 89999481 | 89999612 | GPR98 |
| chr5 | 90000205 | 90000305 | GPR98 |
| chr5 | 90001216 | 90001396 | GPR98 |
| chr5 | 90002047 | 90002211 | GPR98 |
| chr5 | 90004632 | 90004726 | GPR98 |
| chr5 | 90006797 | 90006876 | GPR98 |
| chr5 | 90007000 | 90007139 | GPR98 |
| chr5 | 90008103 | 90008245 | GPR98 |
| chr5 | 90012283 | 90012546 | GPR98 |
| chr5 | 90015864 | 90016040 | GPR98 |
| chr5 | 90016751 | 90016876 | GPR98 |
| chr5 | 90020648 | 90020806 | GPR98 |
| chr5 | 90020902 | 90021049 | GPR98 |
| chr5 | 90021365 | 90021473 | GPR98 |
| chr5 | 90024485 | 90024750 | GPR98 |
| chr5 | 90025458 | 90025581 | GPR98 |
| chr5 | 90040862 | 90041082 | GPR98 |
| chr5 | 90041407 | 90041612 | GPR98 |
| chr5 | 90046367 | 90046514 | GPR98 |
| chr5 | 90049390 | 90049646 | GPR98 |
| chr5 | 90050799 | 90051002 | GPR98 |
| chr5 | 90052270 | 90052447 | GPR98 |
| chr5 | 90052795 | 90052978 | GPR98 |
| chr5 | 90055225 | 90055405 | GPR98 |
| chr5 | 90059121 | 90059286 | GPR98 |
| chr5 | 90070002 | 90070120 | GPR98 |
| chr5 | 90072269 | 90072393 | GPR98 |
| chr5 | 90073721 | 90073860 | GPR98 |
| chr5 | 90074243 | 90074426 | GPR98 |
| chr5 | 90074681 | 90074914 | GPR98 |
| chr5 | 90077246 | 90077395 | GPR98 |
| chr5 | 90078940 | 90079142 | GPR98 |



|       |           |           |        |
|-------|-----------|-----------|--------|
| chr5  | 90079654  | 90079874  | GPR98  |
| chr5  | 90083887  | 90084127  | GPR98  |
| chr5  | 90085518  | 90085668  | GPR98  |
| chr5  | 90086689  | 90087163  | GPR98  |
| chr5  | 90098555  | 90098699  | GPR98  |
| chr5  | 90101100  | 90101275  | GPR98  |
| chr5  | 90103418  | 90103554  | GPR98  |
| chr5  | 90106049  | 90107155  | GPR98  |
| chr5  | 90111435  | 90111553  | GPR98  |
| chr5  | 90119241  | 90119413  | GPR98  |
| chr5  | 90124760  | 90125003  | GPR98  |
| chr5  | 90136394  | 90136802  | GPR98  |
| chr5  | 90144453  | 90144638  | GPR98  |
| chr5  | 90149100  | 90149350  | GPR98  |
| chr5  | 90149878  | 90150018  | GPR98  |
| chr5  | 90151557  | 90151718  | GPR98  |
| chr5  | 90159573  | 90159674  | GPR98  |
| chr5  | 90261231  | 90261348  | GPR98  |
| chr5  | 90281160  | 90281339  | GPR98  |
| chr5  | 90368263  | 90368421  | GPR98  |
| chr5  | 90398035  | 90398157  | GPR98  |
| chr5  | 90445846  | 90446038  | GPR98  |
| chr5  | 90449037  | 90449215  | GPR98  |
| chr5  | 90459598  | 90460033  | GPR98  |
| chr13 | 114321596 | 114322400 | GRK1   |
| chr13 | 114324001 | 114324129 | GRK1   |
| chr13 | 114325813 | 114325972 | GRK1   |
| chr5  | 178405329 | 178408855 | GRM6   |
| chr5  | 178409910 | 178410222 | GRM6   |
| chr5  | 178413130 | 178413754 | GRM6   |
| chr5  | 178413838 | 178413984 | GRM6   |
| chr5  | 178415935 | 178416136 | GRM6   |
| chr5  | 178416265 | 178416406 | GRM6   |
| chr5  | 178417592 | 178417747 | GRM6   |
| chr5  | 178418424 | 178418560 | GRM6   |
| chr5  | 178418867 | 178419084 | GRM6   |
| chr5  | 178421441 | 178422124 | GRM6   |
| chr6  | 42123143  | 42123331  | GUCA1A |
| chr6  | 42130657  | 42130833  | GUCA1A |
| chr6  | 42141070  | 42141552  | GUCA1A |
| chr6  | 42146017  | 42146167  | GUCA1A |
| chr6  | 42146539  | 42146633  | GUCA1A |
| chr6  | 42146980  | 42147792  | GUCA1A |
| chr6  | 42151022  | 42152680  | GUCA1B |
| chr6  | 42153417  | 42153535  | GUCA1B |
| chr6  | 42156319  | 42156469  | GUCA1B |
| chr6  | 42162351  | 42162694  | GUCA1B |

|       |           |           |        |
|-------|-----------|-----------|--------|
| chr17 | 7905987   | 7906052   | GUCY2D |
| chr17 | 7906356   | 7907086   | GUCY2D |
| chr17 | 7907169   | 7907474   | GUCY2D |
| chr17 | 7909680   | 7910032   | GUCY2D |
| chr17 | 7910377   | 7910462   | GUCY2D |
| chr17 | 7910743   | 7910846   | GUCY2D |
| chr17 | 7911248   | 7911350   | GUCY2D |
| chr17 | 7912823   | 7912904   | GUCY2D |
| chr17 | 7915461   | 7915668   | GUCY2D |
| chr17 | 7915767   | 7915924   | GUCY2D |
| chr17 | 7916420   | 7916570   | GUCY2D |
| chr17 | 7917197   | 7917346   | GUCY2D |
| chr17 | 7917918   | 7918082   | GUCY2D |
| chr17 | 7918176   | 7918369   | GUCY2D |
| chr17 | 7918645   | 7918820   | GUCY2D |
| chr17 | 7919060   | 7919159   | GUCY2D |
| chr17 | 7919244   | 7919339   | GUCY2D |
| chr17 | 7919522   | 7919608   | GUCY2D |
| chr17 | 7919760   | 7919872   | GUCY2D |
| chr17 | 7923445   | 7923658   | GUCY2D |
| chr1  | 185703682 | 185704179 | HMCN1  |
| chr1  | 185815157 | 185815228 | HMCN1  |
| chr1  | 185833601 | 185833760 | HMCN1  |
| chr1  | 185834872 | 185834995 | HMCN1  |
| chr1  | 185878468 | 185878640 | HMCN1  |
| chr1  | 185880805 | 185880912 | HMCN1  |
| chr1  | 185891510 | 185891631 | HMCN1  |
| chr1  | 185892521 | 185892785 | HMCN1  |
| chr1  | 185894178 | 185894323 | HMCN1  |
| chr1  | 185897677 | 185897799 | HMCN1  |
| chr1  | 185902680 | 185902956 | HMCN1  |
| chr1  | 185931649 | 185931791 | HMCN1  |
| chr1  | 185932899 | 185933027 | HMCN1  |
| chr1  | 185934933 | 185935047 | HMCN1  |
| chr1  | 185939466 | 185939625 | HMCN1  |
| chr1  | 185946918 | 185947113 | HMCN1  |
| chr1  | 185950109 | 185950205 | HMCN1  |
| chr1  | 185951393 | 185951521 | HMCN1  |
| chr1  | 185953300 | 185953445 | HMCN1  |
| chr1  | 185956563 | 185956676 | HMCN1  |
| chr1  | 185958619 | 185958779 | HMCN1  |
| chr1  | 185959406 | 185959575 | HMCN1  |
| chr1  | 185962313 | 185962441 | HMCN1  |
| chr1  | 185963946 | 185964219 | HMCN1  |
| chr1  | 185966560 | 185966656 | HMCN1  |
| chr1  | 185969176 | 185969371 | HMCN1  |
| chr1  | 185970429 | 185970560 | HMCN1  |

|      |           |           |       |
|------|-----------|-----------|-------|
| chr1 | 185970725 | 185970873 | HMCN1 |
| chr1 | 185972849 | 185972976 | HMCN1 |
| chr1 | 185976259 | 185976414 | HMCN1 |
| chr1 | 185984290 | 185984569 | HMCN1 |
| chr1 | 185985089 | 185985371 | HMCN1 |
| chr1 | 185986094 | 185986203 | HMCN1 |
| chr1 | 185987314 | 185987484 | HMCN1 |
| chr1 | 185988672 | 185988827 | HMCN1 |
| chr1 | 185992161 | 185992285 | HMCN1 |
| chr1 | 186007065 | 186007167 | HMCN1 |
| chr1 | 186007960 | 186008137 | HMCN1 |
| chr1 | 186008859 | 186009011 | HMCN1 |
| chr1 | 186010144 | 186010268 | HMCN1 |
| chr1 | 186014819 | 186014995 | HMCN1 |
| chr1 | 186017874 | 186017971 | HMCN1 |
| chr1 | 186022083 | 186022206 | HMCN1 |
| chr1 | 186022956 | 186023118 | HMCN1 |
| chr1 | 186024524 | 186024806 | HMCN1 |
| chr1 | 186026365 | 186026533 | HMCN1 |
| chr1 | 186030982 | 186031096 | HMCN1 |
| chr1 | 186031645 | 186031732 | HMCN1 |
| chr1 | 186034369 | 186034561 | HMCN1 |
| chr1 | 186036965 | 186037139 | HMCN1 |
| chr1 | 186038794 | 186038908 | HMCN1 |
| chr1 | 186039743 | 186039889 | HMCN1 |
| chr1 | 186043872 | 186044023 | HMCN1 |
| chr1 | 186045559 | 186045754 | HMCN1 |
| chr1 | 186047238 | 186047352 | HMCN1 |
| chr1 | 186050338 | 186050526 | HMCN1 |
| chr1 | 186051996 | 186052093 | HMCN1 |
| chr1 | 186055377 | 186055539 | HMCN1 |
| chr1 | 186056348 | 186056462 | HMCN1 |
| chr1 | 186056574 | 186056777 | HMCN1 |
| chr1 | 186057063 | 186057145 | HMCN1 |
| chr1 | 186057276 | 186057408 | HMCN1 |
| chr1 | 186057737 | 186057887 | HMCN1 |
| chr1 | 186059889 | 186060049 | HMCN1 |
| chr1 | 186062265 | 186062390 | HMCN1 |
| chr1 | 186062617 | 186062801 | HMCN1 |
| chr1 | 186063407 | 186063505 | HMCN1 |
| chr1 | 186064374 | 186064653 | HMCN1 |
| chr1 | 186072603 | 186072800 | HMCN1 |
| chr1 | 186076015 | 186076097 | HMCN1 |
| chr1 | 186077592 | 186077729 | HMCN1 |
| chr1 | 186081943 | 186082085 | HMCN1 |
| chr1 | 186083110 | 186083255 | HMCN1 |
| chr1 | 186083950 | 186084078 | HMCN1 |

|       |           |           |       |
|-------|-----------|-----------|-------|
| chr1  | 186084389 | 186084546 | HMCN1 |
| chr1  | 186086125 | 186086247 | HMCN1 |
| chr1  | 186086590 | 186086755 | HMCN1 |
| chr1  | 186088322 | 186088430 | HMCN1 |
| chr1  | 186088876 | 186089014 | HMCN1 |
| chr1  | 186089142 | 186089277 | HMCN1 |
| chr1  | 186092082 | 186092352 | HMCN1 |
| chr1  | 186094735 | 186094926 | HMCN1 |
| chr1  | 186097209 | 186097423 | HMCN1 |
| chr1  | 186099097 | 186099232 | HMCN1 |
| chr1  | 186099638 | 186099829 | HMCN1 |
| chr1  | 186101459 | 186101541 | HMCN1 |
| chr1  | 186105799 | 186106069 | HMCN1 |
| chr1  | 186106629 | 186106800 | HMCN1 |
| chr1  | 186106933 | 186107104 | HMCN1 |
| chr1  | 186113304 | 186113475 | HMCN1 |
| chr1  | 186113664 | 186113835 | HMCN1 |
| chr1  | 186114534 | 186114705 | HMCN1 |
| chr1  | 186114884 | 186115055 | HMCN1 |
| chr1  | 186120331 | 186120481 | HMCN1 |
| chr1  | 186120737 | 186120875 | HMCN1 |
| chr1  | 186121881 | 186122003 | HMCN1 |
| chr1  | 186122881 | 186123119 | HMCN1 |
| chr1  | 186134242 | 186134305 | HMCN1 |
| chr1  | 186135315 | 186135435 | HMCN1 |
| chr1  | 186135939 | 186136074 | HMCN1 |
| chr1  | 186140468 | 186140582 | HMCN1 |
| chr1  | 186141137 | 186141263 | HMCN1 |
| chr1  | 186143645 | 186143774 | HMCN1 |
| chr1  | 186147547 | 186147898 | HMCN1 |
| chr1  | 186151299 | 186151419 | HMCN1 |
| chr1  | 186157014 | 186157141 | HMCN1 |
| chr1  | 186158643 | 186160085 | HMCN1 |
| chr10 | 124221040 | 124221640 | HTRA1 |
| chr10 | 124248417 | 124248517 | HTRA1 |
| chr10 | 124248937 | 124249142 | HTRA1 |
| chr10 | 124266206 | 124266401 | HTRA1 |
| chr10 | 124266885 | 124266918 | HTRA1 |
| chr10 | 124268171 | 124268286 | HTRA1 |
| chr10 | 124269611 | 124269669 | HTRA1 |
| chr10 | 124271485 | 124271581 | HTRA1 |
| chr10 | 124273706 | 124274424 | HTRA1 |
| chr20 | 2639040   | 2639483   | IDH3B |
| chr20 | 2640170   | 2640231   | IDH3B |
| chr20 | 2640344   | 2640439   | IDH3B |
| chr20 | 2640675   | 2640822   | IDH3B |
| chr20 | 2640908   | 2641011   | IDH3B |

|       |           |           |        |
|-------|-----------|-----------|--------|
| chr20 | 2641102   | 2641475   | IDH3B  |
| chr20 | 2641554   | 2641615   | IDH3B  |
| chr20 | 2644091   | 2644212   | IDH3B  |
| chr20 | 2644305   | 2644404   | IDH3B  |
| chr20 | 2644570   | 2644651   | IDH3B  |
| chr20 | 2644798   | 2644843   | IDH3B  |
| chr7  | 128032331 | 128033082 | IMPDH1 |
| chr7  | 128034331 | 128034415 | IMPDH1 |
| chr7  | 128034509 | 128034653 | IMPDH1 |
| chr7  | 128034942 | 128035087 | IMPDH1 |
| chr7  | 128035184 | 128035328 | IMPDH1 |
| chr7  | 128036653 | 128036749 | IMPDH1 |
| chr7  | 128036985 | 128037076 | IMPDH1 |
| chr7  | 128038467 | 128038667 | IMPDH1 |
| chr7  | 128040148 | 128040236 | IMPDH1 |
| chr7  | 128040386 | 128040593 | IMPDH1 |
| chr7  | 128040870 | 128040945 | IMPDH1 |
| chr7  | 128041068 | 128041170 | IMPDH1 |
| chr7  | 128043759 | 128043808 | IMPDH1 |
| chr7  | 128045820 | 128046024 | IMPDH1 |
| chr9  | 139323071 | 139324259 | INPP5E |
| chr9  | 139324728 | 139324865 | INPP5E |
| chr9  | 139325453 | 139325569 | INPP5E |
| chr9  | 139326275 | 139326437 | INPP5E |
| chr9  | 139326930 | 139327038 | INPP5E |
| chr9  | 139327407 | 139327527 | INPP5E |
| chr9  | 139327606 | 139327731 | INPP5E |
| chr9  | 139328488 | 139328586 | INPP5E |
| chr9  | 139329191 | 139329315 | INPP5E |
| chr9  | 139333059 | 139334256 | INPP5E |
| chr9  | 102861510 | 102861698 | INVS   |
| chr9  | 102866779 | 102866909 | INVS   |
| chr9  | 102888664 | 102888831 | INVS   |
| chr9  | 102988343 | 102988517 | INVS   |
| chr9  | 102991941 | 102992109 | INVS   |
| chr9  | 103002341 | 103002522 | INVS   |
| chr9  | 103004851 | 103004961 | INVS   |
| chr9  | 103008897 | 103009069 | INVS   |
| chr9  | 103014564 | 103014720 | INVS   |
| chr9  | 103015188 | 103015418 | INVS   |
| chr9  | 103027103 | 103027210 | INVS   |
| chr9  | 103035145 | 103035358 | INVS   |
| chr9  | 103046601 | 103046885 | INVS   |
| chr9  | 103054607 | 103055325 | INVS   |
| chr9  | 103059198 | 103059428 | INVS   |
| chr9  | 103060217 | 103060292 | INVS   |
| chr9  | 103062849 | 103063426 | INVS   |

|       |           |           |        |
|-------|-----------|-----------|--------|
| chr3  | 121488609 | 121489421 | IQCB1  |
| chr3  | 121491403 | 121491560 | IQCB1  |
| chr3  | 121500589 | 121500721 | IQCB1  |
| chr3  | 121507130 | 121507279 | IQCB1  |
| chr3  | 121508919 | 121509062 | IQCB1  |
| chr3  | 121526190 | 121526290 | IQCB1  |
| chr3  | 121527762 | 121527856 | IQCB1  |
| chr3  | 121544897 | 121545027 | IQCB1  |
| chr3  | 121547316 | 121547479 | IQCB1  |
| chr3  | 121547707 | 121547819 | IQCB1  |
| chr3  | 121553237 | 121553326 | IQCB1  |
| chr3  | 121553812 | 121553926 | IQCB1  |
| chr20 | 10618331  | 10620603  | JAG1   |
| chr20 | 10621430  | 10621581  | JAG1   |
| chr20 | 10621760  | 10621892  | JAG1   |
| chr20 | 10622107  | 10622341  | JAG1   |
| chr20 | 10622430  | 10622540  | JAG1   |
| chr20 | 10623135  | 10623249  | JAG1   |
| chr20 | 10624425  | 10624511  | JAG1   |
| chr20 | 10625004  | 10625032  | JAG1   |
| chr20 | 10625510  | 10625627  | JAG1   |
| chr20 | 10625790  | 10625904  | JAG1   |
| chr20 | 10626003  | 10626117  | JAG1   |
| chr20 | 10626618  | 10626732  | JAG1   |
| chr20 | 10627586  | 10627751  | JAG1   |
| chr20 | 10628607  | 10628758  | JAG1   |
| chr20 | 10629196  | 10629370  | JAG1   |
| chr20 | 10629708  | 10629755  | JAG1   |
| chr20 | 10630169  | 10630283  | JAG1   |
| chr20 | 10630894  | 10631008  | JAG1   |
| chr20 | 10632228  | 10632342  | JAG1   |
| chr20 | 10632778  | 10632898  | JAG1   |
| chr20 | 10633115  | 10633246  | JAG1   |
| chr20 | 10637045  | 10637106  | JAG1   |
| chr20 | 10639115  | 10639370  | JAG1   |
| chr20 | 10644610  | 10644662  | JAG1   |
| chr20 | 10653348  | 10653654  | JAG1   |
| chr20 | 10654097  | 10654694  | JAG1   |
| chr2  | 233630511 | 233633523 | KCNJ13 |
| chr2  | 233635612 | 233636088 | KCNJ13 |
| chr2  | 233641154 | 233641275 | KCNJ13 |
| chr9  | 2717525   | 2719095   | KCNV2  |
| chr9  | 2729445   | 2729757   | KCNV2  |
| chr7  | 23145916  | 23146413  | KLHL7  |
| chr7  | 23163395  | 23163498  | KLHL7  |
| chr7  | 23164306  | 23164400  | KLHL7  |
| chr7  | 23164666  | 23164791  | KLHL7  |

|       |           |           |       |
|-------|-----------|-----------|-------|
| chr7  | 23180387  | 23180563  | KLHL7 |
| chr7  | 23183469  | 23183644  | KLHL7 |
| chr7  | 23191685  | 23191828  | KLHL7 |
| chr7  | 23205316  | 23205557  | KLHL7 |
| chr7  | 23207454  | 23207656  | KLHL7 |
| chr7  | 23212566  | 23212664  | KLHL7 |
| chr7  | 23213633  | 23215036  | KLHL7 |
| chr6  | 80194708  | 80197583  | LCA5  |
| chr6  | 80198800  | 80198933  | LCA5  |
| chr6  | 80201304  | 80201447  | LCA5  |
| chr6  | 80202267  | 80202364  | LCA5  |
| chr6  | 80203329  | 80203467  | LCA5  |
| chr6  | 80222928  | 80223458  | LCA5  |
| chr6  | 80228421  | 80228802  | LCA5  |
| chr6  | 80234880  | 80234986  | LCA5  |
| chr6  | 80246832  | 80247147  | LCA5  |
| chr4  | 155665162 | 155665374 | LRAT  |
| chr4  | 155665477 | 155666018 | LRAT  |
| chr4  | 155670135 | 155674270 | LRAT  |
| chr11 | 68080107  | 68080273  | LRP5  |
| chr11 | 68115314  | 68115711  | LRP5  |
| chr11 | 68125117  | 68125315  | LRP5  |
| chr11 | 68131214  | 68131411  | LRP5  |
| chr11 | 68133038  | 68133170  | LRP5  |
| chr11 | 68153783  | 68154180  | LRP5  |
| chr11 | 68157348  | 68157520  | LRP5  |
| chr11 | 68170950  | 68171167  | LRP5  |
| chr11 | 68173991  | 68174281  | LRP5  |
| chr11 | 68177381  | 68177608  | LRP5  |
| chr11 | 68178903  | 68179088  | LRP5  |
| chr11 | 68181156  | 68181480  | LRP5  |
| chr11 | 68183795  | 68183995  | LRP5  |
| chr11 | 68190956  | 68191165  | LRP5  |
| chr11 | 68192569  | 68192760  | LRP5  |
| chr11 | 68193445  | 68193655  | LRP5  |
| chr11 | 68197042  | 68197168  | LRP5  |
| chr11 | 68201069  | 68201306  | LRP5  |
| chr11 | 68204356  | 68204467  | LRP5  |
| chr11 | 68205913  | 68206150  | LRP5  |
| chr11 | 68207244  | 68207384  | LRP5  |
| chr11 | 68213903  | 68214001  | LRP5  |
| chr11 | 68216276  | 68216743  | LRP5  |
| chr2  | 112656190 | 112656373 | MERTK |
| chr2  | 112686696 | 112687117 | MERTK |
| chr2  | 112702536 | 112702637 | MERTK |
| chr2  | 112704970 | 112705144 | MERTK |
| chr2  | 112722767 | 112722854 | MERTK |

|       |           |           |           |
|-------|-----------|-----------|-----------|
| chr2  | 112725713 | 112725829 | MERTK     |
| chr2  | 112732865 | 112733049 | MERTK     |
| chr2  | 112740418 | 112740570 | MERTK     |
| chr2  | 112751827 | 112751981 | MERTK     |
| chr2  | 112754899 | 112755053 | MERTK     |
| chr2  | 112758777 | 112758863 | MERTK     |
| chr2  | 112760668 | 112760764 | MERTK     |
| chr2  | 112761480 | 112761561 | MERTK     |
| chr2  | 112765959 | 112766052 | MERTK     |
| chr2  | 112767524 | 112767643 | MERTK     |
| chr2  | 112776989 | 112777099 | MERTK     |
| chr2  | 112778998 | 112779158 | MERTK     |
| chr2  | 112779834 | 112779971 | MERTK     |
| chr2  | 112785927 | 112786945 | MERTK     |
| chr11 | 119209651 | 119210558 | MFRP:C1Q1 |
| chr11 | 119210893 | 119211150 | MFRP:C1Q1 |
| chr11 | 119211404 | 119212482 | MFRP:C1Q1 |
| chr11 | 119212566 | 119212694 | MFRP:C1Q1 |
| chr11 | 119213305 | 119213437 | MFRP:C1Q1 |
| chr11 | 119213582 | 119213713 | MFRP:C1Q1 |
| chr11 | 119214525 | 119214674 | MFRP:C1Q1 |
| chr11 | 119215024 | 119215101 | MFRP:C1Q1 |
| chr11 | 119215341 | 119215467 | MFRP:C1Q1 |
| chr11 | 119215583 | 119215714 | MFRP:C1Q1 |
| chr11 | 119216129 | 119216343 | MFRP:C1Q1 |
| chr11 | 119216482 | 119216638 | MFRP:C1Q1 |
| chr11 | 119216755 | 119216869 | MFRP:C1Q1 |
| chr11 | 119216981 | 119217084 | MFRP:C1Q1 |
| chr11 | 119217169 | 119217383 | MFRP:C1Q1 |
| chr20 | 10385832  | 10386335  | MKKS      |
| chr20 | 10388263  | 10388374  | MKKS      |
| chr20 | 10389275  | 10389451  | MKKS      |
| chr20 | 10393177  | 10394579  | MKKS      |
| chr20 | 10401175  | 10401406  | MKKS      |
| chr20 | 10414755  | 10414866  | MKKS      |
| chr4  | 100485239 | 100485394 | MTTP      |
| chr4  | 100495965 | 100496127 | MTTP      |
| chr4  | 100503061 | 100503249 | MTTP      |
| chr4  | 100504530 | 100504674 | MTTP      |
| chr4  | 100510799 | 100510907 | MTTP      |
| chr4  | 100512391 | 100512508 | MTTP      |
| chr4  | 100512807 | 100512947 | MTTP      |
| chr4  | 100515889 | 100516040 | MTTP      |
| chr4  | 100518223 | 100518381 | MTTP      |
| chr4  | 100521721 | 100521890 | MTTP      |
| chr4  | 100522763 | 100522871 | MTTP      |
| chr4  | 100527904 | 100528117 | MTTP      |



|       |           |           |       |
|-------|-----------|-----------|-------|
| chr4  | 100529922 | 100530134 | MTTP  |
| chr4  | 100532299 | 100532397 | MTTP  |
| chr4  | 100532488 | 100532610 | MTTP  |
| chr4  | 100534069 | 100534297 | MTTP  |
| chr4  | 100540130 | 100540255 | MTTP  |
| chr4  | 100542217 | 100542388 | MTTP  |
| chr4  | 100543833 | 100545154 | MTTP  |
| chr11 | 76839309  | 76839535  | MYO7A |
| chr11 | 76841634  | 76841698  | MYO7A |
| chr11 | 76853754  | 76853868  | MYO7A |
| chr11 | 76858843  | 76858996  | MYO7A |
| chr11 | 76866952  | 76867137  | MYO7A |
| chr11 | 76867705  | 76867827  | MYO7A |
| chr11 | 76867907  | 76868050  | MYO7A |
| chr11 | 76868324  | 76868438  | MYO7A |
| chr11 | 76869322  | 76869476  | MYO7A |
| chr11 | 76870492  | 76870569  | MYO7A |
| chr11 | 76871208  | 76871328  | MYO7A |
| chr11 | 76872018  | 76872161  | MYO7A |
| chr11 | 76873165  | 76873376  | MYO7A |
| chr11 | 76873898  | 76874034  | MYO7A |
| chr11 | 76877101  | 76877208  | MYO7A |
| chr11 | 76883793  | 76883931  | MYO7A |
| chr11 | 76885801  | 76885960  | MYO7A |
| chr11 | 76886417  | 76886510  | MYO7A |
| chr11 | 76888594  | 76888689  | MYO7A |
| chr11 | 76890090  | 76890175  | MYO7A |
| chr11 | 76890780  | 76890999  | MYO7A |
| chr11 | 76891419  | 76891527  | MYO7A |
| chr11 | 76892425  | 76892635  | MYO7A |
| chr11 | 76892996  | 76893200  | MYO7A |
| chr11 | 76893468  | 76893645  | MYO7A |
| chr11 | 76894112  | 76894202  | MYO7A |
| chr11 | 76895632  | 76895760  | MYO7A |
| chr11 | 76900388  | 76900515  | MYO7A |
| chr11 | 76901064  | 76901184  | MYO7A |
| chr11 | 76901741  | 76901915  | MYO7A |
| chr11 | 76903095  | 76903323  | MYO7A |
| chr11 | 76905398  | 76905569  | MYO7A |
| chr11 | 76908525  | 76908643  | MYO7A |
| chr11 | 76909539  | 76909666  | MYO7A |
| chr11 | 76910579  | 76910863  | MYO7A |
| chr11 | 76912492  | 76912683  | MYO7A |
| chr11 | 76913344  | 76913469  | MYO7A |
| chr11 | 76914104  | 76914262  | MYO7A |
| chr11 | 76915120  | 76915274  | MYO7A |
| chr11 | 76916506  | 76916662  | MYO7A |

|       |           |           |       |
|-------|-----------|-----------|-------|
| chr11 | 76917141  | 76917247  | MYO7A |
| chr11 | 76918333  | 76918447  | MYO7A |
| chr11 | 76919474  | 76919562  | MYO7A |
| chr11 | 76919741  | 76919848  | MYO7A |
| chr11 | 76922196  | 76922382  | MYO7A |
| chr11 | 76922865  | 76922982  | MYO7A |
| chr11 | 76923996  | 76924080  | MYO7A |
| chr11 | 76924904  | 76925024  | MYO7A |
| chr11 | 76925651  | 76926286  | MYO7A |
| chrX  | 43808024  | 43809272  | NDP   |
| chrX  | 43817717  | 43818098  | NDP   |
| chrX  | 43832549  | 43832921  | NDP   |
| chr2  | 110880913 | 110881640 | NPHP1 |
| chr2  | 110883213 | 110883258 | NPHP1 |
| chr2  | 110886762 | 110886836 | NPHP1 |
| chr2  | 110889255 | 110889368 | NPHP1 |
| chr2  | 110901118 | 110901218 | NPHP1 |
| chr2  | 110902069 | 110902146 | NPHP1 |
| chr2  | 110904329 | 110904412 | NPHP1 |
| chr2  | 110905492 | 110905603 | NPHP1 |
| chr2  | 110907758 | 110907833 | NPHP1 |
| chr2  | 110917703 | 110917832 | NPHP1 |
| chr2  | 110919179 | 110919274 | NPHP1 |
| chr2  | 110920624 | 110920712 | NPHP1 |
| chr2  | 110922096 | 110922307 | NPHP1 |
| chr2  | 110922628 | 110922732 | NPHP1 |
| chr2  | 110926028 | 110926130 | NPHP1 |
| chr2  | 110927382 | 110927575 | NPHP1 |
| chr2  | 110935999 | 110936124 | NPHP1 |
| chr2  | 110937200 | 110937261 | NPHP1 |
| chr2  | 110958997 | 110959071 | NPHP1 |
| chr2  | 110962476 | 110962639 | NPHP1 |
| chr3  | 132399453 | 132400934 | NPHP3 |
| chr3  | 132401546 | 132401662 | NPHP3 |
| chr3  | 132402242 | 132402368 | NPHP3 |
| chr3  | 132403397 | 132403638 | NPHP3 |
| chr3  | 132405103 | 132405231 | NPHP3 |
| chr3  | 132405994 | 132406070 | NPHP3 |
| chr3  | 132407493 | 132407735 | NPHP3 |
| chr3  | 132407917 | 132408107 | NPHP3 |
| chr3  | 132409371 | 132409494 | NPHP3 |
| chr3  | 132410035 | 132410130 | NPHP3 |
| chr3  | 132411497 | 132411662 | NPHP3 |
| chr3  | 132413670 | 132413809 | NPHP3 |
| chr3  | 132415574 | 132415657 | NPHP3 |
| chr3  | 132416103 | 132416206 | NPHP3 |
| chr3  | 132418196 | 132418294 | NPHP3 |

|       |           |           |       |
|-------|-----------|-----------|-------|
| chr3  | 132418761 | 132418905 | NPHP3 |
| chr3  | 132419177 | 132419292 | NPHP3 |
| chr3  | 132420273 | 132420377 | NPHP3 |
| chr3  | 132423041 | 132423215 | NPHP3 |
| chr3  | 132424583 | 132424658 | NPHP3 |
| chr3  | 132426944 | 132427101 | NPHP3 |
| chr3  | 132431969 | 132432130 | NPHP3 |
| chr3  | 132433928 | 132434062 | NPHP3 |
| chr3  | 132435600 | 132435753 | NPHP3 |
| chr3  | 132437837 | 132437988 | NPHP3 |
| chr3  | 132438548 | 132438674 | NPHP3 |
| chr3  | 132440806 | 132441276 | NPHP3 |
| chr1  | 5922869   | 5923465   | NPHP4 |
| chr1  | 5923949   | 5924093   | NPHP4 |
| chr1  | 5924397   | 5924577   | NPHP4 |
| chr1  | 5925161   | 5925333   | NPHP4 |
| chr1  | 5926432   | 5926518   | NPHP4 |
| chr1  | 5927089   | 5927175   | NPHP4 |
| chr1  | 5927799   | 5927956   | NPHP4 |
| chr1  | 5933311   | 5933395   | NPHP4 |
| chr1  | 5934530   | 5934717   | NPHP4 |
| chr1  | 5934933   | 5935160   | NPHP4 |
| chr1  | 5937152   | 5937358   | NPHP4 |
| chr1  | 5940173   | 5940299   | NPHP4 |
| chr1  | 5947345   | 5947526   | NPHP4 |
| chr1  | 5950927   | 5951088   | NPHP4 |
| chr1  | 5964676   | 5964864   | NPHP4 |
| chr1  | 5965351   | 5965543   | NPHP4 |
| chr1  | 5965691   | 5965843   | NPHP4 |
| chr1  | 5967174   | 5967282   | NPHP4 |
| chr1  | 5969211   | 5969273   | NPHP4 |
| chr1  | 5987708   | 5987847   | NPHP4 |
| chr1  | 5993206   | 5993389   | NPHP4 |
| chr1  | 6007163   | 6007290   | NPHP4 |
| chr1  | 6008129   | 6008311   | NPHP4 |
| chr1  | 6012759   | 6012896   | NPHP4 |
| chr1  | 6021853   | 6022009   | NPHP4 |
| chr1  | 6027358   | 6027423   | NPHP4 |
| chr1  | 6029146   | 6029319   | NPHP4 |
| chr1  | 6038329   | 6038473   | NPHP4 |
| chr1  | 6046214   | 6046387   | NPHP4 |
| chr1  | 6052303   | 6052531   | NPHP4 |
| chr15 | 72102893  | 72103201  | NR2E3 |
| chr15 | 72103822  | 72103949  | NR2E3 |
| chr15 | 72104105  | 72104209  | NR2E3 |
| chr15 | 72104294  | 72104516  | NR2E3 |
| chr15 | 72104675  | 72104851  | NR2E3 |

|       |           |           |       |
|-------|-----------|-----------|-------|
| chr15 | 72105728  | 72105976  | NR2E3 |
| chr15 | 72106352  | 72107270  | NR2E3 |
| chr14 | 24549315  | 24550777  | NRL   |
| chr14 | 24551676  | 24552084  | NRL   |
| chr14 | 24553728  | 24553832  | NRL   |
| chrX  | 41306712  | 41307179  | NYX   |
| chrX  | 41332743  | 41334905  | NYX   |
| chr10 | 126085871 | 126086671 | OAT   |
| chr10 | 126089408 | 126089553 | OAT   |
| chr10 | 126090294 | 126090408 | OAT   |
| chr10 | 126091495 | 126091624 | OAT   |
| chr10 | 126092366 | 126092489 | OAT   |
| chr10 | 126094004 | 126094132 | OAT   |
| chr10 | 126097110 | 126097206 | OAT   |
| chr10 | 126097309 | 126097534 | OAT   |
| chr10 | 126100541 | 126100769 | OAT   |
| chr10 | 126107441 | 126107545 | OAT   |
| chrX  | 13752831  | 13753202  | OFD1  |
| chrX  | 13753366  | 13753465  | OFD1  |
| chrX  | 13754596  | 13754797  | OFD1  |
| chrX  | 13756964  | 13757033  | OFD1  |
| chrX  | 13757120  | 13757151  | OFD1  |
| chrX  | 13762533  | 13762638  | OFD1  |
| chrX  | 13764437  | 13764574  | OFD1  |
| chrX  | 13764898  | 13765072  | OFD1  |
| chrX  | 13767545  | 13767652  | OFD1  |
| chrX  | 13769367  | 13769487  | OFD1  |
| chrX  | 13771486  | 13771560  | OFD1  |
| chrX  | 13773269  | 13773361  | OFD1  |
| chrX  | 13774696  | 13774886  | OFD1  |
| chrX  | 13775778  | 13775909  | OFD1  |
| chrX  | 13776455  | 13776567  | OFD1  |
| chrX  | 13778233  | 13778839  | OFD1  |
| chrX  | 13779203  | 13779330  | OFD1  |
| chrX  | 13780462  | 13780563  | OFD1  |
| chrX  | 13781863  | 13781974  | OFD1  |
| chrX  | 13785245  | 13785403  | OFD1  |
| chrX  | 13786172  | 13786343  | OFD1  |
| chrX  | 13786836  | 13786904  | OFD1  |
| chrX  | 13787184  | 13787480  | OFD1  |
| chr3  | 193310932 | 193311198 | OPA1  |
| chr3  | 193332511 | 193332830 | OPA1  |
| chr3  | 193333462 | 193333559 | OPA1  |
| chr3  | 193336657 | 193336725 | OPA1  |
| chr3  | 193349400 | 193349454 | OPA1  |
| chr3  | 193353206 | 193353311 | OPA1  |
| chr3  | 193354983 | 193355070 | OPA1  |

|       |           |           |        |
|-------|-----------|-----------|--------|
| chr3  | 193355740 | 193355854 | OPA1   |
| chr3  | 193360553 | 193360634 | OPA1   |
| chr3  | 193360763 | 193360838 | OPA1   |
| chr3  | 193361161 | 193361233 | OPA1   |
| chr3  | 193361316 | 193361416 | OPA1   |
| chr3  | 193361763 | 193361894 | OPA1   |
| chr3  | 193363341 | 193363414 | OPA1   |
| chr3  | 193363516 | 193363589 | OPA1   |
| chr3  | 193364853 | 193364969 | OPA1   |
| chr3  | 193365858 | 193365923 | OPA1   |
| chr3  | 193366583 | 193366660 | OPA1   |
| chr3  | 193372650 | 193372816 | OPA1   |
| chr3  | 193374868 | 193375021 | OPA1   |
| chr3  | 193376675 | 193376784 | OPA1   |
| chr3  | 193377270 | 193377350 | OPA1   |
| chr3  | 193380610 | 193380751 | OPA1   |
| chr3  | 193382668 | 193382785 | OPA1   |
| chr3  | 193384084 | 193384178 | OPA1   |
| chr3  | 193384958 | 193385069 | OPA1   |
| chr3  | 193409851 | 193409921 | OPA1   |
| chr3  | 193412394 | 193415599 | OPA1   |
| chr19 | 46049540  | 46057169  | OPA3   |
| chr19 | 46087880  | 46088122  | OPA3   |
| chrX  | 153409724 | 153409869 | OPN1LW |
| chrX  | 153416127 | 153416424 | OPN1LW |
| chrX  | 153418412 | 153418581 | OPN1LW |
| chrX  | 153420048 | 153420214 | OPN1LW |
| chrX  | 153421768 | 153422008 | OPN1LW |
| chrX  | 153424290 | 153424507 | OPN1LW |
| chrX  | 153448084 | 153448278 | OPN1MW |
| chrX  | 153453258 | 153453555 | OPN1MW |
| chrX  | 153455542 | 153455711 | OPN1MW |
| chrX  | 153457178 | 153457344 | OPN1MW |
| chrX  | 153458898 | 153459138 | OPN1MW |
| chrX  | 153461420 | 153462351 | OPN1MW |
| chrX  | 153485202 | 153485396 | OPN1MW |
| chrX  | 153490376 | 153490673 | OPN1MW |
| chrX  | 153492660 | 153492829 | OPN1MW |
| chrX  | 153494296 | 153494462 | OPN1MW |
| chrX  | 153496016 | 153496256 | OPN1MW |
| chrX  | 153498538 | 153499469 | OPN1MW |
| chr7  | 128412542 | 128412713 | OPN1SW |
| chr7  | 128413702 | 128413942 | OPN1SW |
| chr7  | 128414551 | 128414717 | OPN1SW |
| chr7  | 128415039 | 128415208 | OPN1SW |
| chr7  | 128415492 | 128415844 | OPN1SW |
| chr14 | 57267424  | 57269073  | OTX2   |

|       |           |           |        |
|-------|-----------|-----------|--------|
| chr14 | 57270905  | 57271081  | OTX2   |
| chr14 | 57272077  | 57272293  | OTX2   |
| chr14 | 57276876  | 57276940  | OTX2   |
| chr14 | 57277093  | 57277184  | OTX2   |
| chr20 | 3869741   | 3870375   | PANK2  |
| chr20 | 3888572   | 3888925   | PANK2  |
| chr20 | 3891223   | 3891477   | PANK2  |
| chr20 | 3893104   | 3893281   | PANK2  |
| chr20 | 3897573   | 3897697   | PANK2  |
| chr20 | 3899317   | 3899443   | PANK2  |
| chr20 | 3903890   | 3904502   | PANK2  |
| chr10 | 102505467 | 102506060 | PAX2   |
| chr10 | 102509502 | 102509671 | PAX2   |
| chr10 | 102510450 | 102510648 | PAX2   |
| chr10 | 102539254 | 102539340 | PAX2   |
| chr10 | 102541002 | 102541122 | PAX2   |
| chr10 | 102546699 | 102546768 | PAX2   |
| chr10 | 102566186 | 102566362 | PAX2   |
| chr10 | 102568866 | 102568993 | PAX2   |
| chr10 | 102584404 | 102584506 | PAX2   |
| chr10 | 102586765 | 102586852 | PAX2   |
| chr10 | 102587299 | 102589698 | PAX2   |
| chr10 | 55568452  | 55569306  | PCDH15 |
| chr10 | 55570315  | 55570426  | PCDH15 |
| chr10 | 55587148  | 55587308  | PCDH15 |
| chr10 | 55588324  | 55588333  | PCDH15 |
| chr10 | 55591074  | 55591293  | PCDH15 |
| chr10 | 55600079  | 55600256  | PCDH15 |
| chr10 | 55616934  | 55617023  | PCDH15 |
| chr10 | 55626401  | 55626617  | PCDH15 |
| chr10 | 55663002  | 55663130  | PCDH15 |
| chr10 | 55698574  | 55698715  | PCDH15 |
| chr10 | 55700625  | 55700735  | PCDH15 |
| chr10 | 55719491  | 55719604  | PCDH15 |
| chr10 | 55721511  | 55721652  | PCDH15 |
| chr10 | 55755408  | 55755525  | PCDH15 |
| chr10 | 55779951  | 55780176  | PCDH15 |
| chr10 | 55782651  | 55782957  | PCDH15 |
| chr10 | 55826516  | 55826645  | PCDH15 |
| chr10 | 55839090  | 55839184  | PCDH15 |
| chr10 | 55849743  | 55849823  | PCDH15 |
| chr10 | 55892634  | 55892767  | PCDH15 |
| chr10 | 55912859  | 55913053  | PCDH15 |
| chr10 | 55943203  | 55943353  | PCDH15 |
| chr10 | 55944893  | 55945028  | PCDH15 |
| chr10 | 55949123  | 55949144  | PCDH15 |
| chr10 | 55955442  | 55955649  | PCDH15 |

|       |           |           |        |
|-------|-----------|-----------|--------|
| chr10 | 55973695  | 55973808  | PCDH15 |
| chr10 | 55996582  | 55996691  | PCDH15 |
| chr10 | 56077030  | 56077201  | PCDH15 |
| chr10 | 56089355  | 56089466  | PCDH15 |
| chr10 | 56106124  | 56106244  | PCDH15 |
| chr10 | 56128879  | 56129035  | PCDH15 |
| chr10 | 56138541  | 56138702  | PCDH15 |
| chr10 | 56287571  | 56287637  | PCDH15 |
| chr10 | 56288147  | 56288162  | PCDH15 |
| chr10 | 56423931  | 56424050  | PCDH15 |
| chr10 | 56560684  | 56561051  | PCDH15 |
| chr5  | 149237518 | 149240534 | PDE6A  |
| chr5  | 149242681 | 149242829 | PDE6A  |
| chr5  | 149245732 | 149245816 | PDE6A  |
| chr5  | 149247287 | 149247362 | PDE6A  |
| chr5  | 149247657 | 149247721 | PDE6A  |
| chr5  | 149262991 | 149263099 | PDE6A  |
| chr5  | 149264041 | 149264142 | PDE6A  |
| chr5  | 149264342 | 149264430 | PDE6A  |
| chr5  | 149265827 | 149265937 | PDE6A  |
| chr5  | 149274745 | 149274853 | PDE6A  |
| chr5  | 149275918 | 149276065 | PDE6A  |
| chr5  | 149276273 | 149276339 | PDE6A  |
| chr5  | 149277925 | 149278069 | PDE6A  |
| chr5  | 149278937 | 149279087 | PDE6A  |
| chr5  | 149283210 | 149283258 | PDE6A  |
| chr5  | 149286874 | 149286941 | PDE6A  |
| chr5  | 149294505 | 149294570 | PDE6A  |
| chr5  | 149301197 | 149301272 | PDE6A  |
| chr5  | 149310590 | 149310731 | PDE6A  |
| chr5  | 149313492 | 149313582 | PDE6A  |
| chr5  | 149314128 | 149314281 | PDE6A  |
| chr5  | 149323762 | 149324356 | PDE6A  |
| chr4  | 619362    | 619883    | PDE6B  |
| chr4  | 628465    | 628618    | PDE6B  |
| chr4  | 629668    | 629758    | PDE6B  |
| chr4  | 647640    | 647781    | PDE6B  |
| chr4  | 647868    | 647943    | PDE6B  |
| chr4  | 648612    | 648677    | PDE6B  |
| chr4  | 649728    | 649795    | PDE6B  |
| chr4  | 650033    | 650081    | PDE6B  |
| chr4  | 650662    | 650812    | PDE6B  |
| chr4  | 651139    | 651283    | PDE6B  |
| chr4  | 652740    | 652806    | PDE6B  |
| chr4  | 654255    | 654402    | PDE6B  |
| chr4  | 655922    | 656030    | PDE6B  |
| chr4  | 656297    | 656407    | PDE6B  |

|       |           |           |       |
|-------|-----------|-----------|-------|
| chr4  | 656888    | 656976    | PDE6B |
| chr4  | 657558    | 657659    | PDE6B |
| chr4  | 657902    | 658010    | PDE6B |
| chr4  | 658669    | 658733    | PDE6B |
| chr4  | 659043    | 659118    | PDE6B |
| chr4  | 660319    | 660403    | PDE6B |
| chr4  | 661644    | 661795    | PDE6B |
| chr4  | 663834    | 664680    | PDE6B |
| chr10 | 95372344  | 95372962  | PDE6C |
| chr10 | 95380388  | 95380541  | PDE6C |
| chr10 | 95380647  | 95380737  | PDE6C |
| chr10 | 95381688  | 95381829  | PDE6C |
| chr10 | 95385331  | 95385406  | PDE6C |
| chr10 | 95386396  | 95386461  | PDE6C |
| chr10 | 95386561  | 95386628  | PDE6C |
| chr10 | 95389014  | 95389062  | PDE6C |
| chr10 | 95394514  | 95394664  | PDE6C |
| chr10 | 95395253  | 95395397  | PDE6C |
| chr10 | 95396751  | 95396820  | PDE6C |
| chr10 | 95399826  | 95399973  | PDE6C |
| chr10 | 95400206  | 95400314  | PDE6C |
| chr10 | 95400676  | 95400786  | PDE6C |
| chr10 | 95405716  | 95405804  | PDE6C |
| chr10 | 95415516  | 95415617  | PDE6C |
| chr10 | 95418657  | 95418765  | PDE6C |
| chr10 | 95418860  | 95418924  | PDE6C |
| chr10 | 95421815  | 95421890  | PDE6C |
| chr10 | 95422316  | 95422400  | PDE6C |
| chr10 | 95422784  | 95422935  | PDE6C |
| chr10 | 95425116  | 95425429  | PDE6C |
| chr10 | 102777088 | 102777372 | PDZD7 |
| chr10 | 102777855 | 102778053 | PDZD7 |
| chr10 | 102778578 | 102778974 | PDZD7 |
| chr10 | 102780374 | 102780435 | PDZD7 |
| chr10 | 102781554 | 102781702 | PDZD7 |
| chr10 | 102781965 | 102782142 | PDZD7 |
| chr10 | 102783192 | 102783367 | PDZD7 |
| chr10 | 102783684 | 102783825 | PDZD7 |
| chr10 | 102789750 | 102790141 | PDZD7 |
| chr10 | 102790829 | 102790879 | PDZD7 |
| chr7  | 92116336  | 92116855  | PEX1  |
| chr7  | 92118606  | 92118737  | PEX1  |
| chr7  | 92119027  | 92119225  | PEX1  |
| chr7  | 92120585  | 92120816  | PEX1  |
| chr7  | 92122266  | 92122443  | PEX1  |
| chr7  | 92123606  | 92123710  | PEX1  |
| chr7  | 92123800  | 92123943  | PEX1  |



|       |           |           |      |
|-------|-----------|-----------|------|
| chr7  | 92126026  | 92126091  | PEX1 |
| chr7  | 92129017  | 92129152  | PEX1 |
| chr7  | 92130820  | 92130987  | PEX1 |
| chr7  | 92131203  | 92131393  | PEX1 |
| chr7  | 92132354  | 92132509  | PEX1 |
| chr7  | 92134045  | 92134216  | PEX1 |
| chr7  | 92135561  | 92135658  | PEX1 |
| chr7  | 92136307  | 92136440  | PEX1 |
| chr7  | 92138642  | 92138725  | PEX1 |
| chr7  | 92140257  | 92140361  | PEX1 |
| chr7  | 92140893  | 92141017  | PEX1 |
| chr7  | 92143161  | 92143281  | PEX1 |
| chr7  | 92146589  | 92147356  | PEX1 |
| chr7  | 92147454  | 92147569  | PEX1 |
| chr7  | 92148308  | 92148392  | PEX1 |
| chr7  | 92151415  | 92151559  | PEX1 |
| chr7  | 92157620  | 92157845  | PEX1 |
| chr8  | 77892495  | 77896431  | PEX2 |
| chr8  | 77912225  | 77912368  | PEX2 |
| chr8  | 77913118  | 77913280  | PEX2 |
| chr6  | 137143701 | 137143933 | PEX7 |
| chr6  | 137146351 | 137146409 | PEX7 |
| chr6  | 137147456 | 137147607 | PEX7 |
| chr6  | 137166752 | 137166830 | PEX7 |
| chr6  | 137167210 | 137167319 | PEX7 |
| chr6  | 137187764 | 137187871 | PEX7 |
| chr6  | 137191027 | 137191141 | PEX7 |
| chr6  | 137193335 | 137193391 | PEX7 |
| chr6  | 137219279 | 137219379 | PEX7 |
| chr6  | 137234595 | 137235071 | PEX7 |
| chrX  | 77359665  | 77359902  | PGK1 |
| chrX  | 77365363  | 77365414  | PGK1 |
| chrX  | 77369240  | 77369396  | PGK1 |
| chrX  | 77369512  | 77369657  | PGK1 |
| chrX  | 77372808  | 77372912  | PGK1 |
| chrX  | 77373547  | 77373667  | PGK1 |
| chrX  | 77378331  | 77378446  | PGK1 |
| chrX  | 77378691  | 77378871  | PGK1 |
| chrX  | 77380370  | 77380548  | PGK1 |
| chrX  | 77380823  | 77380922  | PGK1 |
| chrX  | 77381286  | 77382324  | PGK1 |
| chr10 | 13319795  | 13320354  | PHYH |
| chr10 | 13322975  | 13323110  | PHYH |
| chr10 | 13325689  | 13325839  | PHYH |
| chr10 | 13330359  | 13330541  | PHYH |
| chr10 | 13333830  | 13333912  | PHYH |
| chr10 | 13336427  | 13336596  | PHYH |

|       |          |          |         |
|-------|----------|----------|---------|
| chr10 | 13337495 | 13337606 | PHYH    |
| chr10 | 13340186 | 13340245 | PHYH    |
| chr10 | 13341967 | 13342130 | PHYH    |
| chr17 | 6354583  | 6358963  | PITPNM3 |
| chr17 | 6360913  | 6361042  | PITPNM3 |
| chr17 | 6364692  | 6364876  | PITPNM3 |
| chr17 | 6367051  | 6367201  | PITPNM3 |
| chr17 | 6367489  | 6367638  | PITPNM3 |
| chr17 | 6367974  | 6368091  | PITPNM3 |
| chr17 | 6371544  | 6371661  | PITPNM3 |
| chr17 | 6373579  | 6373728  | PITPNM3 |
| chr17 | 6374480  | 6374675  | PITPNM3 |
| chr17 | 6375976  | 6376147  | PITPNM3 |
| chr17 | 6377751  | 6377924  | PITPNM3 |
| chr17 | 6380348  | 6380533  | PITPNM3 |
| chr17 | 6381294  | 6381417  | PITPNM3 |
| chr17 | 6381866  | 6382056  | PITPNM3 |
| chr17 | 6386836  | 6387072  | PITPNM3 |
| chr17 | 6387535  | 6387612  | PITPNM3 |
| chr17 | 6406846  | 6406894  | PITPNM3 |
| chr17 | 6441306  | 6441402  | PITPNM3 |
| chr17 | 6459704  | 6459877  | PITPNM3 |
| chr17 | 74536120 | 74536297 | PRCD    |
| chr17 | 74536586 | 74536655 | PRCD    |
| chr17 | 74538634 | 74538715 | PRCD    |
| chr17 | 74539110 | 74539203 | PRCD    |
| chr17 | 74539884 | 74541458 | PRCD    |
| chr4  | 15969848 | 15970991 | PROM1   |
| chr4  | 15972665 | 15972705 | PROM1   |
| chr4  | 15981017 | 15981086 | PROM1   |
| chr4  | 15981503 | 15981527 | PROM1   |
| chr4  | 15982044 | 15982160 | PROM1   |
| chr4  | 15985885 | 15985978 | PROM1   |
| chr4  | 15987382 | 15987451 | PROM1   |
| chr4  | 15987579 | 15987660 | PROM1   |
| chr4  | 15989285 | 15989339 | PROM1   |
| chr4  | 15991354 | 15991447 | PROM1   |
| chr4  | 15992844 | 15992916 | PROM1   |
| chr4  | 15993870 | 15994014 | PROM1   |
| chr4  | 15995609 | 15995694 | PROM1   |
| chr4  | 16000007 | 16000111 | PROM1   |
| chr4  | 16002118 | 16002242 | PROM1   |
| chr4  | 16008160 | 16008313 | PROM1   |
| chr4  | 16010571 | 16010731 | PROM1   |
| chr4  | 16014897 | 16014961 | PROM1   |
| chr4  | 16017788 | 16017863 | PROM1   |
| chr4  | 16019945 | 16020163 | PROM1   |

|       |           |           |        |
|-------|-----------|-----------|--------|
| chr4  | 16024948  | 16025038  | PROM1  |
| chr4  | 16025917  | 16025981  | PROM1  |
| chr4  | 16026814  | 16026935  | PROM1  |
| chr4  | 16034926  | 16035132  | PROM1  |
| chr4  | 16037357  | 16037384  | PROM1  |
| chr4  | 16040568  | 16040624  | PROM1  |
| chr4  | 16077309  | 16077741  | PROM1  |
| chr1  | 150293927 | 150294041 | PRPF3  |
| chr1  | 150297352 | 150297545 | PRPF3  |
| chr1  | 150298208 | 150298339 | PRPF3  |
| chr1  | 150300778 | 150300925 | PRPF3  |
| chr1  | 150305154 | 150305238 | PRPF3  |
| chr1  | 150305449 | 150305670 | PRPF3  |
| chr1  | 150307405 | 150307712 | PRPF3  |
| chr1  | 150310635 | 150310802 | PRPF3  |
| chr1  | 150312873 | 150312953 | PRPF3  |
| chr1  | 150315784 | 150315928 | PRPF3  |
| chr1  | 150316637 | 150316737 | PRPF3  |
| chr1  | 150316909 | 150317023 | PRPF3  |
| chr1  | 150318493 | 150318612 | PRPF3  |
| chr1  | 150318883 | 150318967 | PRPF3  |
| chr1  | 150321632 | 150321694 | PRPF3  |
| chr1  | 150325308 | 150325704 | PRPF3  |
| chr19 | 54618789  | 54619177  | PRPF31 |
| chr19 | 54621650  | 54621835  | PRPF31 |
| chr19 | 54621952  | 54622013  | PRPF31 |
| chr19 | 54625238  | 54625322  | PRPF31 |
| chr19 | 54625875  | 54625973  | PRPF31 |
| chr19 | 54626832  | 54626939  | PRPF31 |
| chr19 | 54627127  | 54627297  | PRPF31 |
| chr19 | 54627877  | 54628035  | PRPF31 |
| chr19 | 54629902  | 54629992  | PRPF31 |
| chr19 | 54631447  | 54631575  | PRPF31 |
| chr19 | 54631679  | 54631752  | PRPF31 |
| chr19 | 54632431  | 54632560  | PRPF31 |
| chr19 | 54632646  | 54632745  | PRPF31 |
| chr19 | 54634737  | 54635150  | PRPF31 |
| chr17 | 1553922   | 1554250   | PRPF8  |
| chr17 | 1554401   | 1554604   | PRPF8  |
| chr17 | 1554707   | 1554847   | PRPF8  |
| chr17 | 1554941   | 1555082   | PRPF8  |
| chr17 | 1556835   | 1556977   | PRPF8  |
| chr17 | 1557070   | 1557310   | PRPF8  |
| chr17 | 1558643   | 1558837   | PRPF8  |
| chr17 | 1559685   | 1559859   | PRPF8  |
| chr17 | 1559941   | 1560055   | PRPF8  |
| chr17 | 1561546   | 1561675   | PRPF8  |

|       |          |          |       |
|-------|----------|----------|-------|
| chr17 | 1561819  | 1562057  | PRPF8 |
| chr17 | 1562650  | 1562842  | PRPF8 |
| chr17 | 1563134  | 1563295  | PRPF8 |
| chr17 | 1563725  | 1563872  | PRPF8 |
| chr17 | 1563991  | 1564121  | PRPF8 |
| chr17 | 1564286  | 1564456  | PRPF8 |
| chr17 | 1564564  | 1564700  | PRPF8 |
| chr17 | 1564904  | 1565084  | PRPF8 |
| chr17 | 1565199  | 1565447  | PRPF8 |
| chr17 | 1576374  | 1576491  | PRPF8 |
| chr17 | 1576650  | 1576861  | PRPF8 |
| chr17 | 1577039  | 1577186  | PRPF8 |
| chr17 | 1577735  | 1577974  | PRPF8 |
| chr17 | 1578445  | 1578633  | PRPF8 |
| chr17 | 1578913  | 1579106  | PRPF8 |
| chr17 | 1579221  | 1579348  | PRPF8 |
| chr17 | 1579500  | 1579664  | PRPF8 |
| chr17 | 1579798  | 1580005  | PRPF8 |
| chr17 | 1580269  | 1580466  | PRPF8 |
| chr17 | 1580858  | 1580988  | PRPF8 |
| chr17 | 1581811  | 1581946  | PRPF8 |
| chr17 | 1582055  | 1582175  | PRPF8 |
| chr17 | 1582310  | 1582500  | PRPF8 |
| chr17 | 1582584  | 1582704  | PRPF8 |
| chr17 | 1582902  | 1583093  | PRPF8 |
| chr17 | 1584019  | 1584125  | PRPF8 |
| chr17 | 1584222  | 1584348  | PRPF8 |
| chr17 | 1584771  | 1584984  | PRPF8 |
| chr17 | 1585113  | 1585332  | PRPF8 |
| chr17 | 1585422  | 1585587  | PRPF8 |
| chr17 | 1586826  | 1586995  | PRPF8 |
| chr17 | 1587765  | 1587876  | PRPF8 |
| chr17 | 1588073  | 1588176  | PRPF8 |
| chr6  | 42664332 | 42666245 | PRPH2 |
| chr6  | 42672102 | 42672349 | PRPH2 |
| chr6  | 42689491 | 42690358 | PRPH2 |
| chr19 | 3769088  | 3770957  | RAX2  |
| chr19 | 3771524  | 3771749  | RAX2  |
| chr19 | 3772160  | 3772219  | RAX2  |
| chr13 | 48877882 | 48878185 | RB1   |
| chr13 | 48881415 | 48881542 | RB1   |
| chr13 | 48916734 | 48916850 | RB1   |
| chr13 | 48919215 | 48919335 | RB1   |
| chr13 | 48921960 | 48921999 | RB1   |
| chr13 | 48923091 | 48923159 | RB1   |
| chr13 | 48934152 | 48934263 | RB1   |
| chr13 | 48936950 | 48937093 | RB1   |

|       |           |           |       |
|-------|-----------|-----------|-------|
| chr13 | 48939029  | 48939107  | RB1   |
| chr13 | 48941629  | 48941739  | RB1   |
| chr13 | 48942662  | 48942740  | RB1   |
| chr13 | 48947540  | 48947628  | RB1   |
| chr13 | 48951053  | 48951170  | RB1   |
| chr13 | 48953729  | 48953786  | RB1   |
| chr13 | 48954188  | 48954220  | RB1   |
| chr13 | 48954300  | 48954377  | RB1   |
| chr13 | 48955382  | 48955579  | RB1   |
| chr13 | 49027128  | 49027247  | RB1   |
| chr13 | 49030339  | 49030485  | RB1   |
| chr13 | 49033823  | 49033969  | RB1   |
| chr13 | 49037866  | 49037971  | RB1   |
| chr13 | 49039133  | 49039247  | RB1   |
| chr13 | 49039340  | 49039504  | RB1   |
| chr13 | 49047495  | 49047526  | RB1   |
| chr13 | 49050836  | 49050979  | RB1   |
| chr13 | 49051490  | 49051540  | RB1   |
| chr13 | 49054133  | 49056026  | RB1   |
| chr10 | 48381486  | 48382260  | RBP3  |
| chr10 | 48383843  | 48383986  | RBP3  |
| chr10 | 48385846  | 48386037  | RBP3  |
| chr10 | 48387823  | 48390991  | RBP3  |
| chr10 | 95351592  | 95351869  | RBP4  |
| chr10 | 95353579  | 95353792  | RBP4  |
| chr10 | 95360149  | 95360256  | RBP4  |
| chr10 | 95360423  | 95360560  | RBP4  |
| chr10 | 95360674  | 95360803  | RBP4  |
| chr10 | 95360927  | 95360993  | RBP4  |
| chr1  | 211649863 | 211652669 | RD3   |
| chr1  | 211654461 | 211654771 | RD3   |
| chr1  | 211665109 | 211666259 | RD3   |
| chr14 | 68168602  | 68168652  | RDH12 |
| chr14 | 68187564  | 68187619  | RDH12 |
| chr14 | 68189140  | 68189427  | RDH12 |
| chr14 | 68191189  | 68191308  | RDH12 |
| chr14 | 68191815  | 68191971  | RDH12 |
| chr14 | 68192767  | 68192872  | RDH12 |
| chr14 | 68193697  | 68193907  | RDH12 |
| chr14 | 68195907  | 68196097  | RDH12 |
| chr14 | 68200462  | 68201168  | RDH12 |
| chr12 | 56114150  | 56114301  | RDH5  |
| chr12 | 56114936  | 56115278  | RDH5  |
| chr12 | 56115472  | 56115731  | RDH5  |
| chr12 | 56117669  | 56117833  | RDH5  |
| chr12 | 56118105  | 56118525  | RDH5  |
| chr10 | 86004808  | 86004925  | RGR   |

|       |           |           |        |
|-------|-----------|-----------|--------|
| chr10 | 86007346  | 86007503  | RGR    |
| chr10 | 86008665  | 86008799  | RGR    |
| chr10 | 86012612  | 86012766  | RGR    |
| chr10 | 86014081  | 86014199  | RGR    |
| chr10 | 86017648  | 86017762  | RGR    |
| chr10 | 86018263  | 86018944  | RGR    |
| chr17 | 63133455  | 63133715  | RGS9   |
| chr17 | 63149539  | 63149636  | RGS9   |
| chr17 | 63154412  | 63154463  | RGS9   |
| chr17 | 63156350  | 63156457  | RGS9   |
| chr17 | 63156653  | 63156705  | RGS9   |
| chr17 | 63156968  | 63157027  | RGS9   |
| chr17 | 63159130  | 63159207  | RGS9   |
| chr17 | 63164317  | 63164399  | RGS9   |
| chr17 | 63173849  | 63173921  | RGS9   |
| chr17 | 63185403  | 63185433  | RGS9   |
| chr17 | 63186292  | 63186354  | RGS9   |
| chr17 | 63189660  | 63189774  | RGS9   |
| chr17 | 63193243  | 63193359  | RGS9   |
| chr17 | 63198110  | 63198198  | RGS9   |
| chr17 | 63200280  | 63200419  | RGS9   |
| chr17 | 63204039  | 63204125  | RGS9   |
| chr17 | 63206605  | 63206723  | RGS9   |
| chr17 | 63221119  | 63221604  | RGS9   |
| chr17 | 63223392  | 63223819  | RGS9   |
| chr19 | 33166312  | 33169206  | RGS9BP |
| chr3  | 129247481 | 129247937 | RHO    |
| chr3  | 129249718 | 129249887 | RHO    |
| chr3  | 129251093 | 129251259 | RHO    |
| chr3  | 129251375 | 129251615 | RHO    |
| chr3  | 129252450 | 129254187 | RHO    |
| chr6  | 72596649  | 72596890  | RIMS1  |
| chr6  | 72678685  | 72678766  | RIMS1  |
| chr6  | 72806651  | 72806865  | RIMS1  |
| chr6  | 72809677  | 72809689  | RIMS1  |
| chr6  | 72889277  | 72889618  | RIMS1  |
| chr6  | 72891986  | 72892852  | RIMS1  |
| chr6  | 72943475  | 72943543  | RIMS1  |
| chr6  | 72945320  | 72945431  | RIMS1  |
| chr6  | 72947525  | 72947625  | RIMS1  |
| chr6  | 72952016  | 72952140  | RIMS1  |
| chr6  | 72955517  | 72955564  | RIMS1  |
| chr6  | 72957717  | 72957830  | RIMS1  |
| chr6  | 72960032  | 72960163  | RIMS1  |
| chr6  | 72960623  | 72960795  | RIMS1  |
| chr6  | 72960917  | 72961071  | RIMS1  |
| chr6  | 72962463  | 72962535  | RIMS1  |

|       |          |          |       |
|-------|----------|----------|-------|
| chr6  | 72967827 | 72967984 | RIMS1 |
| chr6  | 72968688 | 72968814 | RIMS1 |
| chr6  | 72970407 | 72970470 | RIMS1 |
| chr6  | 72974677 | 72974755 | RIMS1 |
| chr6  | 72975092 | 72975206 | RIMS1 |
| chr6  | 72975662 | 72975752 | RIMS1 |
| chr6  | 72984051 | 72984135 | RIMS1 |
| chr6  | 72993749 | 72993821 | RIMS1 |
| chr6  | 73000381 | 73000564 | RIMS1 |
| chr6  | 73001636 | 73001749 | RIMS1 |
| chr6  | 73016960 | 73017073 | RIMS1 |
| chr6  | 73023208 | 73023375 | RIMS1 |
| chr6  | 73043302 | 73043538 | RIMS1 |
| chr6  | 73100299 | 73100438 | RIMS1 |
| chr6  | 73102399 | 73102512 | RIMS1 |
| chr6  | 73107950 | 73108052 | RIMS1 |
| chr6  | 73108656 | 73108796 | RIMS1 |
| chr6  | 73110197 | 73112845 | RIMS1 |
| chr15 | 89753097 | 89753674 | RLBP1 |
| chr15 | 89753929 | 89754040 | RLBP1 |
| chr15 | 89754973 | 89755132 | RLBP1 |
| chr15 | 89758290 | 89758469 | RLBP1 |
| chr15 | 89760350 | 89760555 | RLBP1 |
| chr15 | 89761795 | 89761924 | RLBP1 |
| chr15 | 89762194 | 89762306 | RLBP1 |
| chr15 | 89762967 | 89763090 | RLBP1 |
| chr15 | 89764765 | 89764922 | RLBP1 |
| chr11 | 62380212 | 62381343 | ROM1  |
| chr11 | 62381729 | 62381976 | ROM1  |
| chr11 | 62382092 | 62382590 | ROM1  |
| chr8  | 55528626 | 55528762 | RP1   |
| chr8  | 55533514 | 55534141 | RP1   |
| chr8  | 55534676 | 55534848 | RP1   |
| chr8  | 55537229 | 55543394 | RP1   |
| chrX  | 46696346 | 46696637 | RP2   |
| chrX  | 46712910 | 46713576 | RP2   |
| chrX  | 46719422 | 46719537 | RP2   |
| chrX  | 46736939 | 46737025 | RP2   |
| chrX  | 46739120 | 46741791 | RP2   |
| chr7  | 33134409 | 33135044 | RP9   |
| chr7  | 33136104 | 33136166 | RP9   |
| chr7  | 33136882 | 33136974 | RP9   |
| chr7  | 33138918 | 33139048 | RP9   |
| chr7  | 33140142 | 33140173 | RP9   |
| chr7  | 33148832 | 33149002 | RP9   |
| chr1  | 68894506 | 68895610 | RPE65 |
| chr1  | 68896747 | 68896859 | RPE65 |

|       |          |          |         |
|-------|----------|----------|---------|
| chr1  | 68896964 | 68897059 | RPE65   |
| chr1  | 68897153 | 68897268 | RPE65   |
| chr1  | 68903869 | 68903999 | RPE65   |
| chr1  | 68904624 | 68904764 | RPE65   |
| chr1  | 68904873 | 68905006 | RPE65   |
| chr1  | 68905243 | 68905325 | RPE65   |
| chr1  | 68906535 | 68906683 | RPE65   |
| chr1  | 68910213 | 68910355 | RPE65   |
| chr1  | 68910458 | 68910566 | RPE65   |
| chr1  | 68912392 | 68912543 | RPE65   |
| chr1  | 68914306 | 68914389 | RPE65   |
| chr1  | 68915577 | 68915642 | RPE65   |
| chrX  | 38143701 | 38146498 | RPGR    |
| chrX  | 38147113 | 38147294 | RPGR    |
| chrX  | 38150211 | 38150277 | RPGR    |
| chrX  | 38150645 | 38150737 | RPGR    |
| chrX  | 38156536 | 38156705 | RPGR    |
| chrX  | 38158208 | 38158394 | RPGR    |
| chrX  | 38160499 | 38160624 | RPGR    |
| chrX  | 38163887 | 38164043 | RPGR    |
| chrX  | 38169867 | 38170026 | RPGR    |
| chrX  | 38176568 | 38176718 | RPGR    |
| chrX  | 38178081 | 38178240 | RPGR    |
| chrX  | 38180279 | 38180342 | RPGR    |
| chrX  | 38182105 | 38182198 | RPGR    |
| chrX  | 38182651 | 38182777 | RPGR    |
| chrX  | 38186592 | 38186788 | RPGR    |
| chr14 | 21756135 | 21756220 | RPGRIP1 |
| chr14 | 21762835 | 21762968 | RPGRIP1 |
| chr14 | 21769124 | 21769396 | RPGRIP1 |
| chr14 | 21770646 | 21770743 | RPGRIP1 |
| chr14 | 21771489 | 21771702 | RPGRIP1 |
| chr14 | 21775889 | 21775995 | RPGRIP1 |
| chr14 | 21778742 | 21778766 | RPGRIP1 |
| chr14 | 21779982 | 21780129 | RPGRIP1 |
| chr14 | 21780591 | 21780665 | RPGRIP1 |
| chr14 | 21785854 | 21786009 | RPGRIP1 |
| chr14 | 21788175 | 21788336 | RPGRIP1 |
| chr14 | 21789417 | 21789561 | RPGRIP1 |
| chr14 | 21790012 | 21790163 | RPGRIP1 |
| chr14 | 21792776 | 21793229 | RPGRIP1 |
| chr14 | 21793390 | 21793542 | RPGRIP1 |
| chr14 | 21793989 | 21794332 | RPGRIP1 |
| chr14 | 21795781 | 21795966 | RPGRIP1 |
| chr14 | 21796582 | 21796786 | RPGRIP1 |
| chr14 | 21798407 | 21798546 | RPGRIP1 |
| chr14 | 21802763 | 21802864 | RPGRIP1 |



|       |           |           |          |
|-------|-----------|-----------|----------|
| chr14 | 21811194  | 21811387  | RPGRIP1  |
| chr14 | 21813271  | 21813356  | RPGRIP1  |
| chr14 | 21816330  | 21816461  | RPGRIP1  |
| chr14 | 21819262  | 21819460  | RPGRIP1  |
| chr16 | 53633817  | 53636100  | RPGRIP1L |
| chr16 | 53639392  | 53639526  | RPGRIP1L |
| chr16 | 53644878  | 53644963  | RPGRIP1L |
| chr16 | 53652936  | 53653120  | RPGRIP1L |
| chr16 | 53656130  | 53656268  | RPGRIP1L |
| chr16 | 53670350  | 53670424  | RPGRIP1L |
| chr16 | 53671606  | 53671766  | RPGRIP1L |
| chr16 | 53672221  | 53672323  | RPGRIP1L |
| chr16 | 53674944  | 53675028  | RPGRIP1L |
| chr16 | 53675196  | 53675387  | RPGRIP1L |
| chr16 | 53679536  | 53679915  | RPGRIP1L |
| chr16 | 53682875  | 53683027  | RPGRIP1L |
| chr16 | 53686446  | 53686899  | RPGRIP1L |
| chr16 | 53690383  | 53690501  | RPGRIP1L |
| chr16 | 53691364  | 53691544  | RPGRIP1L |
| chr16 | 53692325  | 53692376  | RPGRIP1L |
| chr16 | 53692683  | 53692790  | RPGRIP1L |
| chr16 | 53698781  | 53698921  | RPGRIP1L |
| chr16 | 53705421  | 53705495  | RPGRIP1L |
| chr16 | 53706781  | 53706928  | RPGRIP1L |
| chr16 | 53708928  | 53709034  | RPGRIP1L |
| chr16 | 53720344  | 53720488  | RPGRIP1L |
| chr16 | 53721774  | 53721877  | RPGRIP1L |
| chr16 | 53725977  | 53726276  | RPGRIP1L |
| chr16 | 53730062  | 53730207  | RPGRIP1L |
| chr16 | 53734550  | 53734642  | RPGRIP1L |
| chr16 | 53737714  | 53737771  | RPGRIP1L |
| chrX  | 18657809  | 18660276  | RS1      |
| chrX  | 18662549  | 18662745  | RS1      |
| chrX  | 18665310  | 18665452  | RS1      |
| chrX  | 18674772  | 18674878  | RS1      |
| chrX  | 18675759  | 18675785  | RS1      |
| chrX  | 18690136  | 18690223  | RS1      |
| chr2  | 234216308 | 234216668 | SAG      |
| chr2  | 234217807 | 234217910 | SAG      |
| chr2  | 234224720 | 234224781 | SAG      |
| chr2  | 234227396 | 234227441 | SAG      |
| chr2  | 234229275 | 234229469 | SAG      |
| chr2  | 234231591 | 234231651 | SAG      |
| chr2  | 234235766 | 234235843 | SAG      |
| chr2  | 234237123 | 234237259 | SAG      |
| chr2  | 234238138 | 234238223 | SAG      |
| chr2  | 234240285 | 234240358 | SAG      |

|      |           |           |          |
|------|-----------|-----------|----------|
| chr2 | 234243607 | 234243745 | SAG      |
| chr2 | 234247321 | 234247399 | SAG      |
| chr2 | 234249100 | 234249124 | SAG      |
| chr2 | 234250916 | 234250972 | SAG      |
| chr2 | 234255048 | 234255058 | SAG      |
| chr2 | 234255452 | 234255701 | SAG      |
| chr1 | 156123321 | 156123555 | SEMA4A   |
| chr1 | 156124340 | 156124508 | SEMA4A   |
| chr1 | 156126204 | 156126365 | SEMA4A   |
| chr1 | 156127860 | 156127923 | SEMA4A   |
| chr1 | 156128178 | 156128277 | SEMA4A   |
| chr1 | 156128509 | 156128615 | SEMA4A   |
| chr1 | 156130233 | 156130350 | SEMA4A   |
| chr1 | 156130695 | 156130820 | SEMA4A   |
| chr1 | 156131136 | 156131309 | SEMA4A   |
| chr1 | 156132734 | 156132885 | SEMA4A   |
| chr1 | 156142616 | 156142797 | SEMA4A   |
| chr1 | 156144612 | 156144731 | SEMA4A   |
| chr1 | 156144876 | 156145034 | SEMA4A   |
| chr1 | 156145346 | 156145447 | SEMA4A   |
| chr1 | 156146195 | 156147541 | SEMA4A   |
| chr2 | 96940074  | 96940893  | SNRNP200 |
| chr2 | 96940994  | 96941087  | SNRNP200 |
| chr2 | 96942641  | 96942723  | SNRNP200 |
| chr2 | 96942818  | 96942979  | SNRNP200 |
| chr2 | 96943276  | 96943453  | SNRNP200 |
| chr2 | 96943544  | 96943688  | SNRNP200 |
| chr2 | 96943974  | 96944096  | SNRNP200 |
| chr2 | 96944284  | 96944449  | SNRNP200 |
| chr2 | 96944546  | 96944736  | SNRNP200 |
| chr2 | 96945188  | 96945297  | SNRNP200 |
| chr2 | 96947551  | 96947660  | SNRNP200 |
| chr2 | 96948938  | 96949090  | SNRNP200 |
| chr2 | 96949272  | 96949451  | SNRNP200 |
| chr2 | 96949550  | 96949742  | SNRNP200 |
| chr2 | 96950095  | 96950323  | SNRNP200 |
| chr2 | 96950917  | 96951078  | SNRNP200 |
| chr2 | 96952048  | 96952222  | SNRNP200 |
| chr2 | 96952425  | 96952615  | SNRNP200 |
| chr2 | 96952743  | 96952898  | SNRNP200 |
| chr2 | 96953176  | 96953295  | SNRNP200 |
| chr2 | 96953600  | 96953707  | SNRNP200 |
| chr2 | 96954400  | 96954484  | SNRNP200 |
| chr2 | 96954774  | 96954855  | SNRNP200 |
| chr2 | 96954964  | 96955117  | SNRNP200 |
| chr2 | 96955536  | 96955734  | SNRNP200 |
| chr2 | 96956063  | 96956252  | SNRNP200 |

|       |           |           |          |
|-------|-----------|-----------|----------|
| chr2  | 96956421  | 96956553  | SNRNP200 |
| chr2  | 96957129  | 96957240  | SNRNP200 |
| chr2  | 96957488  | 96957638  | SNRNP200 |
| chr2  | 96958709  | 96958833  | SNRNP200 |
| chr2  | 96959053  | 96959247  | SNRNP200 |
| chr2  | 96961225  | 96961396  | SNRNP200 |
| chr2  | 96962273  | 96962429  | SNRNP200 |
| chr2  | 96962670  | 96962808  | SNRNP200 |
| chr2  | 96963100  | 96963274  | SNRNP200 |
| chr2  | 96963374  | 96963458  | SNRNP200 |
| chr2  | 96964021  | 96964158  | SNRNP200 |
| chr2  | 96964340  | 96964440  | SNRNP200 |
| chr2  | 96964552  | 96964705  | SNRNP200 |
| chr2  | 96965066  | 96965165  | SNRNP200 |
| chr2  | 96966735  | 96966791  | SNRNP200 |
| chr2  | 96967261  | 96967454  | SNRNP200 |
| chr2  | 96968896  | 96969068  | SNRNP200 |
| chr2  | 96970442  | 96970606  | SNRNP200 |
| chr2  | 96971130  | 96971297  | SNRNP200 |
| chr14 | 88851987  | 88852181  | SPATA7   |
| chr14 | 88857724  | 88857799  | SPATA7   |
| chr14 | 88859736  | 88859832  | SPATA7   |
| chr14 | 88862499  | 88862547  | SPATA7   |
| chr14 | 88883054  | 88883188  | SPATA7   |
| chr14 | 88892575  | 88893048  | SPATA7   |
| chr14 | 88893973  | 88894040  | SPATA7   |
| chr14 | 88895691  | 88895807  | SPATA7   |
| chr14 | 88897515  | 88897569  | SPATA7   |
| chr14 | 88899478  | 88899556  | SPATA7   |
| chr14 | 88903886  | 88903941  | SPATA7   |
| chr14 | 88904181  | 88904802  | SPATA7   |
| chr11 | 12695968  | 12696381  | TEAD1    |
| chr11 | 12696955  | 12697108  | TEAD1    |
| chr11 | 12785725  | 12785981  | TEAD1    |
| chr11 | 12883796  | 12883861  | TEAD1    |
| chr11 | 12886384  | 12886447  | TEAD1    |
| chr11 | 12901254  | 12901389  | TEAD1    |
| chr11 | 12902551  | 12902598  | TEAD1    |
| chr11 | 12903442  | 12903504  | TEAD1    |
| chr11 | 12904547  | 12904672  | TEAD1    |
| chr11 | 12923486  | 12923660  | TEAD1    |
| chr11 | 12946458  | 12946599  | TEAD1    |
| chr11 | 12951720  | 12951873  | TEAD1    |
| chr11 | 12958655  | 12966283  | TEAD1    |
| chrX  | 100603026 | 100603389 | TIMM8A   |
| chrX  | 100603520 | 100603708 | TIMM8A   |
| chr22 | 33196801  | 33198108  | TIMP3    |

|       |           |           |          |
|-------|-----------|-----------|----------|
| chr22 | 33245438  | 33245521  | TIMP3    |
| chr22 | 33253235  | 33253347  | TIMP3    |
| chr22 | 33254003  | 33254125  | TIMP3    |
| chr22 | 33255166  | 33259028  | TIMP3    |
| chr4  | 186990308 | 186990402 | TLR3     |
| chr4  | 186997766 | 186998214 | TLR3     |
| chr4  | 186999993 | 187000185 | TLR3     |
| chr4  | 187003473 | 187005326 | TLR3     |
| chr4  | 187005798 | 187006252 | TLR3     |
| chr9  | 120466459 | 120466843 | TLR4     |
| chr9  | 120474666 | 120479764 | TLR4     |
| chr11 | 85358962  | 85359133  | TMEM126A |
| chr11 | 85361292  | 85361385  | TMEM126A |
| chr11 | 85365106  | 85365300  | TMEM126A |
| chr11 | 85366637  | 85366752  | TMEM126A |
| chr11 | 85367352  | 85367596  | TMEM126A |
| chr9  | 32540542  | 32544324  | TOPORS   |
| chr9  | 32550771  | 32550966  | TOPORS   |
| chr9  | 32552431  | 32552622  | TOPORS   |
| chr3  | 48507228  | 48509044  | TREX1    |
| chr9  | 119449580 | 119449660 | TRIM32   |
| chr9  | 119459940 | 119463579 | TRIM32   |
| chr15 | 31293550  | 31295273  | TRPM1    |
| chr15 | 31318341  | 31318474  | TRPM1    |
| chr15 | 31319117  | 31319320  | TRPM1    |
| chr15 | 31320534  | 31320679  | TRPM1    |
| chr15 | 31321573  | 31321594  | TRPM1    |
| chr15 | 31323185  | 31323360  | TRPM1    |
| chr15 | 31324891  | 31325143  | TRPM1    |
| chr15 | 31327748  | 31327877  | TRPM1    |
| chr15 | 31329913  | 31330045  | TRPM1    |
| chr15 | 31330246  | 31330369  | TRPM1    |
| chr15 | 31332320  | 31332549  | TRPM1    |
| chr15 | 31334153  | 31334446  | TRPM1    |
| chr15 | 31338406  | 31338436  | TRPM1    |
| chr15 | 31339313  | 31339454  | TRPM1    |
| chr15 | 31340091  | 31340142  | TRPM1    |
| chr15 | 31341577  | 31341712  | TRPM1    |
| chr15 | 31342611  | 31342785  | TRPM1    |
| chr15 | 31352746  | 31352847  | TRPM1    |
| chr15 | 31353644  | 31353717  | TRPM1    |
| chr15 | 31354781  | 31354905  | TRPM1    |
| chr15 | 31355320  | 31355495  | TRPM1    |
| chr15 | 31358278  | 31358450  | TRPM1    |
| chr15 | 31359265  | 31359390  | TRPM1    |
| chr15 | 31360081  | 31360295  | TRPM1    |
| chr15 | 31362233  | 31362429  | TRPM1    |

|       |           |           |         |
|-------|-----------|-----------|---------|
| chr15 | 31369107  | 31369187  | TRPM1   |
| chr15 | 31393859  | 31393924  | TRPM1   |
| chr7  | 120427373 | 120428951 | TSPAN12 |
| chr7  | 120446602 | 120446746 | TSPAN12 |
| chr7  | 120450516 | 120450624 | TSPAN12 |
| chr7  | 120455782 | 120455857 | TSPAN12 |
| chr7  | 120478830 | 120478966 | TSPAN12 |
| chr7  | 120480080 | 120480163 | TSPAN12 |
| chr7  | 120496751 | 120496887 | TSPAN12 |
| chr7  | 120497873 | 120498177 | TSPAN12 |
| chr14 | 89290977  | 89291165  | TTC8    |
| chr14 | 89300036  | 89300066  | TTC8    |
| chr14 | 89305795  | 89305916  | TTC8    |
| chr14 | 89307208  | 89307272  | TTC8    |
| chr14 | 89307380  | 89307540  | TTC8    |
| chr14 | 89307768  | 89307858  | TTC8    |
| chr14 | 89310149  | 89310194  | TTC8    |
| chr14 | 89319314  | 89319400  | TTC8    |
| chr14 | 89323533  | 89323621  | TTC8    |
| chr14 | 89327565  | 89327676  | TTC8    |
| chr14 | 89336402  | 89336542  | TTC8    |
| chr14 | 89337892  | 89338067  | TTC8    |
| chr14 | 89338673  | 89338796  | TTC8    |
| chr14 | 89341369  | 89341453  | TTC8    |
| chr14 | 89343637  | 89344335  | TTC8    |
| chr8  | 63972049  | 63973984  | TTPA    |
| chr8  | 63976764  | 63976875  | TTPA    |
| chr8  | 63978462  | 63978656  | TTPA    |
| chr8  | 63985493  | 63985647  | TTPA    |
| chr8  | 63998376  | 63998612  | TTPA    |
| chr6  | 35465650  | 35466237  | TULP1   |
| chr6  | 35467757  | 35467929  | TULP1   |
| chr6  | 35471335  | 35471434  | TULP1   |
| chr6  | 35471513  | 35471625  | TULP1   |
| chr6  | 35473517  | 35473630  | TULP1   |
| chr6  | 35473779  | 35473950  | TULP1   |
| chr6  | 35474050  | 35474056  | TULP1   |
| chr6  | 35476985  | 35477089  | TULP1   |
| chr6  | 35477410  | 35477527  | TULP1   |
| chr6  | 35477603  | 35477705  | TULP1   |
| chr6  | 35478637  | 35478787  | TULP1   |
| chr6  | 35479424  | 35479583  | TULP1   |
| chr6  | 35479956  | 35480047  | TULP1   |
| chr6  | 35480415  | 35480467  | TULP1   |
| chr6  | 35480588  | 35480647  | TULP1   |
| chr17 | 26873724  | 26874427  | UNC119  |
| chr17 | 26874694  | 26874867  | UNC119  |

|       |           |           |        |
|-------|-----------|-----------|--------|
| chr17 | 26875016  | 26875119  | UNC119 |
| chr17 | 26875609  | 26875723  | UNC119 |
| chr17 | 26879355  | 26879646  | UNC119 |
| chr11 | 17515442  | 17515923  | USH1C  |
| chr11 | 17518304  | 17518360  | USH1C  |
| chr11 | 17519708  | 17519818  | USH1C  |
| chr11 | 17522597  | 17522697  | USH1C  |
| chr11 | 17523028  | 17523082  | USH1C  |
| chr11 | 17523485  | 17523527  | USH1C  |
| chr11 | 17538947  | 17539021  | USH1C  |
| chr11 | 17542416  | 17542541  | USH1C  |
| chr11 | 17542892  | 17542958  | USH1C  |
| chr11 | 17544330  | 17544473  | USH1C  |
| chr11 | 17544757  | 17544814  | USH1C  |
| chr11 | 17544965  | 17545025  | USH1C  |
| chr11 | 17545997  | 17546082  | USH1C  |
| chr11 | 17547893  | 17547988  | USH1C  |
| chr11 | 17548299  | 17548357  | USH1C  |
| chr11 | 17548562  | 17548587  | USH1C  |
| chr11 | 17548769  | 17548878  | USH1C  |
| chr11 | 17552700  | 17552839  | USH1C  |
| chr11 | 17552945  | 17553089  | USH1C  |
| chr11 | 17554801  | 17554869  | USH1C  |
| chr11 | 17565818  | 17565963  | USH1C  |
| chr17 | 72912175  | 72914171  | USH1G  |
| chr17 | 72915548  | 72916766  | USH1G  |
| chr17 | 72919004  | 72919351  | USH1G  |
| chr1  | 216347293 | 216348824 | USH2A  |
| chr1  | 216363564 | 216363709 | USH2A  |
| chr1  | 216369894 | 216370064 | USH2A  |
| chr1  | 216371656 | 216371926 | USH2A  |
| chr1  | 216372968 | 216373463 | USH2A  |
| chr1  | 216380614 | 216380773 | USH2A  |
| chr1  | 216390728 | 216390892 | USH2A  |
| chr1  | 216405294 | 216405478 | USH2A  |
| chr1  | 216419926 | 216420568 | USH2A  |
| chr1  | 216424244 | 216424440 | USH2A  |
| chr1  | 216462621 | 216462752 | USH2A  |
| chr1  | 216465516 | 216465712 | USH2A  |
| chr1  | 216495224 | 216495318 | USH2A  |
| chr1  | 216496815 | 216497037 | USH2A  |
| chr1  | 216497509 | 216497694 | USH2A  |
| chr1  | 216498646 | 216498941 | USH2A  |
| chr1  | 216500932 | 216500996 | USH2A  |
| chr1  | 216538294 | 216538427 | USH2A  |
| chr1  | 216591855 | 216592021 | USH2A  |
| chr1  | 216595193 | 216595882 | USH2A  |

|      |           |           |       |
|------|-----------|-----------|-------|
| chr1 | 216596555 | 216596738 | USH2A |
| chr5 | 82767492  | 82767842  | VCAN  |
| chr5 | 82779331  | 82779407  | VCAN  |
| chr5 | 82785916  | 82786291  | VCAN  |
| chr5 | 82789364  | 82789539  | VCAN  |
| chr5 | 82789622  | 82789750  | VCAN  |
| chr5 | 82807921  | 82808215  | VCAN  |
| chr5 | 82815167  | 82818128  | VCAN  |
| chr5 | 82832825  | 82838087  | VCAN  |
| chr5 | 82841355  | 82841469  | VCAN  |
| chr5 | 82843789  | 82843903  | VCAN  |
| chr5 | 82849182  | 82849341  | VCAN  |
| chr5 | 82850774  | 82850857  | VCAN  |
| chr5 | 82868234  | 82868379  | VCAN  |
| chr5 | 82875798  | 82875981  | VCAN  |
| chr5 | 82876125  | 82878122  | VCAN  |
| chr4 | 6271576   | 6271741   | WFS1  |
| chr4 | 6279177   | 6279414   | WFS1  |
| chr4 | 6288819   | 6288902   | WFS1  |
| chr4 | 6290713   | 6290858   | WFS1  |
| chr4 | 6292923   | 6293094   | WFS1  |
| chr4 | 6293643   | 6293724   | WFS1  |
| chr4 | 6296767   | 6296916   | WFS1  |
| chr4 | 6302383   | 6304991   | WFS1  |
