# Supplementary material
Source: PubMed Central journal article supplement (PMC3932025)
Supplement: NIHMS543701-supplement-supplementlist2.pdf [file NIHMS543701-supplement-supplementlist2.pdf]

ABCA4  
ABCC6  
ADAM9  
AHI1  
AIPL1  
ALMS1  
ARL6  
ARMS2  
ATXN7  
BBS1  
BBS10  
BBS12  
BBS2  
BBS4  
BBS5  
BBS7  
BBS9  
BEST1  
C2  
C2ORF71  
C3  
CA4  
CABP4  
CACNA1F  
CACNA2D4  
CC2D2A  
CDH23  
CDH3  
CDHR1  
CEP290  
CERKL  
CFB  
CFH  
CHM  
CLN3  
CLRN1  
CNGA1  
CNGA3  
CNGB1  
CNGB3  
CNNM4  
COL11A1  
COL2A1  
COL9A1  
CRB1  
CRX  
CYP4V2

DFNB31  
DMD  
EFEMP1  
ELOVL4  
ERCC6  
EYS  
FBLN5  
FSCN2  
FZD4  
GNAT1  
GNAT2  
GPR98  
GRK1  
GRM6  
GUCA1A  
GUCA1B  
GUCY2D  
HMCN1  
HTRA1  
IDH3B  
IMPDH1  
INPP5E  
INVS  
IQCB1  
JAG1  
KCNJ13  
KCNV2  
KLHL7  
LCA5  
LRAT  
LRP5  
MERTK  
MFRP:C1QTNF5  
MKKS  
MTTP  
MYO7A  
NDP  
NPHP1  
NPHP3  
NPHP4  
NR2E3  
NRL  
NYX  
OAT  
OFD1  
OPA1  
OPA3

OPN1LW  
OPN1MW  
OPN1SW  
OTX2  
PANK2  
PAX2  
PCDH15  
PDE6A  
PDE6B  
PDE6C  
PDZD7  
PEX1  
PEX2  
PEX7  
PGK1  
PHYH  
PITPNM3  
PRCD  
PROM1  
PRPF3  
PRPF31  
PRPF8  
PRPH2  
RAX2  
RB1  
RBP3  
RBP4  
RD3  
RDH12  
RDH5  
RGR  
RGS9  
RGS9BP  
RHO  
RIMS1  
RLBP1  
ROM1  
RP1  
RP2  
RP9  
RPE65  
RPGR  
RPGRIP1  
RPGRIP1L  
RS1  
SAG  
SEMA4A

SNRNP200  
SPATA7  
TEAD1  
TIMM8A  
TIMP3  
TLR3  
TLR4  
TMEM126A  
TOPORS  
TREX1  
TRIM32  
TRPM1  
TSPAN12  
TTC8  
TTPA  
TULP1  
UNC119  
USH1C  
USH1G  
USH2A  
VCAN  
WFS1
