# Supplementary material
Source: PubMed Central journal article supplement (PMC3932025)
Supplement: NIHMS543701-supplement-supplementtable.pdf [file NIHMS543701-supplement-supplementtable.pdf]

**Table S2. Overview of regions with poor coverage**

|                               | GC%             | Length   | Complexity / length | Tm             | Coverage |
|-------------------------------|-----------------|----------|---------------------|----------------|----------|
| Avg. (low cvg. regions)       | 0.596501        | 248.8409 | 0.466871            | 87.11466       | 0.7      |
| Standard dev. (low)           | 0.130444        | 235.3588 | 0.105623            | 6.578099       | 1.2      |
| Avg. (other regions)          | 0.500257        | 252.8994 | 0.424738            | 82.36241       | 297.3    |
| Standard dev. (others)        | 0.10179         | 548.7422 | 0.107763            | 5.65267        | 132.8    |
| <b>T-test (low vs others)</b> | <b>1.49E-05</b> | 0.913384 | <b>0.011909</b>     | <b>2.1E-05</b> | 0        |

This table displays the GC content, length, complexity/length, and melting temperature of both the low coverage data set, and the set of all other exons, as well as their standard deviations. Complexity was measured as the difference in storage size of a compressed vs uncompressed probe (using the linux algorithm compress), and as such is an inverse measurement of the sequence complexity of the probe. Tm is the melting temperature of the probe. GC% calculates the percentage of base pairs that are either Guanine or Cytosine. A T-test was performed between these two groups, and statistically significant differences were found in the GC content, complexity/ length, and melting temperature of low coverage probes when compared to their normal counterparts.

**Table S3. List of all low coverage capture regions**

| Hg 19 position           | Gene | NM#       | CDS Exon | GC%      | Length | Complexity / length | Tm       | Duplicated regions | Coverage |
|--------------------------|------|-----------|----------|----------|--------|---------------------|----------|--------------------|----------|
| chr1:196658550-196658744 | CFH  | NM_000186 | 8        | 0.410256 | 195    | 0.461538            | 80.54598 | Yes                | 0.0      |
| chr1:196714947-196715129 | CFH  | NM_000186 | 21       | 0.431694 | 183    | 0.464481            | 81.25679 | Yes                | 0.0      |

|                           |         |              |     |          |      |          |          |     |     |
|---------------------------|---------|--------------|-----|----------|------|----------|----------|-----|-----|
| chr1:196716241-196716634  | CFH     | NM_000186    | 22  | 0.337563 | 394  | 0.555838 | 78.86064 | Yes | 0.5 |
| chr2:73826528-73826648    | ALMS1   | NM_015120    | 10  | 0.404959 | 121  | 0.413223 | 78.76065 | Yes | 0.0 |
| chr2:73830368-73830431    | ALMS1   | NM_015120    | 14  | 0.453125 | 64   | 0.328125 | 77.0552  | Yes | 0.0 |
| chr4:47972913-47973117    | CNGA1   | NM_001142564 | 1   | 0.507317 | 205  | 0.482927 | 84.65055 | Yes | 0.0 |
| chr5:178421442-178422124  | GRM6    | NM_000843    | 4   | 0.775988 | 683  | 0.633968 | 97.37303 | No  | 1.3 |
| chr7:33140143-33140173    | RP9     | NM_203288    | 2   | 0.451613 | 31   | 0.129032 | 68.67667 | Yes | 0.0 |
| chr7:33148833-33149002    | RP9     | NM_203288    | 1   | 0.752941 | 170  | 0.5      | 94.21899 | No  | 0.8 |
| chr8:63998377-63998612    | TTPA    | NM_000370    | 1   | 0.762712 | 236  | 0.533898 | 95.44212 | No  | 3.3 |
| chrX:77359666-77359902    | PGK1    | NM_000291    | 1   | 0.632911 | 237  | 0.50211  | 90.12924 | No  | 0.0 |
| chrX:77365364-77365414    | PGK1    | NM_000291    | 2   | 0.392157 | 51   | 0.27451  | 72.56408 | Yes | 0.0 |
| chrX:77369513-77369657    | PGK1    | NM_000291    | 4   | 0.531034 | 145  | 0.455172 | 84.61371 | Yes | 1.2 |
| chrX:77373548-77373667    | PGK1    | NM_000291    | 6   | 0.558333 | 120  | 0.391667 | 85.01457 | Yes | 0.5 |
| chrX:77380371-77380548    | PGK1    | NM_000291    | 9   | 0.52809  | 178  | 0.466292 | 85.13227 | Yes | 1.1 |
| chrX:77380824-77380922    | PGK1    | NM_000291    | 10  | 0.565657 | 99   | 0.383838 | 84.43099 | Yes | 0.7 |
| chrX:77381287-77382324    | PGK1    | NM_000291    | 11  | 0.365125 | 1038 | 0.630058 | 80.77801 | Yes | 0.0 |
| chrX:153409725-153409869  | OPN1LW  | NM_020061    | 1   | 0.627586 | 145  | 0.448276 | 88.57233 | Yes | 0.7 |
| chrX:153416128-153416424  | OPN1LW  | NM_020061    | 2   | 0.579125 | 297  | 0.525253 | 88.35018 | Yes | 0.0 |
| chrX:153421769-153422008  | OPN1LW  | NM_020061    | 5   | 0.541667 | 240  | 0.5125   | 86.41457 | Yes | 4.9 |
| chrX:153424291-153424507  | OPN1LW  | NM_020061    | 6   | 0.520737 | 217  | 0.483871 | 85.33566 | Yes | 0.0 |
| chrX:153448085-153448278* | OPN1MW  | NM_000513    | 1   | 0.634021 | 194  | 0.494845 | 89.7071  | Yes | 0.5 |
| chrX:153453259-153453555  | OPN1MW  | NM_000513    | 2   | 0.579125 | 297  | 0.525253 | 88.35018 | Yes | 0.2 |
| chrX:153461421-153462351  | OPN1MW  | NM_000513    | 6   | 0.568206 | 931  | 0.61869  | 89.04897 | Yes | 0.2 |
| chrX:153485203-153485396* | OPN1MW2 | NM_001048181 | 1   | 0.634021 | 194  | 0.494845 | 89.7071  | Yes | 0.7 |
| chrX:153490377-153490673  | OPN1MW2 | NM_001048181 | 2   | 0.579125 | 297  | 0.525253 | 88.35018 | Yes | 0.4 |
| chrX:153498539-153499469  | OPN1MW2 | NM_001048181 | 6   | 0.568206 | 931  | 0.621912 | 89.04897 | Yes | 0.0 |
| chr10:85954412-85954571   | CDHR1   | NM_001171971 | 1   | 0.76875  | 160  | 0.5      | 94.68332 | No  | 1.3 |
| chr10:95360928-95360993   | RBP4    | NM_006744    | UTR | 0.80303  | 66   | 0.363636 | 91.63806 | No  | 0.0 |
| chr10:124221041-124221640 | HTRA1   | NM_002775    | 1   | 0.795    | 600  | 0.64     | 98.05124 | No  | 0.7 |
| chr11:12695969-12696381   | TEAD1   | NM_021961    | UTR | 0.784504 | 413  | 0.588378 | 97.24357 | No  | 1.0 |
| chr11:68080108-68080273   | LRP5    | NM_002335    | 1   | 0.825301 | 166  | 0.53012  | 97.11488 | No  | 0.0 |

|                         |          |              |     |          |     |          |          |     |     |
|-------------------------|----------|--------------|-----|----------|-----|----------|----------|-----|-----|
| chr14:68168603-68168652 | RDH12    | NM_152443    | UTR | 0.58     | 50  | 0.26     | 80.06957 | Yes | 0.0 |
| chr16:16297267-16297470 | ABCC6    | NM_001171    | 7   | 0.563725 | 204 | 0.485294 | 86.95134 | Yes | 3.1 |
| chr16:16302585-16302716 | ABCC6    | NM_001171    | 6   | 0.560606 | 132 | 0.439394 | 85.48654 | Yes | 0.0 |
| chr16:16306042-16306103 | ABCC6    | NM_001171    | 5   | 0.612903 | 62  | 0.306452 | 83.35409 | Yes | 0.1 |
| chr16:16308181-16308306 | ABCC6    | NM_001171    | 4   | 0.619048 | 126 | 0.452381 | 87.70227 | Yes | 1.3 |
| chr16:16313411-16313539 | ABCC6    | NM_001171    | 3   | 0.55814  | 129 | 0.395349 | 85.29733 | Yes | 0.0 |
| chr16:16313679-16313804 | ABCC6    | NM_001171    | 2   | 0.547619 | 126 | 0.396825 | 84.7737  | Yes | 0.0 |
| chr16:16315506-16315688 | ABCC6    | NM_001171    | 1   | 0.606557 | 183 | 0.486339 | 88.42619 | Yes | 0.3 |
| chr16:16317256-16317328 | ABCC6    | NM_001171    | UTR | 0.739726 | 73  | 0.356164 | 89.76903 | Yes | 0.0 |
| chr16:53656131-53656268 | RPGRIP1L | NM_015272.2  | 23  | 0.608696 | 138 | 0.427536 | 87.62291 | Yes | 0.5 |
| chr17:6459705-6459877   | PITPNM3  | NM_001165966 | 1   | 0.849711 | 173 | 0.543353 | 98.23755 | No  | 0.0 |
| chr17:79503901-79504155 | FSCN2    | NM_012418    | 5   | 0.729412 | 255 | 0.513725 | 94.23467 | No  | 4.5 |

Table S3 lists all regions of poor coverage, along with their GC content, length, complexity per unit length, predicted melting temperature and coverage. Duplicated regions are defined as having one or more similar genomic loci that have more than 90% identity in sequence and in homologous length, supported by UCSC genome browser BLAT results (<http://genome.ucsc.edu/cgi-bin/hgBlat?command=start>). \*: The two regions have the same sequence.

**Table S4. *In silico* prediction of novel missense mutations**

| Gene          | Patient ID | Mutations           | PhyloP |        | SIFT  |      | Polyphen2 |           | LRT | MutationTaster |
|---------------|------------|---------------------|--------|--------|-------|------|-----------|-----------|-----|----------------|
|               |            |                     | Score  | PhyloP | Score | SIFT | Score     | Polyphen2 |     |                |
| <i>ALMS1</i>  | 3779       | c.9764C>G, p.S3255C | 0.98   | C      | 1.00  | D    | 0.48      | P         | N   | N              |
| <i>BBS7</i>   | 1327       | c.728G>A, p.C243Y   | 1.00   | C      | 1.00  | D    | 1.00      | D         | D   | D              |
| <i>CRB1</i>   | 3319       | c.1439G>C, p.C480S  | 1.00   | C      | 1.00  | D    | 1.00      | D         | na  | D              |
| <i>GUCY2D</i> | 1272       | c.1933T>C, p.S645P  | 1.00   | C      | 1.00  | D    | 1.00      | D         | D   | D              |
| <i>GUCY2D</i> | 1272       | c.2207T>G, p.M736R  | 1.00   | C      | 0.99  | D    | 1.00      | D         | N   | D              |
| <i>GUCY2D</i> | 3611       | c.2132C>T, p.P711L  | 1.00   | C      | 1.00  | D    | 1.00      | D         | D   | D              |
| <i>GUCY2D</i> | 3725       | c.2678C>T, p.S893F  | 1.00   | C      | 1.00  | D    | 1.00      | D         | D   | D              |
| <i>GUCY2D</i> | 3799       | c.743C>G, p.S248W   | 1.00   | C      | 1.00  | D    | 1.00      | D         | D   | D              |
| <i>INPP5E</i> | 3773       | c.1861C>T, p.R621W  | 1.00   | C      | 1.00  | D    | 1.00      | D         | D   | D              |

|                 |      |                     |      |   |      |   |      |   |   |   |
|-----------------|------|---------------------|------|---|------|---|------|---|---|---|
| <i>PDE6A</i>    | 1313 | c.2333A>T, p.D778V  | 1.00 | C | 1.00 | D | 1.00 | D | D | D |
| <i>RDH12</i>    | 3740 | c.692G>A, p.G231D   | 0.99 | C | 1.00 | D | 1.00 | D | D | D |
| <i>SNRNP200</i> | 3795 | c.3133C>A, p.P1045T | 1.00 | C | 1.00 | D | 1.00 | D | D | D |
| <i>TULP1</i>    | 1268 | c.1277C>T, p.P426L  | 1.00 | C | 1.00 | D | 1.00 | D | D | D |
| <i>TULP1</i>    | 1268 | c.1518C>A, p.F506L  | 0.75 | N | 1.00 | D | 1.00 | D | D | D |
| <i>TULP1</i>    | 3681 | c.1064A>T, p.D355V  | 1.00 | C | 0.99 | D | 0.99 | D | D | D |
| <i>TULP1</i>    | 3771 | c.961T>G, p.Y321D   | 1.00 | C | 1.00 | D | 1.00 | D | D | D |

#The prediction score and results are generated from PhyloP, SIFT, Polyphen2, LRT, and MutationTaster, and compiled by dbNSFP.

C: conserved; D: damaging; N: neutral; P, possibly damaging; na: not available. When dbNSFP don't have pre-computed scores for specific mutation, we searched the online server provided by each program to get the original prediction score, then convert the score to dbNSFP score according to dbNSFP standard.

**Table S5. Prescreening information for subset of our patient cohort**

| Patient ID | LCA        |        | arRP       |      | RPGRIP1 | AIPL1 | RPE65 | CRX | CRB1 | GUCY2D | Solved by NGS: known LCA gene | Why prescreening failed |
|------------|------------|--------|------------|------|---------|-------|-------|-----|------|--------|-------------------------------|-------------------------|
|            | APEX array | DATE   | APEX array | DATE |         |       |       |     |      |        |                               |                         |
| 54         | yes        | Oct-03 |            |      | yes     | yes   | yes   | yes | yes  | yes    | yes                           | A                       |
| 208        | yes        | Oct-03 |            |      | yes     | yes   | yes   | yes | yes  | yes    |                               |                         |
| 251        |            |        |            |      | yes     |       |       |     | yes  | yes    |                               |                         |
| 285        | yes        | Oct-03 |            |      | yes     | yes   | yes   | yes | yes  |        |                               |                         |
| 291        | yes        | Oct-03 |            |      | yes     | yes   | yes   | yes | yes  |        |                               |                         |
| 361        |            |        |            |      |         | yes   | yes   | yes | yes  |        |                               |                         |
| 393        |            |        |            |      |         | yes   | yes   | yes | yes  | yes    | yes                           | B                       |
| 398        |            |        |            |      | yes     | yes   | yes   | yes | yes  | yes    | yes                           | B                       |
| 408        | yes        | Oct-03 | Apr-08     |      | yes     | yes   |       | yes | yes  | yes    |                               |                         |
| 418        | yes        | Oct-03 |            |      | yes     | yes   |       | yes | yes  | yes    | yes                           | A, B                    |
| 432        | yes        | Oct-03 |            |      | yes     | yes   | yes   | yes | yes  |        |                               |                         |
| 486        | yes        | Oct-03 |            |      | yes     | yes   | yes   | yes | yes  |        |                               |                         |
| 489        |            |        |            |      |         |       |       |     |      |        |                               |                         |
| 512        | yes        | Oct-03 | Aug-07     |      | yes     | yes   | yes   | yes | yes  |        |                               |                         |

|      |     |        |     |        |     |     |     |     |     |     |
|------|-----|--------|-----|--------|-----|-----|-----|-----|-----|-----|
| 518  | yes | Oct-03 |     |        |     |     |     |     |     |     |
| 617  | yes | Oct-03 |     |        | yes | yes | yes | yes | yes |     |
| 622  | yes | Oct-03 |     |        | yes | yes | yes | yes | yes | yes |
| 635  |     |        |     |        | yes | yes | yes | yes | yes |     |
| 647  |     |        |     |        |     | yes | yes | yes | yes |     |
| 690  | yes | Oct-03 | yes | Jun-05 | yes | yes | yes | yes | yes |     |
| 704  | yes | Oct-03 |     |        |     | yes | yes | yes | yes |     |
| 787  |     |        |     |        | yes | yes | yes | yes | yes |     |
| 789  |     |        |     |        |     | yes | yes | yes | yes |     |
| 1171 |     |        |     |        |     | yes | yes | yes | yes |     |
| 1174 |     |        |     |        | yes | yes | yes | yes | yes |     |
| 1248 |     |        | yes | Apr-05 | yes | yes | yes | yes | yes |     |
| 1250 |     |        |     |        | yes | yes | yes | yes | yes |     |
| 1251 |     |        |     |        | yes | yes | yes | yes | yes | yes |
| 1253 |     |        |     |        | yes | yes | yes | yes | yes |     |
| 1255 |     |        |     |        | yes | yes | yes | yes | yes |     |
| 1257 |     |        |     |        | yes | yes | yes | yes | yes |     |
| 1259 |     |        |     |        | yes | yes | yes | yes | yes | yes |
| 1262 |     |        |     |        | yes | yes | yes | yes | yes |     |
| 1268 |     |        |     |        | yes | yes | yes | yes | yes | yes |
| 1269 |     |        |     |        | yes | yes | yes | yes | yes |     |
| 1271 |     |        |     |        | yes | yes | yes | yes | yes | yes |
| 1272 |     |        |     |        | yes | yes | yes | yes | yes | yes |
| 1273 |     |        |     |        | yes | yes | yes | yes | yes |     |
| 1275 |     |        |     |        | yes | yes | yes | yes | yes |     |
| 1278 |     |        |     |        | yes | yes | yes | yes | yes | yes |
| 1290 |     |        |     |        |     | yes | yes | yes | yes |     |
| 1303 |     |        |     |        |     | yes | yes | yes | yes | yes |
| 1311 |     |        |     |        | yes | yes | yes | yes | yes |     |
| 1312 |     |        |     |        | yes | yes | yes | yes | yes |     |
| 1313 |     |        |     |        | yes | yes | yes | yes | yes |     |

|      |     |        |     |     |     |     |     |     |   |
|------|-----|--------|-----|-----|-----|-----|-----|-----|---|
| 1314 |     |        | yes | yes | yes | yes | yes |     |   |
| 1315 |     |        | yes | yes | yes | yes | yes | yes | C |
| 1318 |     |        | yes | yes | yes | yes | yes |     |   |
| 1327 |     |        | yes | yes | yes | yes | yes |     |   |
| 1331 |     |        | yes | yes | yes | yes | yes |     |   |
| 1332 |     |        | yes | yes | yes | yes | yes |     |   |
| 1379 |     |        |     | yes | yes | yes | yes |     |   |
| 1380 |     |        |     | yes | yes | yes | yes |     |   |
| 1381 |     |        |     | yes | yes | yes | yes |     |   |
| 1413 |     |        |     |     | yes | yes | yes | yes | C |
| 1472 |     |        |     |     | yes | yes | yes |     |   |
| 1473 |     |        |     |     | yes | yes | yes | yes | C |
| 1842 |     |        |     |     |     |     |     |     |   |
| 1896 |     |        |     |     |     |     |     |     |   |
| 3062 |     |        |     |     |     |     |     |     |   |
| 3075 |     |        |     |     |     |     |     |     |   |
| 3256 |     |        |     |     |     |     |     |     |   |
| 3294 | yes | Apr-08 |     |     |     |     |     |     |   |
| 3311 | yes | Apr-08 |     |     |     |     |     |     |   |
| 3319 | yes | Apr-08 |     |     |     |     |     | yes | A |
| 3425 |     |        |     |     |     |     |     |     |   |
| 3443 | yes | Apr-09 |     |     |     |     |     |     |   |
| 3494 |     |        |     |     |     |     |     |     |   |
| 3550 | yes | Jun-10 |     |     |     |     |     |     |   |
| 3551 |     |        |     |     |     |     |     |     |   |
| 3557 |     |        |     |     |     |     |     | yes | C |
| 3561 | yes | Apr-09 |     |     |     |     |     | yes | A |
| 3577 |     |        |     |     |     |     |     | yes | C |
| 3582 |     |        |     |     |     |     |     |     |   |
| 3596 | yes | Apr-09 |     |     |     |     |     |     |   |
| 3611 |     |        |     |     |     |     |     | yes | C |

|      |     |        |  |  |     |  |   |
|------|-----|--------|--|--|-----|--|---|
| 3628 |     |        |  |  |     |  |   |
| 3698 | yes | Jun-10 |  |  |     |  |   |
| 3719 |     |        |  |  |     |  |   |
| 3722 |     |        |  |  | yes |  | C |
| 3725 |     |        |  |  | yes |  | C |
| 3916 |     |        |  |  | yes |  | C |
| 3973 |     |        |  |  |     |  |   |
| 3985 | yes | Jun-10 |  |  |     |  |   |
| 4012 |     |        |  |  |     |  |   |
| 4013 |     |        |  |  |     |  |   |
| 4016 |     |        |  |  |     |  |   |
| 4019 |     |        |  |  | yes |  | C |

Columns in table S5: LCA APEX array: this indicates whether or not the sample had been screened by LCA APEX array; arRP APEX array: this indicates whether or not the sample had been screened by autosomal recessive RP APEX array; Date: the date when the sample was screened by the array; Six columns with gene names: this indicates whether or not the sample had been Sanger sequenced for the frequently mutated exons in the corresponding gene; Solved by NGS: known LCA gene: this indicates whether or not mutations in known LCA genes were identified by our targeted NGS method in the sample; Why prescreening failed: this is to explain why the mutations in known LCA genes had not been captured by the prescreening (A: the mutations had not been covered by the array; B: the mutant exon had not been covered by Sanger sequencing, only the frequently mutated exons in the corresponding gene were Sanger sequenced; C: the sample had neither been screened by LCA APEX array nor been Sanger sequenced for the corresponding genes identified in the sample).
