# Supplementary material
Source: PubMed Central journal article supplement (PMC3932025)

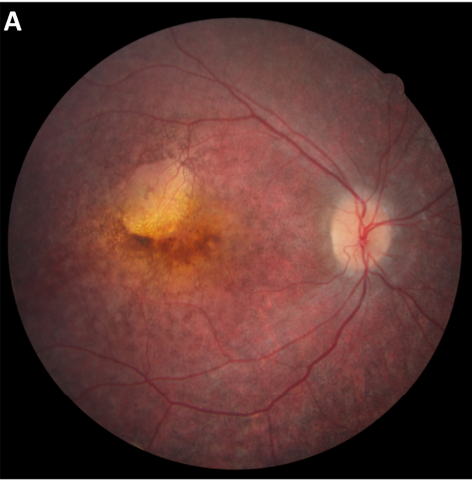

Figure S1

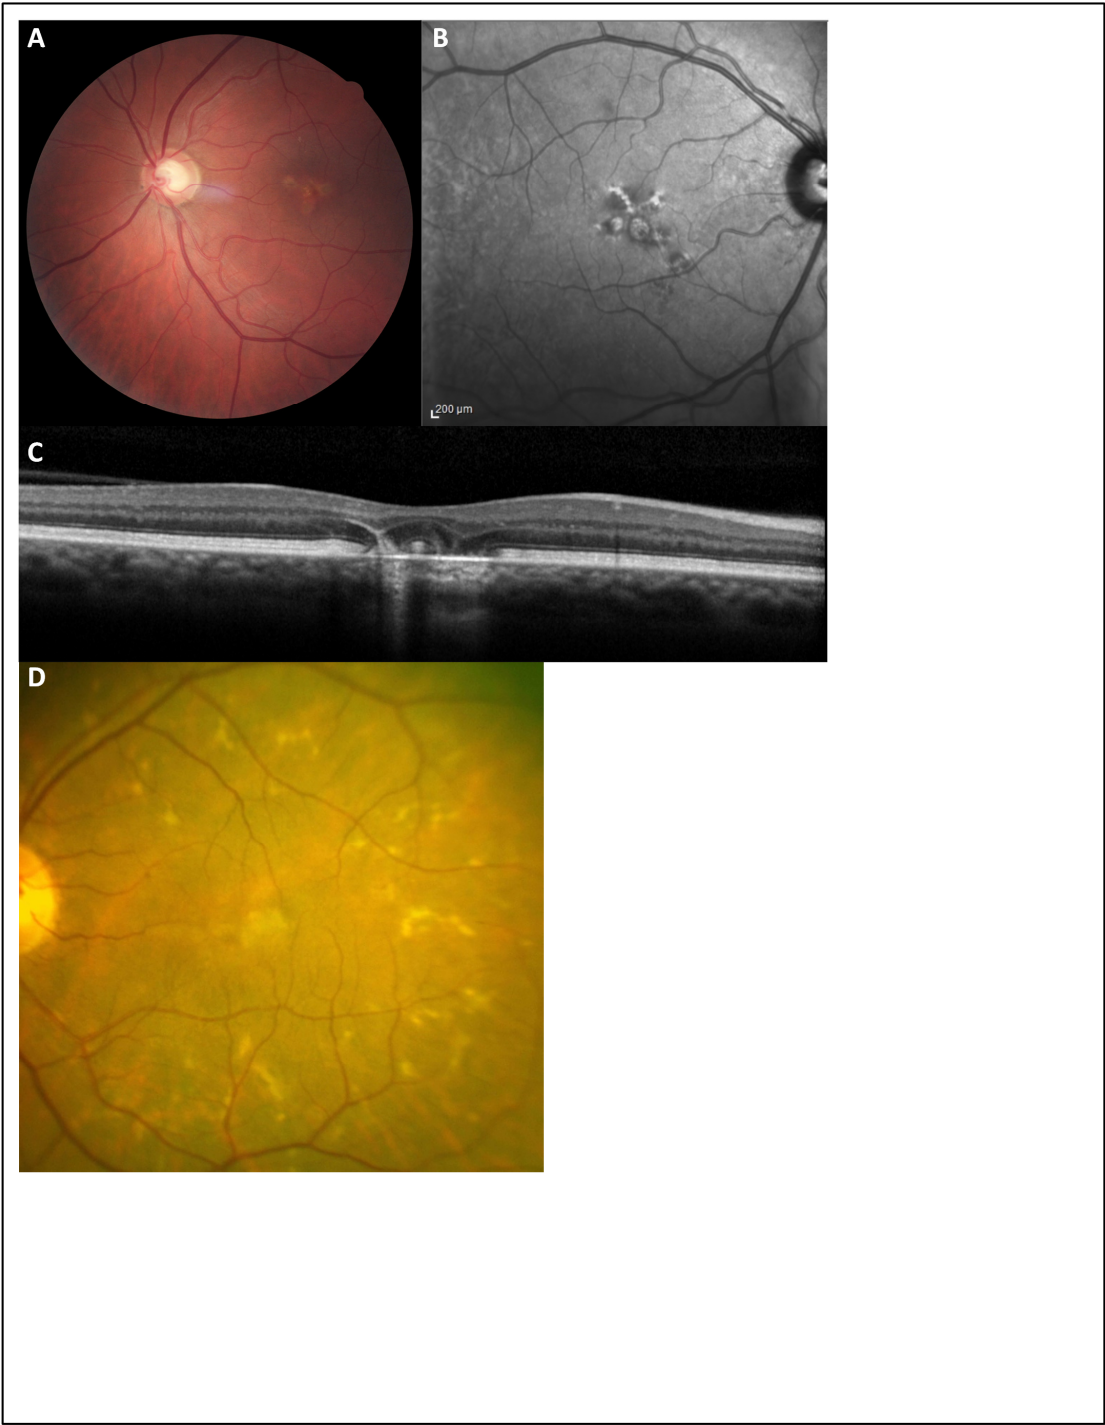

Figure S2

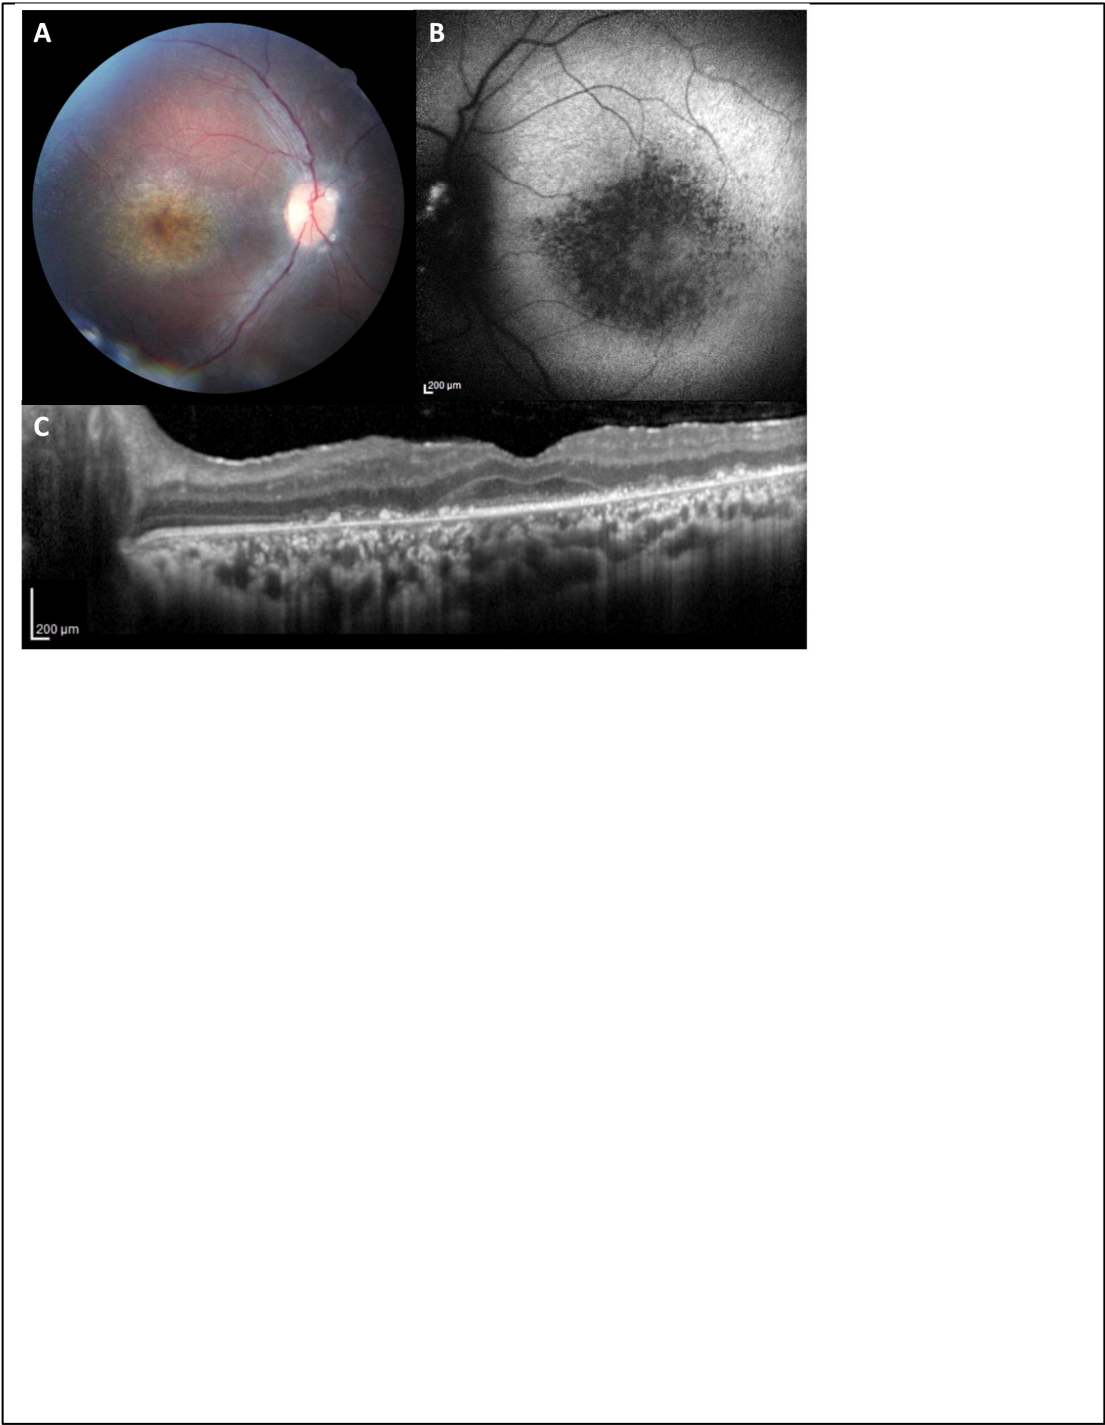

Figure S3

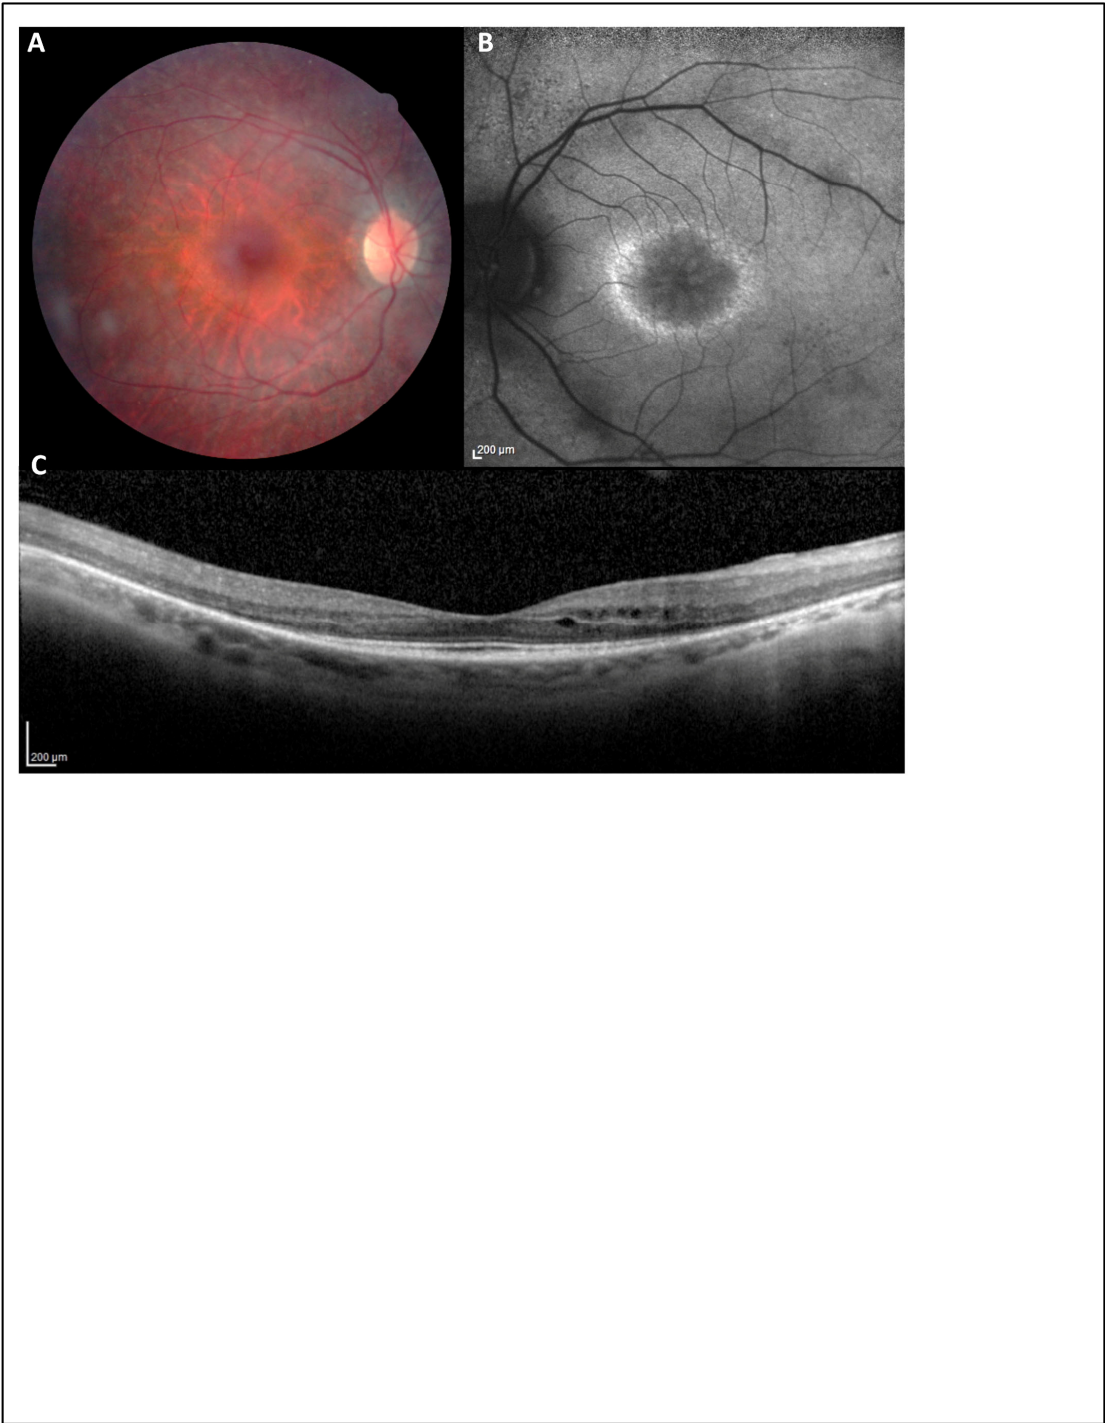

Figure S4

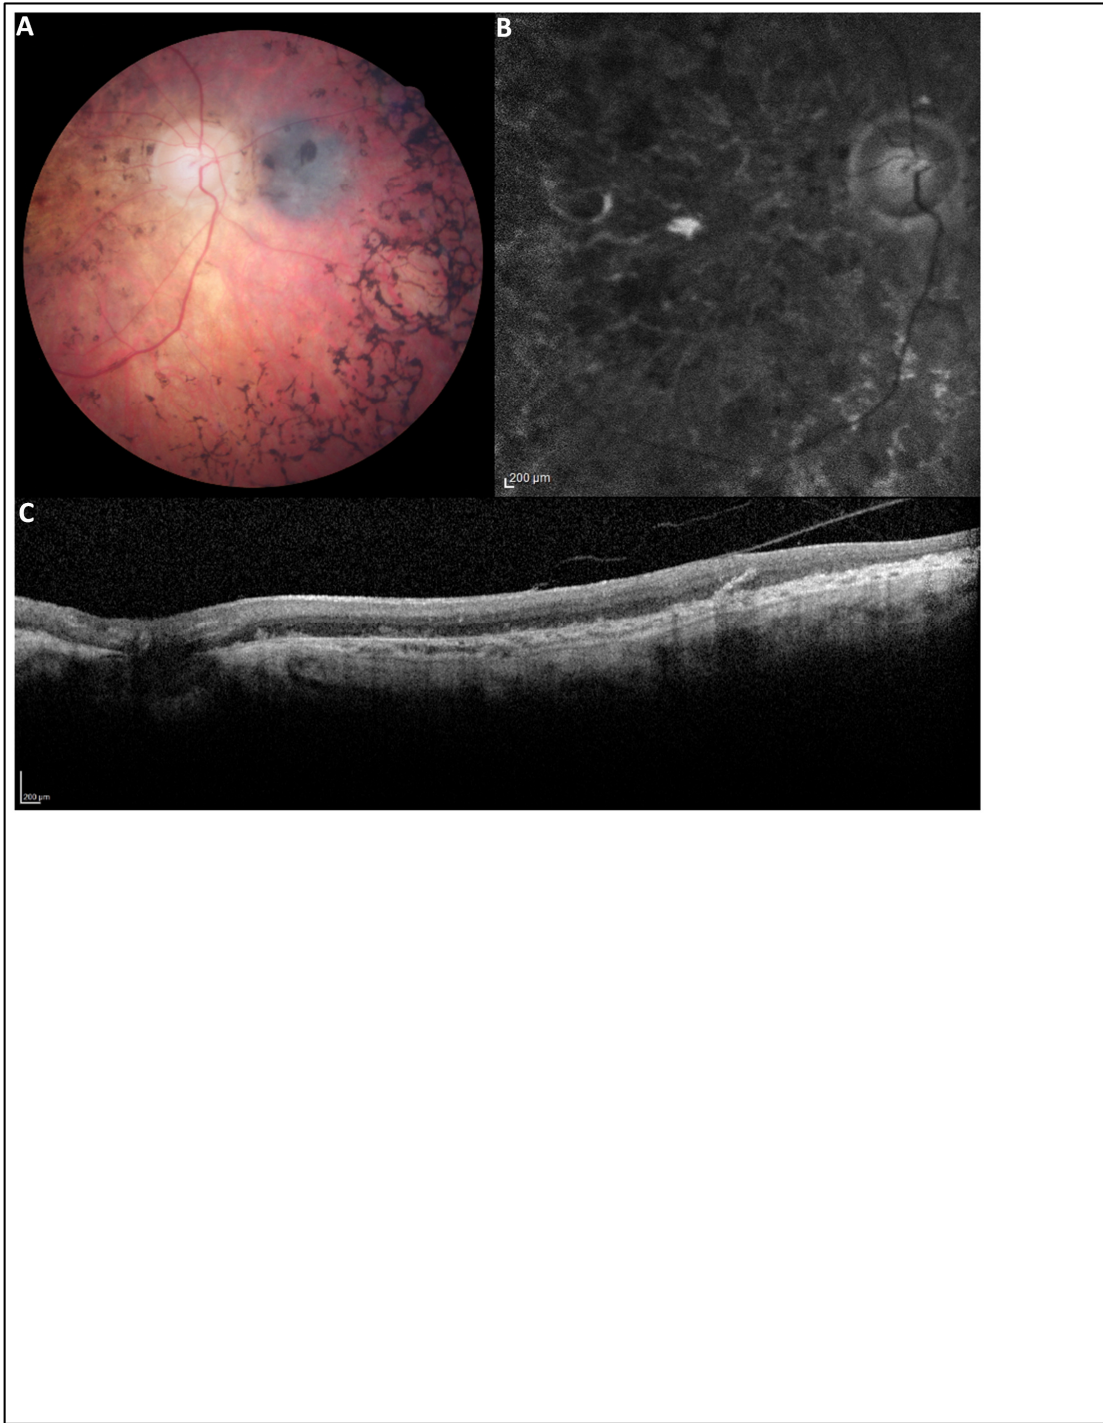

Figure S5

Supplement: NIHMS543701-supplement-supplementFigure.pdf [file NIHMS543701-supplement-supplementFigure.pdf]
